# Supplementary material for: Cohort profile: the National Congenital Anomaly Registration Dataset in England
Source: PubMed Central journal article supplement — BMJ Open. 2024 Jan 12;14(1):e077743. doi: 10.1136/bmjopen-2023-077743 (PMC10806630; doi:10.1136/bmjopen-2023-077743), 2024-01-12
Supplement: bmjopen-2023-077743.draft_revisions.pdf [file bmjopen-2023-077743.draft_revisions.pdf]

# BMJ Open

BMJ Open is committed to open peer review. As part of this commitment we make the peer review history of every article we publish publicly available.

When an article is published we post the peer reviewers' comments and the authors' responses online. We also post the versions of the paper that were used during peer review. These are the versions that the peer review comments apply to.

The versions of the paper that follow are the versions that were submitted during the peer review process. They are not the versions of record or the final published versions. They should not be cited or distributed as the published version of this manuscript.

BMJ Open is an open access journal and the full, final, typeset and author-corrected version of record of the manuscript is available on our site with no access controls, subscription charges or pay-per-view fees (<http://bmjopen.bmj.com>).

If you have any questions on BMJ Open's open peer review process please email [info.bmjopen@bmj.com](mailto:info.bmjopen@bmj.com)

# BMJ Open

## COHORT PROFILE : THE NATIONAL CONGENITAL ANOMALY REGISTRATION DATASET IN ENGLAND

|                               |                                                                                                                                                                                                                                                                                                                                                                                                                                                                                                                                                                                                                                                                                                                                                                                                               |
|-------------------------------|---------------------------------------------------------------------------------------------------------------------------------------------------------------------------------------------------------------------------------------------------------------------------------------------------------------------------------------------------------------------------------------------------------------------------------------------------------------------------------------------------------------------------------------------------------------------------------------------------------------------------------------------------------------------------------------------------------------------------------------------------------------------------------------------------------------|
| Journal:                      | <i>BMJ Open</i>                                                                                                                                                                                                                                                                                                                                                                                                                                                                                                                                                                                                                                                                                                                                                                                               |
| Manuscript ID                 | bmjopen-2023-077743                                                                                                                                                                                                                                                                                                                                                                                                                                                                                                                                                                                                                                                                                                                                                                                           |
| Article Type:                 | Cohort profile                                                                                                                                                                                                                                                                                                                                                                                                                                                                                                                                                                                                                                                                                                                                                                                                |
| Date Submitted by the Author: | 13-Jul-2023                                                                                                                                                                                                                                                                                                                                                                                                                                                                                                                                                                                                                                                                                                                                                                                                   |
| Complete List of Authors:     | Broughan, Jennifer; NHS England, Data and Analytics Directorate<br>Wreyford, Ben; NHS England, Data and Analytics Directorate<br>Martin, Danielle; NHS England, Data and Analytics Directorate<br>Melis, Gabriella; NHS England, Data and Analytics Directorate<br>Randall, Kay; NHS England, Data and Analytics Directorate<br>Obaro, Ewoma; NHS England, Data and Analytics Directorate<br>Broggio, John; NHS Digital, National Disease Registration Service<br>Aldridge, Nicholas; NHS England, Data and Analytics Directorate<br>Stoianova, Sylvia; NHS England<br>Johnson, Chloe; NHS England, Data and Analytics Directorate<br>Gibbard, Donna; NHS England, Data and Analytics Directorate<br>Stevens, Sarah; NHS England<br>Fleming, Kate M; NHS England, Data & Analytics Transformation Directorate |
| Keywords:                     | EPIDEMIOLOGY, PUBLIC HEALTH, REGISTRIES, NEONATOLOGY, PAEDIATRICS                                                                                                                                                                                                                                                                                                                                                                                                                                                                                                                                                                                                                                                                                                                                             |
|                               |                                                                                                                                                                                                                                                                                                                                                                                                                                                                                                                                                                                                                                                                                                                                                                                                               |

SCHOLARONE™  
Manuscripts

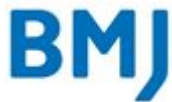

I, the Submitting Author has the right to grant and does grant on behalf of all authors of the Work (as defined in the below author licence), an exclusive licence and/or a non-exclusive licence for contributions from authors who are: i) UK Crown employees; ii) where BMJ has agreed a CC-BY licence shall apply, and/or iii) in accordance with the terms applicable for US Federal Government officers or employees acting as part of their official duties; on a worldwide, perpetual, irrevocable, royalty-free basis to BMJ Publishing Group Ltd ("BMJ") its licensees and where the relevant Journal is co-owned by BMJ to the co-owners of the Journal, to publish the Work in this journal and any other BMJ products and to exploit all rights, as set out in our [licence](#).

The Submitting Author accepts and understands that any supply made under these terms is made by BMJ to the Submitting Author unless you are acting as an employee on behalf of your employer or a postgraduate student of an affiliated institution which is paying any applicable article publishing charge ("APC") for Open Access articles. Where the Submitting Author wishes to make the Work available on an Open Access basis (and intends to pay the relevant APC), the terms of reuse of such Open Access shall be governed by a Creative Commons licence – details of these licences and which [Creative Commons](#) licence will apply to this Work are set out in our licence referred to above.

Other than as permitted in any relevant BMJ Author's Self Archiving Policies, I confirm this Work has not been accepted for publication elsewhere, is not being considered for publication elsewhere and does not duplicate material already published. I confirm all authors consent to publication of this Work and authorise the granting of this licence.

1  
2  
3  
4  
5  
6 COHORT PROFILE : THE NATIONAL CONGENITAL ANOMALY REGISTRATION DATASET IN ENGLAND  
7  
8

9 Jennifer M Broughan, Ben Wreyford, Danielle Martin, Gabriella Melis, Kay Randall, Ewoma Obaro,  
10  
11 John Broggio, Nicholas Aldridge , Sylvia Stoianova, Chloe Johnson, Donna Gibbard, Sarah Stevens &  
12  
13 Kate Fleming  
14

15  
16 National Congenital Anomaly and Rare Disease Registration Service, National Disease Registration  
17  
18 Service, Data and Analytics Directorate, NHS England, 7 Wellington Pl, Whitehall Rd, Leeds LS1 4EG,  
19  
20  
21 UK.  
22

23  
24 Word count (not including references or abstract): 3264  
25

26  
27 Jennifer M Broughan,

28 Ben Wreyford, [ben.wreyford@nhs.net](mailto:ben.wreyford@nhs.net)

29  
30 Danielle Martin, [Danielle.Martin17@nhs.net](mailto:Danielle.Martin17@nhs.net)

31  
32 Gabriella Melis, [Gabriella.Melis1@nhs.net](mailto:Gabriella.Melis1@nhs.net)

33  
34 Kay Randall, [kay.randall@nhs.net](mailto:kay.randall@nhs.net)

35  
36 Ewoma Obaro, [ewoma.obaro@nhs.net](mailto:ewoma.obaro@nhs.net)

37  
38 John Broggio, [john.broggio@nhs.net](mailto:john.broggio@nhs.net)

39  
40 Nicholas Aldridge, [nicholas.aldridge@nhs.net](mailto:nicholas.aldridge@nhs.net)

41  
42 Sylvia Stoianova, [Sylvia.Stoianova@bristol.ac.uk](mailto:Sylvia.Stoianova@bristol.ac.uk)

43  
44 Chloe Johnson, [Chloe.Johnson6@dhsc.gov.uk](mailto:Chloe.Johnson6@dhsc.gov.uk)

45  
46 Donna Gibbard, [donna.gibbard@nhs.net](mailto:donna.gibbard@nhs.net)

47  
48 Sarah Stevens, [sarah.stevens1@nhs.net](mailto:sarah.stevens1@nhs.net)

49  
50 Kate M Fleming, [kate.fleming5@nhs.net](mailto:kate.fleming5@nhs.net)

51  
52 Correspondence to:

53  
54 Jennifer Broughan, PhD

55  
56 National Disease Registration Service

57  
58 NHS England

59  
60 7 and 8 Wellington Pl,

1  
2  
3  
4  
5  
6  
7  
8  
9  
10  
11  
12  
13  
14  
15  
16  
17  
18  
19  
20  
21  
22  
23  
24  
25  
26  
27  
28  
29  
30  
31  
32  
33  
34  
35  
36  
37  
38  
39  
40  
41  
42  
43  
44  
45  
46  
47  
48  
49  
50  
51  
52  
53  
54  
55  
56  
57  
58  
59  
60

Whitehall Rd,  
Leeds  
LS1 4EG,  
UK.  
[Jennifer.Broughan@nhs.net](mailto:Jennifer.Broughan@nhs.net)  
Tel +44 7769282928  
ORCID 0000-0002-4450-2147

For peer review only

## ABSTRACT

### **Purpose**

The National Congenital Anomaly and Rare Disease Registration Service (NCARDRS), part of National Disease Registration Service (NDRS) in NHS England, collects, quality assures, curates and analyses individual data on the pregnancies, fetuses, babies, children and adults with congenital anomalies and rare diseases across England. The congenital anomaly (CA) register provides a resource for patients and their families, clinicians, researchers, and public health professionals in furthering the understanding of CAs.

### **Participants**

NCARDRS registers CAs that occur in babies born alive and stillborn, fetal losses and terminations in England. NCARDRS collects data from secondary and tertiary health care providers with maternal or paediatric departments, private providers and laboratories covering fetal medicine, maternity or paediatric services. Data describe the pregnancy, mother, baby, and anomaly. Established in 2015, NCARDRS expanded CA registration coverage from 22% of total births in England in 2015 until national coverage was achieved in 2018. Prior to 2015, data collection was performed independently by regional registers in England and this data is also held by NCARDRS.

### **Findings to date:**

With a coverage of approximately 600,000 total births per year, the NCARDRS CA register is the largest globally. Data on prevalence, risk factors and survival for children with CAs are available. Data has been used in several peer reviewed publications. Birth prevalence statistics, including public health indicators such as the association with maternal age, infant and perinatal mortality, are published annually. NCARDRS supports clinical audit for screening programmes and service evaluation.

### **Future plans:**

1  
2  
3 NCARDS provides a valuable resource for the understanding of the epidemiology,  
4 surveillance, prevention and treatment of CAs. Currently, approximately 21,000 new  
5 registrations of babies or fetuses with suspected or confirmed CAs are added each year.  
6 Identifiers are collected, enabling linkage to routinely collected healthcare and population  
7 statistics, further enhancing the value of the data.  
8  
9  
10  
11  
12  
13

### 14 Key words

15  
16  
17  
18 Epidemiology, Public Health, Registries, neonatology, paediatrics  
19  
20  
21

22 **Details of contributions:** JMB led the drafting of the manuscript with additional sections  
23 drafted by BW, DG, CJ, SS, NA. Data analysis was performed by JMB, DM, GM and EO. All  
24 authors reviewed and commented on the manuscript.  
25  
26  
27  
28  
29  
30  
31  
32

### 33 Conflicts of interests statement

34  
35  
36  
37 No conflicts of interest have been declared.  
38  
39  
40

### 41 Data availability statement

42  
43  
44  
45 Permission to access congenital anomaly registration data can be granted to individuals who  
46 demonstrate that either there is a justified purpose for the data release, that there is an  
47 appropriate legal basis with safeguards in place to protect the data, or the data release is  
48 deemed to be anonymous (e.g. aggregate data). The access process for NDRS data is  
49 managed by [Data Access Request Service](#) (DARS) in NHS England. Full details, including  
50 data dictionaries, are available. Further details on the process of data access and associated  
51 costs are available on the DARS website [[https://digital.nhs.uk/services/data-access-request-](https://digital.nhs.uk/services/data-access-request-service-dars)  
52 [service-dars](https://digital.nhs.uk/services/data-access-request-service-dars)](1).  
53  
54  
55  
56  
57  
58  
59  
60

## Collaboration statement

NDRS supports collaborations with academic and other institutions to use the data for a justified purpose. Enquiries, requests for statistical code used and anonymised data should be directed to [ndrs.enquiries@nhs.net](mailto:ndrs.enquiries@nhs.net).

## Strengths and limitations

- NCARDRS is one of the largest congenital anomaly registers in the world. Since 2018, coverage of congenital anomalies has been national across England (approximately 600,000 total births per year). This enables the calculation of accurate estimates of prevalence even for rare congenital anomalies. Legacy congenital anomaly registration data is held for some regions for births since 1985.
- NCARDRS collects personal identifiers and data are linked to other routinely collected administrative and health care data, allowing assessment of long-term outcome and survival over the life course of the baby, as well as associations with health inequalities and other risk factors.
- Information in NCARDRS can be linked to other national data sources, allowing the exploration of societal factors such as equity of access to treatment and clinical outcomes.
- NCARDRS provides data on all birth outcomes, including live births, stillbirths, fetal losses and terminations.
- Case-ascertainment is high for severe conditions, or those that are more frequently diagnosed antenatally or in the neonatal period. Registration and case ascertainment



1  
2  
3 in NCARDRS regions that initiated congenital anomaly registration from 2018  
4  
5 continues to develop and is progressing well.  
6  
7  
8  
9

## 10 INTRODUCTION

11  
12  
13  
14  
15  
16 Congenital anomalies are a significant source of morbidity, mortality and long-term care needs  
17  
18 in children. Approximately 2-3% of children born in Europe have a congenital anomaly (2)  
19  
20 which are defined as conditions present at birth and include structural, chromosomal, genetic  
21  
22 and biochemical conditions. Some congenital anomalies are detected during pregnancy, some  
23  
24 are found at birth, while others are diagnosed only as a baby grows older. In England and  
25  
26 Wales, congenital anomalies were the most common cause of death in the post neonatal  
27  
28 period in 2020, accounting for 36.3% of deaths (3). Globally it is estimated that 240,000 new-  
29  
30 borns die within the neonatal period as a result of congenital anomalies (4).  
31  
32

33  
34 Registration of congenital anomalies became established in many countries from the 1960s  
35  
36 and 70s as a consequence of the thalidomide tragedy and serves multiple purposes  
37  
38 supporting epidemiology and public health (5). The National Congenital Anomaly and Rare  
39  
40 Disease Registration Service (NCARDRS) is part of the National Disease Registration Service  
41  
42 (NDRS) of NHS England which collects, quality assures and analyses data on all people living  
43  
44 in England with cancer (6), congenital anomalies and rare diseases. NCARDRS curates a  
45  
46 population-based congenital anomaly registry, collecting data on the pregnancies, fetuses,  
47  
48 babies, children and adults with congenital anomalies across the whole of England. Data is  
49  
50 collected to further the understanding of the causes of congenital anomalies, to inform the  
51  
52 commission of public services, to audit health and social care and to provide information for  
53  
54 patients, their carers and clinicians on their condition.  
55  
56

57  
58 Established in 2015 in response to the UK Rare Disease Strategy (7, 8), NCARDRS assumed  
59  
60 responsibility for congenital anomaly registration in regions with an existing register and

1  
2  
3 expanded geographically to provide congenital anomaly registration across the whole  
4 country(9) (Figure 1). Prior to 2015, data collection was performed independently by regional  
5 registers operating across some areas of England, covering up to 32% of births. NCARDRS  
6 continues to host the regional registers' legacy registration data. National coverage for  
7 registration and reporting has been in place for babies born since 2018 (10).  
8  
9  
10  
11  
12  
13  
14  
15  
16  
17  
18  
19

## 20 COHORT DESCRIPTION

### 21 22 23 24 25 26 27 Study population

28  
29  
30  
31 NCARDRS registers congenital anomalies that occur in babies that are live born and stillborn,  
32 fetal losses and terminations at any gestation delivered in England. NCARDRS does not have  
33 a minimum gestation for fetal loss and registers all fetal losses reported, although in line with  
34 international standards (11) only anomalies that occur in live births, stillbirths, terminations at  
35 any gestation and fetal losses between 20-24 completed weeks of gestation are included in  
36 prevalence reporting(12, 13). There are approximately 600,000 live births and stillbirths in  
37 England every year. There is no upper age limit and information can be added for children as  
38 they grow older Information on survival and vital status is updated at least annually.  
39  
40  
41  
42  
43  
44  
45  
46  
47

48 Inclusion and exclusion criteria for registration of congenital anomalies in NCARDRS follow  
49 internationally recognised formats (11) and all registrations are coded to international  
50 standards. Anomalies are clinically coded to international standards using the World Health  
51 Organisation's International Classification of Diseases 10<sup>th</sup> revision (ICD-10)(14) with the  
52 British Paediatric Association (BPA) Adaptation, which gives supplementary one-digit  
53 extensions to ICD-10 codes to allow greater specificity of coding (11). Inclusion criteria are  
54  
55  
56  
57  
58  
59  
60

1  
2  
3 based on international guidance (11) predominantly covering the Q chapter in ICD-10. A  
4 detailed summary of the current inclusion and exclusion criteria is presented in Table S1 in  
5 the supplementary materials. NCARDRS excludes cases with an isolated minor anomaly as  
6 specified by the European network of population-based registries for the epidemiological  
7 surveillance of congenital anomalies (EUROCAT) (11). However, if minor anomalies occur in  
8 association with other anomalies, then these are registered.  
9  
10  
11  
12  
13  
14  
15  
16  
17  
18  
19

## 20 Registration model and source data

21  
22  
23 NCARDRS employs a multisource, event-based registration model. Over the life course of a  
24 patient, NCARDRS can be notified antenatally, at birth or in the neonatal period and beyond  
25 as the child is treated by various paediatric specialist services. Registration data are  
26 processed, held on a custom-built live application, and regularly cloned to a separate  
27 PostgreSQL database which creates regular snapshots of data for analysis, reporting and data  
28 release (Figure 2).  
29  
30  
31  
32  
33  
34  
35

36 The data collected by NCARDRS come from a range of sources including maternity units,  
37 multidisciplinary team meetings, postmortem reports, molecular testing results, treatment  
38 records, hospital patient administration systems, clinical data systems, national data sets  
39 describing hospital activity, clinical biochemistry and genetics laboratories. Hospital trusts,  
40 including all trusts with a maternity or paediatric service, submit data which are processed and  
41 combined by trained registration officers into a comprehensive clinical record of each baby  
42 and anomaly.  
43  
44  
45  
46  
47  
48  
49  
50

51 Data can be submitted at the individual case-level or in large data extracts from clinical  
52 management data systems. Custom-built extracts from neonatal clinical data management  
53 systems (BadgerNet), including remote access to the record itself, are available for 94% of  
54 the trusts with a neonatal unit in England. Extracts of relevant data from fetal medicine  
55 software systems including fetal medicine (Viewpoint; Astraia) and specific services  
56  
57  
58  
59  
60

1  
2  
3 (HeartSuite) have been developed in conjunction with software suppliers; these extracts are  
4 produced and submitted to NCARDRS by the provider.  
5  
6

7  
8 Information from providers is combined with routinely collected national data utilised for both  
9 data quality and case-ascertainment purposes. Linkage is conducted through NHS number  
10 or through date of birth, full name and address. Cases with defined ICD-10 codes that have  
11 been validated for accuracy are identified from Hospital Episode Statistics (HES) for  
12 ascertainment purposes. Death certificate data from the Office for National Statistics (ONS) is  
13 provided to NCARDRS monthly for children born alive after 1<sup>st</sup> January 2018 and where a  
14 relevant ICD-10 coded condition (within a specified range) is listed as a cause of death.  
15 Information about babies that were born alive or stillborn after 24 weeks gestation (civilly  
16 registrable in England) is supplemented using birth registration information supplied by the  
17 ONS.  
18  
19  
20  
21  
22  
23  
24  
25  
26  
27  
28  
29  
30  
31  
32

### 33 Data processing

34  
35  
36 Once received, data are processed by trained registration officers. Processing involves  
37 manual extraction of clinical information from clinical reports and letters or free text comments  
38 in clinical software systems. Registration officers require detailed knowledge of congenital  
39 anomalies, clinical coding and clinical pathways for the range of different conditions collected.  
40 Further information is requested from the relevant clinician or obtained by direct interrogation  
41 of patient records via secure remote access to clinical software systems or clinical documents  
42 where this is available.  
43  
44  
45  
46  
47  
48  
49

50  
51 Data are input onto the data management system in two ways: 1) data on individual patients  
52 submitted by providers are assessed by trained registration officers and manually entered or  
53 2) data from electronic sources are loaded via a semi-automatic process known as the data  
54 waterfall (Figure 2). Most cases consist of information processed by both methods.  
55  
56  
57  
58  
59  
60

## Data structure

Registration is framed at the level of the anomaly, baby, pregnancy and birth mother. The data are organised into 5 main tables: mother, pregnancy, baby, anomaly and test, with one-to-many relationships across all. Each table contains a primary key that uniquely identifies records within that table and allows joins between tables. A baby and a mother are each assigned a unique identifier. The data items in the base tables are organised into a series of custom-built analytical views. Registration records are never closed and new events can be added if new information is submitted.

## Key data fields

Detailed clinical and demographic information on the mother, baby, anomaly and pregnancy is recorded (Table 2). Multiple anomalies can be registered against a baby, each with different evidence and confirmation status.

NCARDRS works closely with the NHS Fetal Anomaly Screening Programme (FASP) to audit the detection of the 15 conditions included. To facilitate this audit, more extensive information on antenatal screening and the nature and timing of diagnostic testing is collected for these conditions and other closely related or similar conditions. The conditions that are covered by this enhanced registration include severe cardiac anomalies and trisomy 13, trisomy 18 and trisomy 21, along with neural tube defects, lethal skeletal dysplasia, cleft lip+/palate, bilateral renal agenesis, exomphalos, gastroschisis and congenital diaphragmatic hernia (see Table S1 in the supplementary materials).

## Data Quality

Automatic and manual quality checks are embedded into the registration process at points of entry, at the level of the individual record and on the birth cohort as a whole prior to finalisation of the data for reporting. As well as internal data quality indicators (DQIs), the data are evaluated against DQIs for international bodies against known targets(15). For example, the prevalence of anencephaly is reported as an indicator of ascertainment of conditions detected at earlier gestations. Other DQIs focus on the accuracy of diagnosis, for example the number of babies with more than one anomaly, or the prevalence of selected codes that have used the BPA extension code in addition to the ICD-10 code.

## Patient and public involvement

Patients groups and third sector organisations representing patients were involved in the design of this register-based cohort and were members of an expert committee of stakeholders made up of academics, clinicians, third sector organisation and patient interest groups that oversaw the formation of NCARDRS.

## Ethical approval and governance arrangements

NCARDRS has legal permission to collect patient-level data on those with a confirmed or suspected congenital anomaly or rare disease for specified purposes, without consent, to use it to protect the health of the population. Data are collected under legal instructions known as Directions, from the Secretary of State for Health and Social Care, under section 254 of the Health and Social Care Act 2012 (2012 Act) (16). Strict technical and contractual controls are put in place to prevent unauthorized access and use of the data, with staff undergoing regular training on data protection and information governance.

## FINDINGS TO DATE

As of June 2023, NCARDRS held information on 117,682 mothers and 121,184 babies born in England since 2015. Table 1 shows the number of babies and other characteristics registered in regions with full congenital anomaly registration coverage by year of birth.

NCARDRS currently collects data on more than 1,000 different congenital anomalies, many of which are rare diseases, and provides expert analysis and interpretation of the data across a wide range of national and international functions. The data are available as a source of intelligence for clinicians, public health, health-care performance, basic and applied research, patient groups, academics and commissioning and industry partners. A summary of the data is published each year describing congenital anomalies in England in the context of prevalence reported by anomaly group, timing of diagnosis and important public health indicators such as maternal age and infant mortality (10, 17-19). In 2020, NCARDRS reported a total of 13,065 babies with one or more confirmed or probable congenital anomalies in 589,454 total births (live births and stillbirths), giving an overall birth prevalence of 221.7 per 10,000 total births (95% confidence intervals (CI) 217.9 - 225.5). or 1 for every 45 births (20). The rate of perinatal mortality associated with a congenital anomaly was highest for genetic disorders (3.1 per 10,000 total births, 95% CI 2.7-3.6), followed by congenital heart anomalies (2.8 per 10,000 total births, 95% CI 2.4-3.2). Infant mortality rate was highest for congenital heart anomalies (4.9 per 10,000 live births, 95% CI 4.4-5.5), followed by genetic conditions (3.0 per 10,000 live births, 95% CI 2.6-3.5). The rate of genetic conditions in babies born to women over 40 years old was almost 7 times higher relative to babies born to mothers under 20 years old (risk ratio equal to 6.9, 95% CI 5.2-9.2).

Congenital anomaly registration data for England is submitted to international bodies to allowing pooling of data across a wider geographical area to support analysis into causes of these rare conditions and how to prevent them. Data is submitted annually to EUROCAT and

1  
2  
3 to the International Clearinghouse for Birth Defects Surveillance and Research (ICHBDSR).  
4  
5 Surveillance is performed annually using internationally recognised tools to identify potential  
6  
7 clusters of anomalies and changes in trends (21).  
8  
9

10 NCARDRS works closely with NHS Screening Programmes delivering service evaluation for  
11  
12 antenatal and new-born screening services. NCARDRS audits the detection of the conditions  
13  
14 included in the Fetal Anomaly Screening Programme (FASP) (see Table S1 in the  
15  
16 supplementary materials) and, to enable this, these conditions are subject to enhanced  
17  
18 registration and active ascertainment. By linking information at patient level, NCARDRS  
19  
20 creates a longitudinal record of the screening and diagnostic pathway for each mother, fetus,  
21  
22 or baby, enabling analysis of the efficacy of the tests, the behavioural choices on the pathway,  
23  
24 and the operational standards of the service. NCARDRS have recently published the first  
25  
26 national study of fetal anomaly ultrasound scan detection rates in England (22). The data is  
27  
28 used to provide reliable information about the quality of screening services at local, regional  
29  
30 and national level and contributes towards the safety and effectiveness of screening services.  
31  
32 Each screening provider receives a report detailing hospital-level detection rates and also  
33  
34 individual case-level detection status to allow further clinical audit and identify training  
35  
36 requirements. NCARDRS is supporting the NHS evaluative roll-out of non-invasive prenatal  
37  
38 testing (NIPT) for Edwards' syndrome, Patau's syndrome, and Down's syndrome in England  
39  
40 (23). Routine laboratory surveillance is conducted on a monthly, quarterly and annual level,  
41  
42 and test performance will be evaluated by linking laboratory and registration data.  
43  
44  
45

46 At the start of the COVID-19 pandemic, NCARDRS informed the production of the Shielded  
47  
48 Patient List (SPL) (24) by identifying individuals living with congenital anomalies and selected  
49  
50 rare diseases that may have been at increased risk from COVID-19 infection and NCARDRS  
51  
52 will support the continued evaluation of vaccines against COVID-19 in pregnancy (25).  
53  
54

55 Many publications use datasets that predate NCARDRS including the legacy regional  
56  
57 registers. NCARDRS data has been used to examine the epidemiology of congenital  
58  
59 anomalies across Europe including Dandy-Walker syndrome (26), VACTERL association (27,  
60



1  
2  
3 28), neural tube defects(29), aplasia cutis (30) achondroplasia (31) and vascular disruption  
4 anomalies (32). Studies aim to improve outcomes of babies with a congenital anomaly and to  
5 inform policy so that some may be prevented, for example to justify the fortification of flour  
6 with folic acid (29). Recently, the UK government announced plans for the fortification of flour  
7 with folic acid to reduce neural tube defects (33). NCARDRS will support the evaluation and  
8 monitoring of the impact of implementation of this policy (34).  
9  
10  
11  
12  
13  
14

## 15 16 17 **STRENGTHS AND LIMITATIONS:**

### 18 19 20 21 **National Coverage**

22  
23  
24  
25 The key strength of the NCARDRS data set is its national coverage across a large birth  
26 population. NCARDRS is the largest register in Europe (35) in both size of population and  
27 representativeness. With complete population coverage of pregnancies from 2018 onwards,  
28 the data are representative and comprehensive, capitalising on the centralised nature of  
29 English health care. Registration records are never closed, and data can continue to passively  
30 accumulate, enriching each record and facilitating the potential identification of future  
31 syndromes or providing more information on the phenotypic manifestations of genetic  
32 differences identified later in life.  
33  
34  
35  
36  
37  
38  
39  
40

### 41 42 43 **Standardised disease coding and data entry**

44  
45  
46 The development of NCARDRS has demonstrated that it is possible to conduct national  
47 registration on a large population using standardised approaches to data collection and  
48 management, disease coding, data classification, analysis and reporting. Data are coded  
49 consistently across the country and regions can be compared, allowing the identification of  
50 clusters and geographical disparities which may be a result of population demographics, social  
51 determinants of health or local exposure.  
52  
53  
54  
55  
56  
57  
58  
59  
60

## Ascertainment

National prevalence in England for 2018-2020 is consistent with European surveillance data for the same time period (excluding data for England) across most major congenital anomaly groups (Figure 3). The prevalence of severe anomalies, such as severe congenital heart, abdominal wall, oro-facial cleft, respiratory and genetic conditions was higher than the European average. These anomaly subgroups include FASP-conditions and so are subject to enhanced registration. Their higher prevalence reflects the integration of clinical audit in NCARDRS and demonstrates the impact of clinical engagement on data quality and ascertainment. The England national prevalence estimates for all cardiac conditions, limb anomalies and congenital anomalies of the kidney and urinary tract (CAKUT) conditions are lower than the average for other European registers. This likely reflects some under-ascertainment of anomalies that are predominantly confirmed postnatally in regions of NCARDRS new to reporting(13).

Across England, there is some variation in the prevalence of different anomaly groups depending on the length of time registration has been established, reflecting developing ascertainment in regions new to congenital anomaly registration particularly for anomalies that are more frequently identified postnatally (13). As registration becomes embedded and ascertainment increases, differences in prevalence because of data collection should dissipate, revealing true regional differences, if they exist.

## Timeliness of data collection

Babies with a congenital anomaly are first registered by NCARDRS approximately 12 months after their expected date of delivery. This time lag allows for the notification of outcome of the pregnancy and a confirmatory diagnosis after delivery along with the notification of other relevant postnatal information and follow-up if required. Finalised delivery year cohorts are available approximately 14 to 18 months following the end of a delivery year e.g., babies

1  
2  
3 delivered in 2021 would be reported on in 2023. Recent advances in the automated processing  
4 of defined data feeds (e.g. fetal medicine software system extracts) aim to improve the  
5 timeliness of data by reducing the time lag.  
6  
7  
8  
9

## 10 Risk factor information

11  
12  
13  
14 Information on the demographics of the mother is collected for each pregnancy and include  
15 ethnicity, Body Mass Index, illnesses or medications, folic acid intake and other lifestyle factors  
16 such as smoking. This information can be supplemented using data linkage to examine other  
17 factors, including social deprivation measured at the area-level through deprivation scores for  
18 mother's residential address at delivery,  
19  
20  
21  
22  
23  
24  
25  
26  
27

## 28 FUTURE WORK

29  
30  
31  
32 Planned improvements to the timeliness of data reporting and continued improvement to  
33 developing ascertainment for new regions and completeness of fields will further improve data  
34 quality. As the service matures, new data sources will be added to improve data quality or  
35 ascertainment. Proximity to the more established cancer registration service allows the  
36 register to build on synergies in data management, analytical infrastructure and data liaison.  
37  
38 Transition to NHS England has situated NCARDRS closer to clinical providers and  
39 commissioning services which should improve data access and facilitate linkage to a wider  
40 network of data e.g. Maternity Services Dataset in NHS England. The inclusion of primary care  
41 data would be an obvious improvement to the ascertainment of postnatally diagnosed  
42 conditions.  
43  
44  
45  
46  
47  
48  
49  
50  
51  
52

53  
54 Linkage to other datasets provides vital information on survival and health outcomes for these  
55 children throughout their life course. Cancer registration data collected by NDRS has been  
56 linked to the community prescriptions dataset (36) and linkage with the congenital anomaly  
57 registration data is in progress. This could provide information on possible drug interactions  
58  
59  
60

1  
2  
3 and potential teratogens. Further linkage is being pursued with the Maternity Services Dataset,  
4 with the aim to facilitate registration of cases and enhance data completeness for key  
5 analytical fields. Linkage to other disease registers, subject to adequate consenting materials  
6 and approvals, is possible and could provide valuable information on health outcomes for  
7 children with congenital anomalies.  
8  
9  
10  
11  
12  
13  
14  
15  
16  
17  
18

## 19 CONCLUSIONS

20  
21  
22  
23 If the thalidomide scandal of the 1960s prompted the establishment of congenital anomaly  
24 registration to understand the causes of congenital anomalies, the COVID-19 pandemic  
25 amplified the need to be able to identify and protect individuals living with conditions that may  
26 put them at increased risk compared to the general population. NCARDRS' congenital  
27 anomaly register collates information across the full patient pathway as the pregnancy  
28 progresses and the child grows. The value of this dataset in supporting clinical audits and  
29 evaluating service delivery is proven. This population-based national register – currently the  
30 largest data collection of its kind globally – has a critical role in supporting the epidemiology  
31 and monitoring of disease trends, investigating the causes of these conditions, evaluating the  
32 outcome and providing this crucial information to parents, patients and clinicians and to clinical  
33 and service commissioners so these children have what they need as they grow.  
34  
35  
36  
37  
38  
39  
40  
41  
42  
43  
44  
45  
46  
47  
48  
49

## 50 ACKNOWLEDGEMENTS

51  
52  
53 Thanks to the registration teams and associated functions in NDRS who register the data and  
54 the notifiers across the NHS and other healthcare organisations who send NDRS data. This  
55 work uses data that has been provided by patients, the NHS and other health care  
56  
57  
58  
59  
60

1  
2  
3 organisations as part of patient care and support. The data are collated, maintained and quality  
4 assured by the National Disease Registration Service, which is part of NHS England.  
5  
6  
7  
8  
9

## 10 REFERENCES

- 15 1. NHS England. Data Access Request Service (DARS): process 2022 [Available from:  
16 [https://digital.nhs.uk/services/data-access-request-service-dars/data-access-request-service-dars-](https://digital.nhs.uk/services/data-access-request-service-dars/data-access-request-service-dars-process)  
17 [process](https://digital.nhs.uk/services/data-access-request-service-dars/data-access-request-service-dars-process).  
18
- 19 2. Boyle B, Addor MC, Arriola L, Barisic I, Bianchi F, Csaky-Szunyogh M, et al. Estimating Global  
20 Burden of Disease due to congenital anomaly: an analysis of European data. Archives of disease in  
21 childhood Fetal and neonatal edition. 2018;103(1):F22-F8.
- 22 3. ONS. Child and infant mortality in England and Wales: 2020. Office for National Statistics;  
23 2022.
- 24 4. World Health Organisation. Congenital disorders 2023 [Available from:  
25 [https://www.who.int/health-topics/congenital-anomalies#tab=tab\\_3](https://www.who.int/health-topics/congenital-anomalies#tab=tab_3)  
26
- 27 5. Dolk H. EUROCAT: 25 years of European surveillance of congenital anomalies. Archives of  
28 disease in childhood Fetal and neonatal edition. 2005;90(5):F355-8.
- 29 6. Henson KE, Elliss-Brookes L, Coupland VH, Payne E, Vernon S, Rous B, et al. Data Resource  
30 Profile: National Cancer Registration Dataset in England. Int J Epidemiol. 2020;49(1):16-h.
- 31 7. Department for Health. The UK Strategy for Rare diseases In: Health UDo, editor. 2013.
- 32 8. CMO. Annual Report of the Chief Medical Officer 2011: On the State of the Public's Health  
33 2011.
- 34 9. Stevens S, Miller N, Rashbass J. Development and progress of the National Congenital  
35 Anomaly and Rare Disease Registration Service. Arch Dis Child. 2018;103(3):215-7.
- 36 10. NCARDRS. National Congenital Anomaly and Rare Disease Registration Service Congenital  
37 Anomaly Statistics Report 2018. UK Government: Public Health England; 2020. Report No.: PHE  
38 publications gateway number: GW-1445.
- 39 11. EUROCAT. EUROCAT Guide 1.4: Instruction for the registration of congenital anomalies.  
40 University of Ulster; 2013 Last update version 15/11/2019.
- 41 12. EUROCAT. [https://eu-rd-platform.jrc.ec.europa.eu/eurocat/eurocat-data/prevalence\\_en](https://eu-rd-platform.jrc.ec.europa.eu/eurocat/eurocat-data/prevalence_en)  
42 2021 [  
43
- 44 13. NCARDRS. National Congenital Anomaly and Rare Disease Registration Service Congenital  
45 Anomaly Statistics Report 2019. UK Government: Public Health England; 2021. Report No.: PHE  
46 publications gateway number: GOV-9201.
- 47 14. World Health Organization. ICD-10: International Statistical Classification of Diseases and  
48 Related Health Problems. Geneva: World Health Organization; 2010.
- 49 15. Loane M, Dolk H, Garne E, Greenlees R, Group aEW. EUROCAT Data Quality Indicators for  
50 Population-Based Registries for Congenital Anomalies. Birth Defects Research. 2011;91:S23-S30.
- 51 16. DHSC. National Disease Registries Directions 2021. In: Care DoHS, editor. London, UK2021.
- 52 17. NCARDRS. National Congenital Anomaly and Rare Disease Registration Service Congenital  
53 Anomaly Statistics Report 2015. UK Government: Public Health England; 2017. Report No.: PHE  
54 publications gateway number: GW-1445.
- 55 18. NCARDRS. National Congenital Anomaly and Rare Disease Registration Service Congenital  
56 Anomaly Statistics Report 2016. UK Government: Public Health England; 2018. Report No.: PHE  
57 publications gateway number: GW-1445.  
58  
59  
60

19. NCARDRS. National Congenital Anomaly and Rare Disease Registration Service Congenital Anomaly Statistics Report 2017. UK Government: Public Health England; 2019. Report No.: PHE publications gateway number: GW-1445.
20. NCARDRS. National Congenital Anomaly and Rare Disease Registration Service Congenital Anomaly Statistics Report 2020. NHS Digital; 2022.
21. Loane M, Dolk H, Kelly A, Teljeur C, Greenlees R, Densem J, et al. Paper 4: EUROCAT statistical monitoring: identification and investigation of ten year trends of congenital anomalies in Europe. *Birth defects research Part A, Clinical and molecular teratology*. 2011;91 Suppl 1:S31-43.
22. Haw S, Currie D, Eadie D, Pearce J, MacGregor A, Stead M, et al. The impact of the point-of-sale tobacco display ban on young people in Scotland: before-and-after study. *Public Health Research*. Southampton (UK)2020.
23. Public Health England. Screening for Down's syndrome, Edwards' syndrome and Patau's syndrome: NIPT 2021.
24. NHS Digital. Shielded Patient List 2020 [Available from: <https://digital.nhs.uk/coronavirus/shielded-patient-list>].
25. Immunisation and Vaccine-Preventable Diseases Division. Protocol for the national surveillance and safety analysis of coronavirus (COVID-19) vaccination in pregnancy. Published 25 November 2021: UK Health Security Agency; 2021.
26. Santoro M, Coi A, Barisic I, Garne E, Addor MC, Bergman JEH, et al. Epidemiology of Dandy-Walker Malformation in Europe: A EUROCAT Population-Based Registry Study. *Neuroepidemiology*. 2019;53(3-4):169-79.
27. van de Putte R, van Rooij I, Marcelis CLM, Guo M, Brunner HG, Addor MC, et al. Spectrum of congenital anomalies among VACTERL cases: a EUROCAT population-based study. *Pediatr Res*. 2020;87(3):541-9.
28. Wertelecki W. Chernobyl radiation-congenital anomalies: A persisting dilemma. *Congenit Anom (Kyoto)*. 2021;61(1):9-13.
29. Morris JK, Addor MC, Ballardini E, Barisic I, Barrachina-Bonet L, Braz P, et al. Prevention of Neural Tube Defects in Europe: A Public Health Failure. *Front Pediatr*. 2021;9:647038.
30. Coi A, Barisic I, Garne E, Pierini A, Addor MC, Aizpurua Atxega A, et al. Epidemiology of aplasia cutis congenita: A population-based study in Europe. *J Eur Acad Dermatol Venereol*. 2023;37(3):581-9.
31. Coi A, Santoro M, Garne E, Pierini A, Addor MC, Alessandri JL, et al. Epidemiology of achondroplasia: A population-based study in Europe. *Am J Med Genet A*. 2019;179(9):1791-8.
32. Morris JK, Wellesley D, Limb E, Bergman JEH, Kinsner-Ovaskainen A, Addor MC, et al. Prevalence of vascular disruption anomalies and association with young maternal age: A EUROCAT study to compare the United Kingdom with other European countries. *Birth Defects Res*. 2022;114(20):1417-26.
33. Folic acid added to flour to prevent spinal conditions in babies. [press release]. 20 September 2021 2021.
34. Broughan JM, Martin D, Higgins T, Swan G, Cullum A, Kurinczuk JJ, et al. Prevalence of neural tube defects in England prior to the mandatory fortification of non-wholemeal wheat flour with folic acid: a population-based cohort study. Submitted.
35. EUROCAT. Coverage of the European live births, Birth year 2015, by EUROCAT full or associate member registries (January 2020). 2020.
36. Henson KE, Brock R, Shand B, Coupland VH, Ellis-Brookes L, Lyratzopoulos G, et al. Cohort profile: prescriptions dispensed in the community linked to the national cancer registry in England. *BMJ open*. 2018;8(7):e020980.

1  
2  
3 Figure 1 The regional structure of NCARDRS and the proportion of the birth population of  
4 England that was covered by congenital anomaly registration.  
5  
6  
7

8 Figure 2 : Schematic describing the multisource registration process used for congenital  
9 anomalies in England.  
10  
11  
12

13 Figure 3 The prevalence of anomaly groups in England compared to EUROCAT registers  
14 excluding English registers (2018-2020) [data downloaded 24<sup>th</sup> April 2023 from EUROCAT,  
15  
16  
17  
18  
19  
20  
21  
22  
23  
24  
25  
26  
27  
28  
29  
30  
31  
32  
33  
34  
35  
36  
37  
38  
39  
40  
41  
42  
43  
44  
45  
46  
47  
48  
49  
50  
51  
52  
53  
54  
55  
56  
57  
58  
59  
60  
1<sup>st</sup> August 2022 NCARDRS]

peer review only

Table 1 The number of pregnancies, babies and anomalies recorded registered since NCARDRS has been in operation until 2020 Data extracted 13th June 2023.

|                                                                           | <b>2015</b> | <b>2016</b> | <b>2017</b> | <b>2018</b> | <b>2019</b> | <b>2020</b> |
|---------------------------------------------------------------------------|-------------|-------------|-------------|-------------|-------------|-------------|
| Number of regions reporting                                               | 4           | 7           | 7           | 10          | 10          | 10          |
| Number of pregnancies with babies with a congenital anomaly of any status | 2,915       | 9,524       | 9,882       | 20,036      | 19,636      | 18,440      |
| Number of babies with a congenital anomaly of any status                  | 2,932       | 9,574       | 9,937       | 20,145      | 19,767      | 18,541      |
| Number of mothers                                                         | 2,908       | 9,506       | 9,868       | 20,007      | 19,611      | 18,416      |
| Total number of anomalies                                                 | 5,902       | 18,839      | 18,803      | 35,483      | 34,500      | 33,344      |



|                                                              |         |         |         |         |         |         |
|--------------------------------------------------------------|---------|---------|---------|---------|---------|---------|
| Total number of confirmed and probable anomalies             | 5,432   | 15,819  | 15,316  | 28,282  | 25,988  | 25,617  |
| Birth population with active congenital anomaly registration | 141,474 | 329,301 | 320,013 | 628,171 | 614,952 | 589,454 |

NOTE : the numbers may differ from published estimates at point of reporting because of continued accumulation of data

Table 2: Summary of key data items available for each congenital anomaly registration

| Mother             | Pregnancy              | Baby                           | Anomaly                                       | Test <sup>[1]</sup> |
|--------------------|------------------------|--------------------------------|-----------------------------------------------|---------------------|
| Patient identifier | Pregnancy identifier   | Patient identifier             | Anomaly identifier                            | Test date           |
| NHS number         | Expected Delivery Date | NHS number                     | Confirmation Status of anomaly <sup>[2]</sup> | Test type           |
| Date of birth      | Pregnancy outcome      | Sex                            | ICD 10 & BPA extension code                   | Test result(s)      |
| Ethnicity          | Delivery information   | Date of birth                  | Description of the anomaly                    | Test provider       |
| Country of birth   | Screening details      | Gestational length at delivery | Gestation first suspected                     | Test requestor      |
| Vital status       | Body Mass Index        | Birth weight (g)               | Gestation at confirmation                     | Ultrasound markers  |

|                                                          |                                 |                                                              |                                          |                              |            |
|----------------------------------------------------------|---------------------------------|--------------------------------------------------------------|------------------------------------------|------------------------------|------------|
| 1<br>2<br>3<br>4<br>5<br>6<br>7<br>8<br>9<br>10<br>11    | Previous births and pregnancies | Smoking status at booking, alcohol and substance use         | Birth order if from a multiple pregnancy | Diagnostic method            | Indication |
| 12<br>13<br>14<br>15                                     |                                 | Maternal illness status                                      | Method of delivery                       | Aetiology of the anomaly/ies |            |
| 16<br>17                                                 |                                 | Folic acid intake                                            | Surgical status                          |                              |            |
| 18<br>19<br>20<br>21                                     |                                 | Assisted conception status                                   | Date of death                            |                              |            |
| 22<br>23<br>24<br>25                                     |                                 | Number of fetuses                                            | Postmortem status                        |                              |            |
| 26<br>27<br>28                                           |                                 | Consanguinity                                                |                                          |                              |            |
| 29<br>30<br>31<br>32<br>33<br>34<br>35<br>36<br>37<br>38 |                                 | Deprivation (derived from postcode of residence at delivery) |                                          |                              |            |
| 39<br>40<br>41<br>42<br>43<br>44<br>45                   |                                 | Postcode at booking and at delivery                          |                                          |                              |            |

[1] Test information is only consistently registered for conditions with enhanced registration

[2] Confirmation status: Anomalies are registered according to varying degrees of certainty depending on the clinical evidence available (*confirmed, probable or suspected*). Anomalies remain at the level of *suspected* until the evidence supporting the diagnosis of the anomaly attains agreed confirmation criteria

1  
2  
3  
4  
5  
6  
7  
8  
9  
10  
11  
12  
13  
14  
15  
16  
17  
18  
19  
20  
21  
22  
23  
24  
25  
26  
27  
28  
29  
30  
31  
32  
33  
34  
35  
36  
37  
38  
39  
40  
41  
42  
43  
44  
45  
46  
47  
48  
49  
50  
51  
52  
53  
54  
55  
56  
57  
58  
59  
60

For peer review only

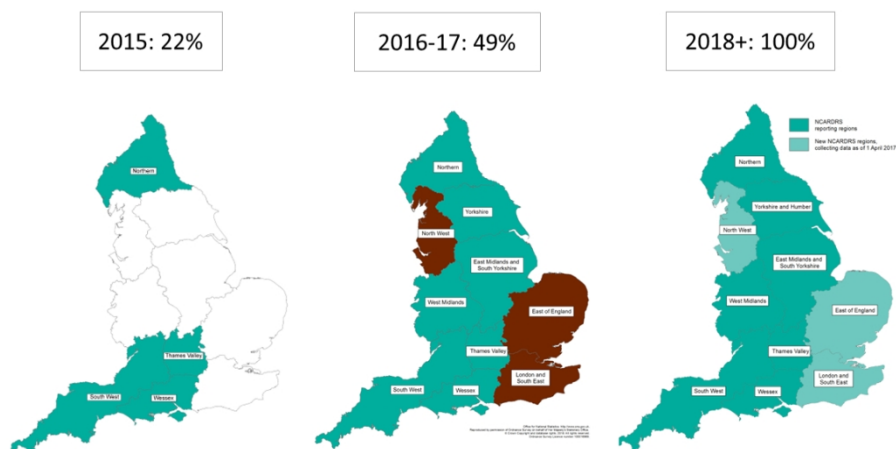

Figure 1 The regional structure of NCARDRS and the proportion of the birth population of England that was covered by congenital anomaly registration.

855x481mm (38 x 38 DPI)

1  
2  
3  
4  
5  
6  
7  
8  
9  
10  
11  
12  
13  
14  
15  
16  
17  
18  
19  
20  
21  
22  
23  
24  
25  
26  
27  
28  
29  
30  
31  
32  
33  
34  
35  
36  
37  
38  
39  
40  
41  
42  
43  
44  
45  
46  
47  
48  
49  
50  
51  
52  
53  
54  
55  
56  
57  
58  
59  
60

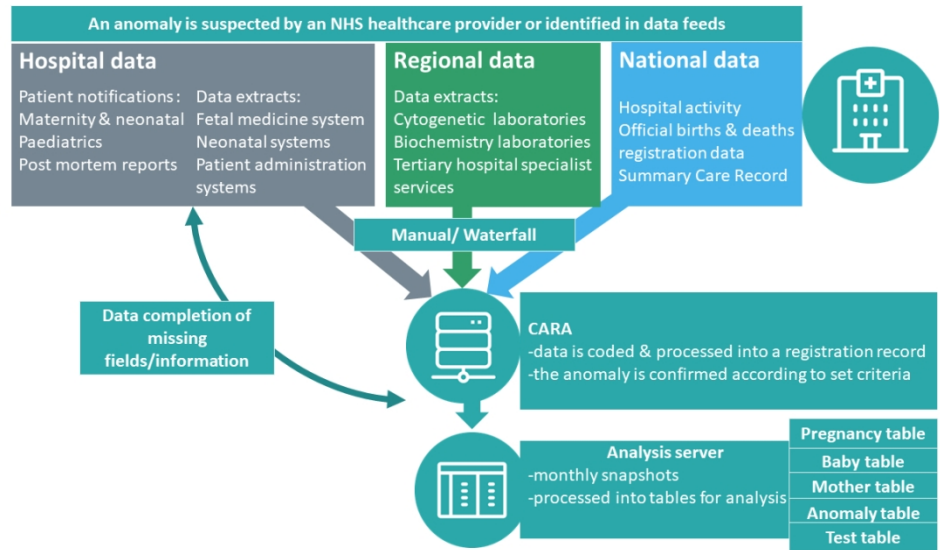

Figure 2 : Schematic describing the multisource registration process used for congenital anomalies in England.

855x481mm (38 x 38 DPI)

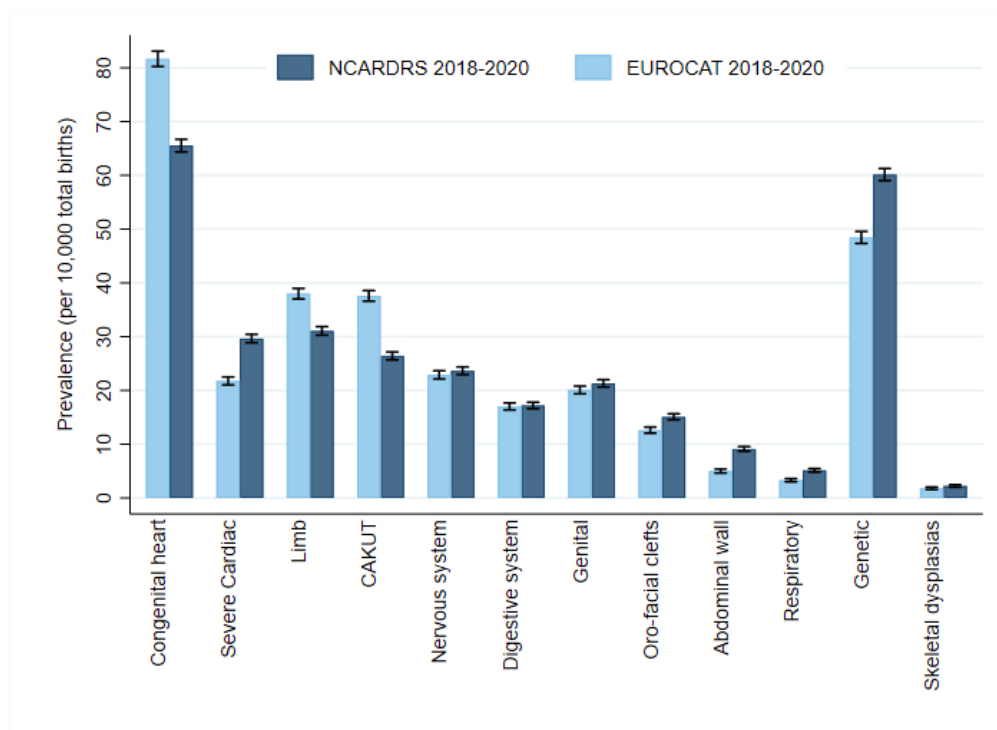

Figure 3 The prevalence of anomaly groups in England compared to EUROCAT registers excluding English registers (2018-2020) [data downloaded 24th April 2023 from EUROCAT, 1st August 2022 NCARDS]

466x338mm (38 x 38 DPI)

**Table S1** NCARDS inclusion and exclusion criteria for registerable congenital anomalies

| Anomaly type             | Routine inclusion (per ICD-10 code blocks)                | Inclusions subject to criteria                                                                                                                                                                                            | Exclusions                                                                                                                                                                                                                                                                                         | Differences with EUROCAT                                                                                                                                                            | Enhanced registration                                                                        |
|--------------------------|-----------------------------------------------------------|---------------------------------------------------------------------------------------------------------------------------------------------------------------------------------------------------------------------------|----------------------------------------------------------------------------------------------------------------------------------------------------------------------------------------------------------------------------------------------------------------------------------------------------|-------------------------------------------------------------------------------------------------------------------------------------------------------------------------------------|----------------------------------------------------------------------------------------------|
| Nervous system anomalies | Q00-Q07<br>Congenital malformations of the nervous system | MEASUREMENT / SEVERITY<br>Q02 Microcephaly<br>Q03.8 (part) Congenital ventriculomegaly [of lateral ventricle(s)]<br>Q04.32 Reduction anomalies of cerebellum<br><br>CLINICAL SIGNIFICANCE<br>Q04.61 (part) Arachnoid cyst | EXCLUDE IN ISOLATION<br>Q0780 Jaw-winking syndrome<br>Q0782 Crocodile tears<br><br>EXCLUDE always<br>Q04.6 (part) Porencephaly                                                                                                                                                                     | Q04.6 (part) Porencephaly - EUROCAT inclusion but NCARDS excludes<br><br>Q04.61 Single congenital cerebral cyst - EUROCAT exclusion in isolation but NCARDS includes Arachnoid cyst | YES<br>Q00* Anencephaly and similar malformations<br>Q01* Encephalocele<br>Q05* Spina bifida |
| Eye anomalies            | Q10-Q15<br>Congenital malformations of eye                | NA                                                                                                                                                                                                                        | EXCLUDE IN ISOLATION<br>Q10.1 Congenital ectropion,<br>Q10.2 Congenital entropion,<br>Q10.3 Other congenital malformations of eyelid, Q10.5 Congenital stenosis or stricture of lacrimal duct<br>Q13.2 (part) Anisocoria, congenital, Q13.5 Blue sclera<br>Minor anomalies and dysmorphic features | NA                                                                                                                                                                                  | NO                                                                                           |

| Anomaly type                 | Routine inclusion (per ICD-10 code blocks)                        | Inclusions subject to criteria                 | Exclusions                                                                                                                                                                                                                                                                                          | Differences with EUROCAT | Enhanced registration |
|------------------------------|-------------------------------------------------------------------|------------------------------------------------|-----------------------------------------------------------------------------------------------------------------------------------------------------------------------------------------------------------------------------------------------------------------------------------------------------|--------------------------|-----------------------|
| Ear, face and neck anomalies | Q16 Congenital malformations of ear causing impairment of hearing | CLINICAL SIGNIFICANCE<br>Q18.3 Webbing of neck | EXCLUDE IN ISOLATION<br>Q17* Other congenital malformations of ear Q18.0-Q18.2<br>Branchial cleft malformations, Q18.4-Q18.9 Macrostomia, Microstomia, Macrocheilia, Microcheilia, Other congenital malformations of face and neck, Dysmorphic features NOS Minor anomalies and dysmorphic features | NA                       | NO                    |



| Anomaly type                           | Routine inclusion (per ICD-10 code blocks)                | Inclusions subject to criteria                                                                                                                                                                                                                                                                                                                                                                              | Exclusions                                                                                                                                                                                                                                                                                                                                          | Differences with EUROCAT | Enhanced registration                                                                                                                                                                                                                                                                                                                                                                                                                                                                                                                                                                                                                                                                                                                                                    |
|----------------------------------------|-----------------------------------------------------------|-------------------------------------------------------------------------------------------------------------------------------------------------------------------------------------------------------------------------------------------------------------------------------------------------------------------------------------------------------------------------------------------------------------|-----------------------------------------------------------------------------------------------------------------------------------------------------------------------------------------------------------------------------------------------------------------------------------------------------------------------------------------------------|--------------------------|--------------------------------------------------------------------------------------------------------------------------------------------------------------------------------------------------------------------------------------------------------------------------------------------------------------------------------------------------------------------------------------------------------------------------------------------------------------------------------------------------------------------------------------------------------------------------------------------------------------------------------------------------------------------------------------------------------------------------------------------------------------------------|
| Heart and circulatory system anomalies | Q20-Q28<br>Congenital malformations of circulatory system | <p>PERSISTENCE</p> <p>Q21.10 Ostium secundum atrial septal defect (type II)</p> <p>CLINICAL SIGNIFICANCE</p> <p>Q24.8 Other specified congenital malformations of heart</p> <p>Q28.8 Other specified congenital malformations of circulatory system</p> <p>GESTATIONAL AGE AT DELIVERY &amp; PERSISTENCE / SURGERY / SEVERITY</p> <p>Q25.0 Patent ductus arteriosus, Q25.6 Stenosis of pulmonary artery</p> | <p>EXCLUDE IN ISOLATION</p> <p>Q21.11 Patent foramen ovale</p> <p>Q24.6 Congenital heart block</p> <p>Q25.41 Persistent right aortic arch</p> <p>Q26.1 Persistent left superior vena cava,</p> <p>Q26.8 (part) Absence of superior vena cava, Interrupted inferior vena cava</p> <p>Q27.0 Congenital absence and hypoplasia of umbilical artery</p> | NA                       | <p>YES</p> <p>SERIOUS CARDIAC ANOMALIES</p> <p>Q20.0 Common arterial trunk</p> <p>Q20.1 Double outlet right ventricle</p> <p>Q20.3 Transposition of the great arteries</p> <p>Q20.4 Double inlet ventricle</p> <p>Q21.2* Atrioventricular septal defect</p> <p>Q21.3, Q21.82 Tetralogy of Fallot</p> <p>Q22.0 Pulmonary valve atresia</p> <p>Q22.4 Congenital tricuspid stenosis</p> <p>Q22.5 Ebstein's anomaly</p> <p>Q22.6 Hypoplastic right heart syndrome</p> <p>Q23.0 Congenital stenosis of aortic valve</p> <p>Q23.2, Q23.3 Congenital mitral stenosis and insufficiency</p> <p>Q23.4 Hypoplastic left heart</p> <p>Q25.1* Coarctation of aorta</p> <p>Q25.2 Aortic atresia, interrupted aortic arch</p> <p>Q26.2 Total anomalous pulmonary venous connection</p> |

| Anomaly type                 | Routine inclusion (per ICD-10 code blocks)                     | Inclusions subject to criteria                                                                                                                                                                                                                  | Exclusions                                                                                                                                                                                                                                                                                                                                                                                                                                                                                 | Differences with EUROCAT | Enhanced registration                                 |
|------------------------------|----------------------------------------------------------------|-------------------------------------------------------------------------------------------------------------------------------------------------------------------------------------------------------------------------------------------------|--------------------------------------------------------------------------------------------------------------------------------------------------------------------------------------------------------------------------------------------------------------------------------------------------------------------------------------------------------------------------------------------------------------------------------------------------------------------------------------------|--------------------------|-------------------------------------------------------|
| Respiratory system anomalies | Q30-Q34<br>Congenital malformations of respiratory system      | CLINICAL SIGNIFICANCE<br>Q30.8 Other congenital malformations of nose<br><br>CAUSE<br>Q33.6 Hypoplasia and dysplasia of lung                                                                                                                    | EXCLUDE IN ISOLATION<br>Q31.5 Congenital laryngomalacia<br>Q32.0 Congenital tracheomalacia<br>Q32.2* Congenital bronchomalacia<br>Q33.00 Congenital single lung cyst<br>Q33.1* Accessory lobe of lung                                                                                                                                                                                                                                                                                      | NA                       | NO                                                    |
| Orofacial clefts             | Q35-Q37 Cleft lip and cleft palate                             | MINOR FORMS<br>Q35-Q37 Cleft lip and cleft palate                                                                                                                                                                                               | EXCLUDE IN ISOLATION<br>Q35.7 Cleft uvula                                                                                                                                                                                                                                                                                                                                                                                                                                                  | NA                       | YES<br>Q36*, Q37* Cleft lip with/without cleft palate |
| Gastrointestinal anomalies   | Q38-Q45 Other congenital malformations of the digestive system | CLINICAL SIGNIFICANCE<br>Q38.3 Other congenital malformations of tongue<br>Q44.5 Other congenital malformations of bile ducts<br><br>GESTATIONAL AGE AT DIAGNOSIS & SURGERY<br>Q43.30 Malrotation of colon<br><br>SURGERY<br>Q43.5 Ectopic anus | EXCLUDE IN ISOLATION<br>Q38.1 Ankyloglossia, Q38.2 Macroglossia, Q38.3 (part) Microglossia, Q38.4 (part) Congenital ranula, Q38.50 High arched palate<br>Q40.0 Congenital hypertrophic pyloric stenosis, Q40.1 Congenital hiatus hernia, Q40.21 Dysmotility of stomach<br>Q43.0* Meckel's diverticulum, Q43.20 Large intestinal dysmotility, Q43.81 Small intestinal dysmotility, Q43.82 Generalised intestinal dysmotility<br>Q44.4 Choledochal cyst<br>Q45.83 Congenital mesenteric cyst | NA                       | NO                                                    |

| Anomaly type                                         | Routine inclusion (per ICD-10 code blocks)                | Inclusions subject to criteria                                                                                                                     | Exclusions                                                                                                                                                                                                                                                                                                                                                                                                                         | Differences with EUROCAT                                                                            | Enhanced registration                 |
|------------------------------------------------------|-----------------------------------------------------------|----------------------------------------------------------------------------------------------------------------------------------------------------|------------------------------------------------------------------------------------------------------------------------------------------------------------------------------------------------------------------------------------------------------------------------------------------------------------------------------------------------------------------------------------------------------------------------------------|-----------------------------------------------------------------------------------------------------|---------------------------------------|
| Reproductive system anomalies                        | Q50-Q56<br>Congenital malformations of genital organs     | CLINICAL SIGNIFICANCE<br>Q55.6 Other congenital malformations of penis                                                                             | EXCLUDE IN ISOLATION<br>Q50.1* Developmental ovarian cyst, Q50.2 Congenital torsion of ovary, Q50.5 Embryonic cyst of broad ligament, Q52.3 Imperforate hymen, Q52.4 (part) Congenital hypertrophy of hymen, Q52.5 Fusion of labia<br>Q52.7 (part) Minor other congenital malformations of vulva<br>Q54.4 Congenital chordee<br>Q55.20 Retractable testis, Q55.21 Bifid scrotum<br><br>EXCLUDE always<br>Q53* Undescended testicle | Q52.7 (part)<br>Congenital rectovulval fistula - EUROCAT exclusion in isolation but NCARDS includes | NO                                    |
| Congenital anomalies of the kidney and urinary tract | Q60-Q64<br>Congenital malformations of the urinary system | MEASUREMENT / SEVERITY<br>Q62.0 Congenital hydronephrosis<br><br>CLINICAL SIGNIFICANCE<br>Q63.8 Other specified congenital malformations of kidney | EXCLUDE IN ISOLATION<br>Q61.0 Congenital single renal cyst<br>Q62.7* Congenital vesico-uretero-renal reflux<br>Q63.3 Hyperplastic and giant kidney                                                                                                                                                                                                                                                                                 | NA                                                                                                  | YES<br>Q60.1 Bilateral renal agenesis |

| Anomaly type                                         | Routine inclusion (per ICD-10 code blocks)        | Inclusions subject to criteria                                                                                                                                                                                                             | Exclusions                                                                                                                                                                                                                                                                                                                                                                                                                                    | Differences with EUROCAT                                                                | Enhanced registration |
|------------------------------------------------------|---------------------------------------------------|--------------------------------------------------------------------------------------------------------------------------------------------------------------------------------------------------------------------------------------------|-----------------------------------------------------------------------------------------------------------------------------------------------------------------------------------------------------------------------------------------------------------------------------------------------------------------------------------------------------------------------------------------------------------------------------------------------|-----------------------------------------------------------------------------------------|-----------------------|
| Congenital deformities of the musculoskeletal system | Q65-Q68<br>Congenital musculoskeletal deformities | <p>PERSISTENCE<br/>Q65.80 &amp; Q65.81<br/>Dysplastic hip</p> <p>CAUSE<br/>Q68.8 (part)<br/>Arthrogryposis, not otherwise specified</p>                                                                                                    | <p>EXCLUDE IN ISOLATION<br/>Q65.3-Q65.5 Congenital subluxation of hip, Q65.6*<br/>Unstable hip<br/>Q66.1-Q66.9 Congenital deformities of feet (except include talipes equinovarus)<br/>Q67* Congenital musculoskeletal deformities of head, face, spine and chest<br/>Q68.0 Congenital deformity of sternocleidomastoid muscle, Q68.10 Clinodactyly, Q68.21 Genu recurvatum, Q68.3-Q68.5<br/>Congenital bowing of femur, tibia and fibula</p> | Q65.80 & Q65.81<br>Dysplastic hip - EUROCAT exclusion in isolation but NCARDRS includes | NO                    |
| Congenital malformations of the limbs                | Q69-Q74<br>Congenital malformations of limb(s)    | <p>CLINICAL SIGNIFICANCE<br/>Q70.2 Fused toes<br/>Q70.3 Webbed toes,<br/>Q70.9 Syndactyly, unspecified<br/>Q74.2 Other congenital malformations of lower limb(s), including pelvic girdle<br/>Q74.82 Congenital undergrowth of limb(s)</p> | <p>EXCLUDE IN ISOLATION<br/>Q74.0 (part) Congenital cubitus valgus, Q74.00 Accessory carpal bone</p>                                                                                                                                                                                                                                                                                                                                          | NA                                                                                      | NO                    |

1  
2  
3  
4  
5  
6  
7  
8  
9  
10  
11  
12  
13  
14  
15  
16  
17  
18  
19  
20  
21  
22  
23  
24  
25  
26  
27  
28  
29  
30  
31  
32  
33  
34  
35  
36  
37  
38  
39  
40  
41  
42  
43  
44  
45  
46

| Anomaly type                                                          | Routine inclusion (per ICD-10 code blocks)                       | Inclusions subject to criteria                                                                                                                                                                                                                                                                                                                                                                                            | Exclusions                                                                                                                                                                                                                                                                                                                                  | Differences with EUROCAT | Enhanced registration                                                                                                                                                                                                                  |
|-----------------------------------------------------------------------|------------------------------------------------------------------|---------------------------------------------------------------------------------------------------------------------------------------------------------------------------------------------------------------------------------------------------------------------------------------------------------------------------------------------------------------------------------------------------------------------------|---------------------------------------------------------------------------------------------------------------------------------------------------------------------------------------------------------------------------------------------------------------------------------------------------------------------------------------------|--------------------------|----------------------------------------------------------------------------------------------------------------------------------------------------------------------------------------------------------------------------------------|
| Congenital malformations of other parts of the musculoskeletal system | Q75-Q79 Other congenital malformations of musculoskeletal system | <p>CAUSE</p> <p>Q75.02 Trigenocephaly</p> <p>CLINICAL SIGNIFICANCE</p> <p>Q75.8* Other specified congenital malformations of skull and face bones</p> <p>Q76.4 Other congenital malformations of spine, not associated with scoliosis</p> <p>GESTATIONAL AGE AT DIAGNOSIS</p> <p>Q79.5 (part) Congenital abdominal wall defect not otherwise specified</p> <p>CONSEQUENCE</p> <p>Q79.80 Congenital constriction bands</p> | <p>EXCLUDE IN ISOLATION</p> <p>Q75.00 (part) Brachycephaly, Q75.2 Hypertelorism, Q75.3* Macrocephaly</p> <p>Q76.0 Spina bifida occulta, Q76.43 Congenital lordosis, postural, Q76.5 Cervical rib, Q76.60 Congenital absence of rib, Q76.62 Accessory rib, Q76.71 Sternum bifidum</p> <p>Q79.5 (part) - Congenital divarication of recti</p> | NA                       | <p>YES</p> <p>Q77*/Q78* (part) Lethal and severe skeletal dysplasias e.g. Thanatophoric dysplasia, Short rib-polydactyly syndrome</p> <p>Q79.0* Congenital diaphragmatic hernia</p> <p>Q79.2 Exomphalos</p> <p>Q79.3 Gastroschisis</p> |

| Anomaly type                           | Routine inclusion (per ICD-10 code blocks)        | Inclusions subject to criteria | Exclusions                                                                                                                                                                                                                                                                                                                    | Differences with EUROCAT | Enhanced registration |
|----------------------------------------|---------------------------------------------------|--------------------------------|-------------------------------------------------------------------------------------------------------------------------------------------------------------------------------------------------------------------------------------------------------------------------------------------------------------------------------|--------------------------|-----------------------|
| Integument anomalies                   | Q80-Q84<br>Congenital malformations of integument | NA                             | EXCLUDE IN ISOLATION<br>Q82.5* Congenital non-neoplastic naevus, Q82.8 (part)<br>Dermatoglyphic anomalies, Q82.80 Abnormal palmar creases, Q82.81 Accessory skin tags<br>Q83.3 Accessory nipple<br>Q84.2 (part) Persistent lanugo, Q84.5 (part) Enlarged or hypertrophic nails, Q84.6 Other congenital malformations of nails | NA                       | NO                    |
| Phakomatoses, not elsewhere classified | Q85<br>Phakomatoses, not elsewhere classified     | NA                             | NA                                                                                                                                                                                                                                                                                                                            | NA                       | NO                    |

1  
2  
3  
4  
5  
6  
7  
8  
9  
10  
11  
12  
13  
14  
15  
16  
17  
18  
19  
20  
21  
22  
23  
24  
25  
26  
27  
28  
29  
30  
31  
32  
33  
34  
35  
36  
37  
38  
39  
40  
41  
42  
43  
44  
45  
46

| Anomaly type                            | Routine inclusion (per ICD-10 code blocks)                                                     | Inclusions subject to criteria                                                                                                                                                                                                               | Exclusions                                                               | Differences with EUROCAT | Enhanced registration |
|-----------------------------------------|------------------------------------------------------------------------------------------------|----------------------------------------------------------------------------------------------------------------------------------------------------------------------------------------------------------------------------------------------|--------------------------------------------------------------------------|--------------------------|-----------------------|
| Teratogenic syndromes                   | Q86* Congenital malformation syndromes due to known exogenous causes, not elsewhere classified | MATERNAL HISTORY & CONSEQUENCE<br>Q86.0 Fetal alcohol syndrome<br><br>KNOWN AETIOLOGY & CONSEQUENCE<br>Q86.1-Q86.8* Fetal hydantoin syndrome, Fetal warfarin syndrome, Other congenital malformation syndromes due to known exogenous causes | NA                                                                       | NA                       | NO                    |
| Other congenital malformation syndromes | Q87* Other specified congenital malformation syndromes (multiple systems)                      | NA                                                                                                                                                                                                                                           | EXCLUDE IN ISOLATION Q87.4 (part) Arachnodactyly not otherwise specified | NA                       | NO                    |
| Other anomalies                         | Q89* Other congenital malformations, not elsewhere classified                                  | NA                                                                                                                                                                                                                                           | EXCLUDE IN ISOLATION Q89.9 Congenital malformation, unspecified          | NA                       | NO                    |

| Anomaly type         | Routine inclusion (per ICD-10 code blocks)                                                                                                                                                                          | Inclusions subject to criteria                                                                          | Exclusions                                                                                                                                                                                                                                | Differences with EUROCAT                                                                                                                                                                                                    | Enhanced registration                                                      |
|----------------------|---------------------------------------------------------------------------------------------------------------------------------------------------------------------------------------------------------------------|---------------------------------------------------------------------------------------------------------|-------------------------------------------------------------------------------------------------------------------------------------------------------------------------------------------------------------------------------------------|-----------------------------------------------------------------------------------------------------------------------------------------------------------------------------------------------------------------------------|----------------------------------------------------------------------------|
| Chromosomal          | Q90-Q99<br>Chromosomal                                                                                                                                                                                              | IF REGISTRABLE ANOMALY<br>Q95* Balanced rearrangements and structural markers, not elsewhere classified | EXCLUDE always<br>Q95.0 Balanced translocation and insertion in normal individual,<br>Q95.1 Chromosome inversion in normal individual, Q95.4<br>Individuals with marker heterochromatin, Q95.5<br>Individuals with autosomal fragile site | NA                                                                                                                                                                                                                          | YES<br>Q90* Down's syndrome<br>Q91* Edwards' syndrome and Patau's syndrome |
| Congenital neoplasms | D15.1 Cardiac rhabdomyoma<br>D18.10 Cystic hygroma (congenital)<br>D21.5 Sacrococcygeal teratoma, Sacral teratoma<br>D21.9 Rhabdomyoma of other organs [i.e. not heart]<br>D48.7 Teratoma, not elsewhere classified | CLINICAL SIGNIFICANCE<br>D18.0 Haemangioma, any site, D18.1 Lymphangioma, any site                      | NA                                                                                                                                                                                                                                        | EUROCAT exclusion but NCARDS includes<br>D15.1 Cardiac rhabdomyoma, D18.0 Haemangioma, any site, D18.1 Lymphangioma, any site, D21.9 Rhabdomyoma of other organs [i.e. not heart], D48.7 Teratoma, not elsewhere classified | NO                                                                         |
| Di George syndrome   | D82.1 Di George syndrome                                                                                                                                                                                            | NA                                                                                                      | NA                                                                                                                                                                                                                                        | NA                                                                                                                                                                                                                          | NO                                                                         |



| Anomaly type                        | Routine inclusion (per ICD-10 code blocks)                          | Inclusions subject to criteria                                                                                                                                 | Exclusions                                                                            | Differences with EUROCAT               | Enhanced registration |
|-------------------------------------|---------------------------------------------------------------------|----------------------------------------------------------------------------------------------------------------------------------------------------------------|---------------------------------------------------------------------------------------|----------------------------------------|-----------------------|
| Waardenburg syndrome                | E70.30 Waardenburg syndrome                                         | NA                                                                                                                                                             | NA                                                                                    | NA                                     | NO                    |
| Cystic fibrosis                     | E84* Cystic fibrosis                                                | NA                                                                                                                                                             | NA                                                                                    | EUROCAT exclusion but NCARDRS includes | NO                    |
| Spinal muscular atrophy             | G12* Spinal muscular atrophy and related syndromes                  | NA                                                                                                                                                             | NA                                                                                    | EUROCAT exclusion but NCARDRS includes | NO                    |
| Congenital chylothorax              | NA                                                                  | NA                                                                                                                                                             | EXCLUDE IN ISOLATION<br>I89.8 Chylothorax (lymphatic);<br>J94.0 Chylothorax (chylous) | NA                                     | NO                    |
| Paralysis of vocal cords and larynx | NA                                                                  | NA                                                                                                                                                             | EXCLUDE IN ISOLATION<br>J38.0 Paralysis of vocal cords and larynx                     | NA                                     | NO                    |
| Micrognathia                        |                                                                     | SEVERITY<br>K07.0 Micrognathia                                                                                                                                 | NA                                                                                    | NA                                     | NO                    |
| Placental transfusion syndromes     | P02.3 Fetus and newborn affected by placental transfusion syndromes | INCLUDE IN ISOLATION<br>P02.3 (part) Twin reversed arterial perfusion sequence<br><br>IF REGISTRABLE ANOMALY<br>P02.3 (part) Twin-to-twin transfusion syndrome | NA                                                                                    | NA                                     | NO                    |

| Anomaly type          | Routine inclusion (per ICD-10 code blocks)          | Inclusions subject to criteria                                                                                                          | Exclusions                                                       | Differences with EUROCAT              | Enhanced registration |
|-----------------------|-----------------------------------------------------|-----------------------------------------------------------------------------------------------------------------------------------------|------------------------------------------------------------------|---------------------------------------|-----------------------|
| Congenital infections | P35.8 Congenital zika virus infection               | IF REGISTRABLE ANOMALY<br>P35.0 Congenital rubella syndrome, P35.1 Congenital cytomegalovirus infection, P37.1 Congenital toxoplasmosis | NA                                                               | NA                                    | NO                    |
| Hydrops fetalis       | P83.2 Hydrops fetalis not due to haemolytic disease | NA                                                                                                                                      | EXCLUDE always<br>P56* Hydrops fetalis due to haemolytic disease | EUROCAT exclusion but NCARDS includes | NO                    |
| Congenital hypotonia  | NA                                                  | NA                                                                                                                                      | EXCLUDE always<br>P94.2 Congenital hypotonia                     | NA                                    | NO                    |

# BMJ Open

## COHORT PROFILE : THE NATIONAL CONGENITAL ANOMALY REGISTRATION DATASET IN ENGLAND

|                                 |                                                                                                                                                                                                                                                                                                                                                                                                                                                                                                                                                                                                                                                                                                                                                                                                               |
|---------------------------------|---------------------------------------------------------------------------------------------------------------------------------------------------------------------------------------------------------------------------------------------------------------------------------------------------------------------------------------------------------------------------------------------------------------------------------------------------------------------------------------------------------------------------------------------------------------------------------------------------------------------------------------------------------------------------------------------------------------------------------------------------------------------------------------------------------------|
| Journal:                        | <i>BMJ Open</i>                                                                                                                                                                                                                                                                                                                                                                                                                                                                                                                                                                                                                                                                                                                                                                                               |
| Manuscript ID                   | bmjopen-2023-077743.R1                                                                                                                                                                                                                                                                                                                                                                                                                                                                                                                                                                                                                                                                                                                                                                                        |
| Article Type:                   | Cohort profile                                                                                                                                                                                                                                                                                                                                                                                                                                                                                                                                                                                                                                                                                                                                                                                                |
| Date Submitted by the Author:   | 09-Nov-2023                                                                                                                                                                                                                                                                                                                                                                                                                                                                                                                                                                                                                                                                                                                                                                                                   |
| Complete List of Authors:       | Broughan, Jennifer; NHS England, Data and Analytics Directorate<br>Wreyford, Ben; NHS England, Data and Analytics Directorate<br>Martin, Danielle; NHS England, Data and Analytics Directorate<br>Melis, Gabriella; NHS England, Data and Analytics Directorate<br>Randall, Kay; NHS England, Data and Analytics Directorate<br>Obaro, Ewoma; NHS England, Data and Analytics Directorate<br>Broggio, John; NHS Digital, National Disease Registration Service<br>Aldridge, Nicholas; NHS England, Data and Analytics Directorate<br>Stoianova, Sylvia; NHS England<br>Johnson, Chloe; NHS England, Data and Analytics Directorate<br>Gibbard, Donna; NHS England, Data and Analytics Directorate<br>Stevens, Sarah; NHS England<br>Fleming, Kate M; NHS England, Data & Analytics Transformation Directorate |
| <b>Primary Subject Heading</b>: | Epidemiology                                                                                                                                                                                                                                                                                                                                                                                                                                                                                                                                                                                                                                                                                                                                                                                                  |
| Secondary Subject Heading:      | Public health, Obstetrics and gynaecology, Paediatrics                                                                                                                                                                                                                                                                                                                                                                                                                                                                                                                                                                                                                                                                                                                                                        |
| Keywords:                       | EPIDEMIOLOGY, PUBLIC HEALTH, REGISTRIES, NEONATOLOGY, PAEDIATRICS, Electronic Health Records                                                                                                                                                                                                                                                                                                                                                                                                                                                                                                                                                                                                                                                                                                                  |
|                                 |                                                                                                                                                                                                                                                                                                                                                                                                                                                                                                                                                                                                                                                                                                                                                                                                               |

SCHOLARONE™  
Manuscripts

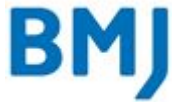

I, the Submitting Author has the right to grant and does grant on behalf of all authors of the Work (as defined in the below author licence), an exclusive licence and/or a non-exclusive licence for contributions from authors who are: i) UK Crown employees; ii) where BMJ has agreed a CC-BY licence shall apply, and/or iii) in accordance with the terms applicable for US Federal Government officers or employees acting as part of their official duties; on a worldwide, perpetual, irrevocable, royalty-free basis to BMJ Publishing Group Ltd ("BMJ") its licensees and where the relevant Journal is co-owned by BMJ to the co-owners of the Journal, to publish the Work in this journal and any other BMJ products and to exploit all rights, as set out in our [licence](#).

The Submitting Author accepts and understands that any supply made under these terms is made by BMJ to the Submitting Author unless you are acting as an employee on behalf of your employer or a postgraduate student of an affiliated institution which is paying any applicable article publishing charge ("APC") for Open Access articles. Where the Submitting Author wishes to make the Work available on an Open Access basis (and intends to pay the relevant APC), the terms of reuse of such Open Access shall be governed by a Creative Commons licence – details of these licences and which [Creative Commons](#) licence will apply to this Work are set out in our licence referred to above.

Other than as permitted in any relevant BMJ Author's Self Archiving Policies, I confirm this Work has not been accepted for publication elsewhere, is not being considered for publication elsewhere and does not duplicate material already published. I confirm all authors consent to publication of this Work and authorise the granting of this licence.

## COHORT PROFILE : THE NATIONAL CONGENITAL ANOMALY REGISTRATION DATASET IN ENGLAND

Jennifer M Broughan, Ben Wreyford, Danielle Martin, Gabriella Melis, Kay Randall, Ewoma Obaro, John Broggio, Nicholas Aldridge , Sylvia Stoianova, Chloe Johnson, Donna Gibbard, Sarah Stevens & Kate Fleming

National Congenital Anomaly and Rare Disease Registration Service, National Disease Registration Service, Data and Analytics Directorate, NHS England, 7 Wellington Pl, Whitehall Rd, Leeds LS1 4EG, UK.

Word count (not including references or abstract): 3919

Jennifer M Broughan, [Jennifer.Broughan@nhs.net](mailto:Jennifer.Broughan@nhs.net)

Ben Wreyford, [ben.wreyford@nhs.net](mailto:ben.wreyford@nhs.net)

Danielle Martin, [Danielle.Martin17@nhs.net](mailto:Danielle.Martin17@nhs.net)

Gabriella Melis, [Gabriella.Melis1@nhs.net](mailto:Gabriella.Melis1@nhs.net)

Kay Randall, [kay.randall@nhs.net](mailto:kay.randall@nhs.net)

Ewoma Obaro, [ewoma.obaro@nhs.net](mailto:ewoma.obaro@nhs.net)

John Broggio, [john.broggio@nhs.net](mailto:john.broggio@nhs.net)

Nicholas Aldridge, [nicholas.aldridge@nhs.net](mailto:nicholas.aldridge@nhs.net)

Sylvia Stoianova, [Sylvia.Stoianova@bristol.ac.uk](mailto:Sylvia.Stoianova@bristol.ac.uk)

Chloe Johnson, [Chloe.Johnson6@dhsc.gov.uk](mailto:Chloe.Johnson6@dhsc.gov.uk)

Donna Gibbard, [donna.gibbard@nhs.net](mailto:donna.gibbard@nhs.net)

Sarah Stevens, [sarah.stevens1@nhs.net](mailto:sarah.stevens1@nhs.net)

Kate M Fleming, [kate.fleming5@nhs.net](mailto:kate.fleming5@nhs.net)

Correspondence to:

Jennifer Broughan, PhD

National Disease Registration Service

NHS England

7 and 8 Wellington Pl,

1  
2  
3  
4  
5  
6  
7  
8  
9  
10  
11  
12  
13  
14  
15  
16  
17  
18  
19  
20  
21  
22  
23  
24  
25  
26  
27  
28  
29  
30  
31  
32  
33  
34  
35  
36  
37  
38  
39  
40  
41  
42  
43  
44  
45  
46  
47  
48  
49  
50  
51  
52  
53  
54  
55  
56  
57  
58  
59  
60

Whitehall Rd,  
Leeds  
LS1 4EG,  
UK.  
[Jennifer.Broughan@nhs.net](mailto:Jennifer.Broughan@nhs.net)  
Tel +44 7769282928  
ORCID 0000-0002-4450-2147

For peer review only

## ABSTRACT

### **Purpose**

The National Congenital Anomaly and Rare Disease Registration Service (NCARDRS), part of National Disease Registration Service (NDRS) in NHS England, quality assures, curates and analyses individual data on the pregnancies, fetuses, babies, children and adults with congenital anomalies and rare diseases across England. The congenital anomaly (CA) register provides a resource for patients and their families, clinicians, researchers, and public health professionals in furthering the understanding of CAs.

### **Participants**

NCARDRS registers CAs occurring in babies born alive and stillborn, fetal losses and terminations in England. NCARDRS collects data from secondary and tertiary health care providers, private providers and laboratories covering fetal medicine, maternity or paediatric services. Data describe the pregnancy, mother, baby, and anomaly. Established in 2015, NCARDRS expanded CA registration coverage from 22% of total births in England in 2015 until national coverage was achieved in 2018. Prior to 2015, data collection was performed independently by regional registers in England; this data is also held by NCARDRS.

### **Findings to date:**

NCARDRS registers approximately 21,000 babies with CAs per year with surveillance covering 600,000 total births, making it the register with the largest birth coverage globally. Data on prevalence, risk factors and survival for children with CAs are available. Data has been used in several peer-reviewed publications. Birth prevalence statistics, including public health indicators such as the association with maternal age, infant and perinatal mortality, are published annually. NCARDRS supports clinical audit for screening programmes and service evaluation.

### **Future plans:**

1  
2  
3 NCARDRS provides a valuable resource for the understanding of the epidemiology,  
4 surveillance, prevention and treatment of CAs. Currently, approximately 21,000 new  
5 registrations of babies or fetuses with suspected or confirmed CAs are added each year.  
6  
7 Identifiers are collected, enabling linkage to routinely-collected healthcare and population  
8  
9 statistics, further enhancing the value of the data.  
10  
11  
12  
13

### 14 15 Key words

16  
17  
18 Epidemiology, Public Health, Registries, neonatology, paediatrics  
19  
20

### 21 22 Strengths and limitations

- 23  
24  
25  
26
- 27 • NCARDRS is one of the largest congenital anomaly registers in the world. Since  
28 2018, coverage of congenital anomalies has been national across England  
29 (approximately 21,000 anomalies registered from 600,000 total births per year). This  
30 enables the calculation of accurate estimates of prevalence even for rare congenital  
31 anomalies. Legacy congenital anomaly registration data is held for some regions for  
32 births since 1985.  
33
  - 34 • NCARDRS collects personal identifiers and data are linked to other routinely  
35 collected administrative and health care data, allowing assessment of long-term  
36 outcome and survival over the life course of the baby, as well as associations with  
37 health inequalities and other risk factors.  
38
  - 39 • Information in NCARDRS can be linked to other national data sources, allowing the  
40 exploration of societal factors such as equity of access to treatment and clinical  
41 outcomes.  
42
  - 43 • NCARDRS provides data on all birth outcomes, including live births, stillbirths, fetal  
44 losses and terminations.  
45  
46  
47  
48  
49  
50  
51  
52  
53  
54  
55  
56  
57  
58  
59  
60



- Case-ascertainment is high for severe conditions, or those that are more frequently diagnosed antenatally or in the neonatal period. Registration and case ascertainment in NCARDRS regions that initiated congenital anomaly registration from 2018 continues to develop and is progressing well.

## INTRODUCTION

Congenital anomalies are a significant source of morbidity, mortality and long-term care needs in children. Approximately 2-3% of children born in Europe have a congenital anomaly(1) which are defined as conditions present at birth and include structural, chromosomal, genetic and biochemical conditions. Some congenital anomalies are detected during pregnancy, some are found at birth, while others are diagnosed only as a baby grows older. In England and Wales, congenital anomalies were the most common cause of death in the post neonatal period in 2020, accounting for 36.3% of deaths(2). Globally it is estimated that 240,000 newborns die within the neonatal period as a result of congenital anomalies(3).

Registration of congenital anomalies became established in many countries from the 1960s and 70s as a consequence of the thalidomide tragedy and serves multiple purposes supporting epidemiology and public health(4). The National Congenital Anomaly and Rare Disease Registration Service (NCARDRS) is part of the National Disease Registration Service (NDRS) of NHS England which collects, quality assures and analyses data on all people living in England with cancer(5), congenital anomalies and rare diseases. NCARDRS curates a population-based congenital anomaly registry, collecting data on the pregnancies, fetuses, babies, children and adults with congenital anomalies across the whole of England. Data is collected to further the understanding of the causes of congenital anomalies, to inform the commission of public services, to audit health and social care and to provide information for patients, their carers and clinicians on their condition. To achieve this NCARDRS collects data

1  
2  
3 from health care settings across England. In England, health care is publicly funded and  
4 delivered in a centralised and universal way by the National Health Service (NHS).  
5  
6

7  
8 The UK Rare Disease Strategy, developed in 2013, aimed to improve the lives of those with  
9 rare diseases, focusing on patient empowerment, identification and prevention, diagnosis and  
10 treatment and the role of research and recommended the expansion of existing data  
11 collections(6, 7). Established in 2015 in response, NCARDRS assumed responsibility for  
12 congenital anomaly registration in regions with an existing register and expanded  
13 geographically to provide congenital anomaly registration across the whole country(8) (Figure  
14 1). Prior to 2015, data collection was performed independently by regional registers operating  
15 across some areas of England, covering up to 32% of births. NCARDRS continues to host the  
16 regional registers' legacy registration data. A national congenital anomaly surveillance system  
17 was attempted by the UK Office of National Statistics (ONS) but this was closed in 2010  
18 following concerns about data quality and completeness(9). NCARDRS national coverage for  
19 registration and reporting has been in place for babies born since 2018(10).  
20  
21  
22  
23  
24  
25  
26  
27  
28  
29  
30  
31  
32  
33  
34  
35  
36  
37  
38  
39

## 40 COHORT DESCRIPTION

### 41 42 43 44 45 46 47 Study population

48  
49  
50 NCARDRS registers congenital anomalies that occur in babies that are live born and stillborn,  
51 fetal losses and terminations at any gestation delivered in England. NCARDRS does not have  
52 a minimum gestation for fetal loss and registers all fetal losses reported, although in line with  
53 international standards(11) only anomalies that occur in live births, stillbirths, terminations at  
54 any gestation and fetal losses between 20-24 completed weeks of gestation are included in  
55  
56  
57  
58  
59  
60

1  
2  
3 prevalence reporting(12, 13). There are approximately 600,000 live births and stillbirths in  
4  
5 England every year. There is no upper age limit and information can be added for children as  
6  
7 they grow older Information on survival and vital status is updated at least annually.  
8  
9

10 Inclusion and exclusion criteria for registration of congenital anomalies in NCARDRS follow  
11  
12 internationally recognised formats(11) and all registrations are coded to international  
13  
14 standards. Anomalies are clinically coded to international standards using the World Health  
15  
16 Organisation's International Classification of Diseases 10<sup>th</sup> revision (ICD-10)(14) with the  
17  
18 British Paediatric Association (BPA) Adaptation, which gives supplementary one-digit  
19  
20 extensions to ICD-10 codes to allow greater specificity of coding(11). Inclusion criteria are  
21  
22 based on international guidance(11) predominantly covering the Q chapter in ICD-10. A  
23  
24 detailed summary of the current inclusion and exclusion criteria is presented in Table S1 in  
25  
26 the supplementary materials. NCARDRS excludes cases with an isolated minor anomaly as  
27  
28 specified by the European network of population-based registries for the epidemiological  
29  
30 surveillance of congenital anomalies (EUROCAT)(11). However, if minor anomalies occur in  
31  
32 association with other anomalies, then these are registered.  
33  
34

35  
36 Denominator data is obtained from the UK Office for National Statistics (ONS). Individual level  
37  
38 birth data are available and are aggregated according to requirements.  
39  
40  
41  
42

### 43 Registration model and source data

44  
45  
46  
47 NCARDRS employs a multisource, event-based registration model. Over the life course of a  
48  
49 patient, NCARDRS can be notified antenatally, at birth or in the neonatal period and beyond  
50  
51 as the child is treated by various paediatric specialist services. Registration data are  
52  
53 processed, held on a custom-built live data management application, and regularly cloned to  
54  
55 a separate PostgreSQL database which creates regular snapshots of data for analysis,  
56  
57 reporting and data release (Figure 2).  
58  
59  
60

1  
2  
3 The data collected by NCARDRS come from a range of sources including maternity units,  
4 multidisciplinary team meetings, postmortem reports, molecular testing results, treatment  
5 records, hospital patient administration systems, clinical data systems, national data sets  
6 describing hospital activity, clinical biochemistry and genetics laboratories. Hospital trusts,  
7 including all trusts with a maternity or paediatric service, submit data which are processed and  
8 combined by trained registration officers into a comprehensive clinical record of each baby  
9 and anomaly.  
10  
11  
12  
13  
14  
15  
16  
17

18 Data can be submitted at the individual case-level or in large data extracts from clinical  
19 management data systems. Custom-built extracts from neonatal clinical data management  
20 systems (BadgerNet), including remote access to the record itself, are available for 94% of  
21 the trusts with a neonatal unit in England. Extracts of relevant data from fetal medicine  
22 software systems including fetal medicine (Viewpoint; Astraia) and specific services  
23 (HeartSuite) have been developed in conjunction with software suppliers; these extracts are  
24 produced and submitted to NCARDRS by the provider.  
25  
26  
27  
28  
29  
30  
31  
32

33 Information from providers is combined with routinely collected national data utilised for both  
34 data quality and case-ascertainment purposes. Linkage is conducted through NHS number  
35 or through date of birth, full name and address. Cases with defined ICD-10 codes that have  
36 been validated for accuracy are identified from Hospital Episode Statistics (HES) for  
37 ascertainment purposes. HES consists of routinely recorded, administrative data describing  
38 each hospital admission in the NHS(15). As well as demographic information on the patient,  
39 the primary reason for admission and any co-morbidities are recorded using ICD-10 codes.  
40 Death certificate data from the Office for National Statistics (ONS) is provided to NCARDRS  
41 monthly for children born alive after 1<sup>st</sup> January 2018 and where a relevant ICD-10 coded  
42 condition (within a specified range) is listed as a cause of death. Information about babies that  
43 were born alive or stillborn after 24 weeks gestation (civilly registrable in England) is  
44 supplemented using birth registration information supplied by the ONS. Survival for all patients  
45 recorded is updated at least annually by linkage with the NHS Personal Demographics Service  
46  
47  
48  
49  
50  
51  
52  
53  
54  
55  
56  
57  
58  
59  
60

1  
2  
3 (PDS) on [NHS Spine](#), a collection of national databases that holds electronic records of  
4 important patient information and demographics.  
5  
6  
7  
8  
9

## 10 Data processing

11  
12  
13  
14  
15 Once received, identifiable patient data are processed by trained registration officers.  
16 Processing involves manual extraction of clinical information from clinical reports and letters  
17 or free text comments in clinical software systems. Registration officers require detailed  
18 knowledge of congenital anomalies, clinical coding and clinical pathways for the range of  
19 different conditions collected. As NCARDRS is a multisource register, patient identifiers are  
20 required to ensure that there is no duplication, and that incoming data is linked to the correct  
21 baby and pregnancy. Where cases are entered manually, patient identifiers are checked  
22 manually using the Summary Care Record on NHS Spine. Further information is requested  
23 from the relevant clinician or obtained by direct, manual interrogation of patient records by  
24 registration officers via secure remote access to a hospital's clinical software systems or  
25 clinical documents where this is available.  
26  
27  
28  
29  
30  
31  
32  
33  
34  
35  
36  
37

38 Data are input onto the data management system in two ways: 1) data on individual patients  
39 submitted by providers are assessed by trained registration officers and manually entered or  
40 2) data from electronic sources are loaded via a semi-automatic process known as the data  
41 waterfall (Figure 2). The data waterfall is a process which loads data from electronic sources.  
42 Its purpose is to perform basic validations on the data, confirm the patient's demographic  
43 information (via NHS Spine), match the patient to an existing patient (or create a new patient  
44 record) and create records, such as a screening or diagnostic test event which can be  
45 processed by registry staff. Most cases consist of information processed by both manual and  
46 automatic methods.  
47  
48  
49  
50  
51  
52  
53  
54  
55  
56  
57  
58  
59  
60

1  
2  
3 Anomalies are registered according to varying degrees of certainty depending on the clinical  
4 evidence available; confirmed, probable or suspected. Anomalies remain at the level of  
5 suspected until the evidence supporting the diagnosis of the anomaly attains agreed  
6 confirmation criteria. These criteria have been established with clinical input and consider  
7 the method by which the diagnosis is made, the specialism and confidence of the reporting  
8 clinician, the gestational or postnatal age at which the anomaly was identified, and the  
9 reliability of data sources. Criteria are different for each type of anomaly and a baby can  
10 have multiple anomalies, each with different statuses, depending on the level of evidence  
11 available for each one. Not all anomalies can be confirmed by the gold standard diagnostic  
12 test. Where there is a confident diagnosis by a relevant specialist in the field and the  
13 evidence is well described a probable confirmation status is used. Only data on probable  
14 and confirmed cases are used for routine reporting and analysis purposes and both are  
15 considered reportable.

## 31 Data structure

32  
33  
34  
35 Registration is framed at the level of the anomaly, baby, pregnancy and birth mother. The data  
36 are organised into over 600 raw tables which are in turn further organised into a series of  
37 approximately 100 custom-built analytical views, tables and lookup tables reflecting five main  
38 thematic groups, mother, pregnancy, baby, anomaly and test, with one-to-many relationships  
39 across all. Each table contains a primary key that uniquely identifies records within that table  
40 and allows joins between tables. A baby and a mother are each assigned a unique identifier.  
41  
42  
43  
44  
45  
46  
47  
48  
49  
50  
51  
52  
53  
54  
55  
56  
57  
58  
59  
60  
Registration records are never closed and new events can be added if new information is  
submitted.

## Key data fields

Detailed clinical and demographic information on the mother, baby, anomaly and pregnancy is recorded (Table 1). Multiple anomalies can be registered against a baby, each with different evidence and confirmation status.

NCARDRS works closely with the NHS Fetal Anomaly Screening Programme (FASP) to audit the detection of 15 conditions groups and these conditions are subject to enhanced registration. To facilitate this audit, more extensive information on antenatal screening and the nature and timing of diagnostic testing is collected for these conditions and other closely related or similar conditions. The conditions that are covered by this enhanced registration include severe cardiac anomalies, trisomy 13, trisomy 18 and trisomy 21, neural tube defects, lethal skeletal dysplasia, cleft lip+/palate, bilateral renal agenesis, abdominal wall anomalies and congenital diaphragmatic hernia (see Table S1 in the supplementary materials). These 15 condition groups reflected 35% (n=4501) of the 13,065 babies registered with a confirmed or probable congenital anomaly in 2020.

## Data Quality

Automatic and manual quality checks are embedded into the registration process at points of entry, at the level of the individual record and on the birth cohort as a whole prior to finalisation of the data for reporting. As well as internal data quality indicators (DQIs), the data are evaluated against DQIs for international bodies against known targets(16). For example, the prevalence of anencephaly is reported as an indicator of ascertainment of conditions detected at earlier gestations. Other DQIs focus on the accuracy of diagnosis, for example the number of babies with more than one anomaly, or the prevalence of selected codes that have used the BPA extension code in addition to the ICD-10 code.

## Patient and public involvement

Patient groups and third sector organisations representing patients were involved in the design of this register-based cohort and were members of an expert committee of stake holders made up of academics, clinicians, third sector organisation and patient interest groups that oversaw the formation of NCARDRS.

## Ethical approval and governance arrangements

NCARDRS has legal permission to collect patient-level data on those with a confirmed or suspected congenital anomaly or rare disease for specified purposes, without consent, to use it to protect the health of the population. Data are collected under legal instructions known as Directions, from the Secretary of State for Health and Social Care, made in accordance with section 254 of the Health and Social Care Act 2012 (2012 Act)(17). Strict technical and contractual controls are put in place to prevent unauthorized access and use of the data, with staff undergoing regular training on data protection and information governance.

## FINDINGS TO DATE

As of June 2023, NCARDRS held information on 117,682 mothers and 121,184 babies born in England since 2015. Table 2 shows the number of babies and other characteristics registered in regions with full congenital anomaly registration coverage by year of birth.

NCARDRS currently collects data on more than 1,000 different congenital anomalies, many of which are rare diseases, and provides expert analysis and interpretation of the data across a wide range of national and international functions. The data are available as a source of



1  
2  
3 intelligence for clinicians, public health, health-care performance, basic and applied research,  
4 patient groups, academics and commissioning and industry partners. A summary of the data  
5 is published each year describing congenital anomalies in England in the context of  
6 prevalence reported by anomaly group, timing of diagnosis and important public health  
7 indicators such as maternal age and infant mortality(10, 13, 18-21). In 2020, NCARDRS  
8 reported a total of 13,065 babies with one or more confirmed or probable congenital anomalies  
9 in 589,454 total births (live births and stillbirths), giving an overall birth prevalence of 221.7  
10 per 10,000 total births (95% confidence intervals (CI) 217.9 - 225.5) or 1 for every 45  
11 births(13). The rate of perinatal mortality associated with a congenital anomaly was highest  
12 for genetic disorders (3.1 per 10,000 total births, 95% CI 2.7-3.6), followed by congenital heart  
13 anomalies (2.8 per 10,000 total births, 95% CI 2.4-3.2). Infant mortality rate was highest for  
14 congenital heart anomalies (4.9 per 10,000 live births, 95% CI 4.4-5.5), followed by genetic  
15 conditions (3.0 per 10,000 live births, 95% CI 2.6-3.5). The rate of genetic conditions in babies  
16 born to women over 40 years old was almost 7 times higher relative to babies born to mothers  
17 under 20 years old (risk ratio equal to 6.9, 95% CI 5.2-9.2).

18  
19  
20  
21  
22  
23  
24  
25  
26  
27  
28  
29  
30  
31  
32  
33  
34  
35  
36  
37  
38  
39  
40  
41  
42  
43  
44  
45  
46  
47  
48  
49  
50  
51  
52  
53  
54  
55  
56  
57  
58  
59  
60  
Congenital anomaly registration data for England is submitted to international bodies to  
allowing pooling of data across a wider geographical area to support analysis into causes of  
these rare conditions and how to prevent them. Data is submitted annually to EUROCAT and  
to the International Clearinghouse for Birth Defects Surveillance and Research (ICBDSR).  
Surveillance is performed annually using internationally recognised tools to identify potential  
clusters of anomalies and changes in trends(22).

NCARDRS works closely with NHS Screening Programmes delivering service evaluation for  
antenatal and new-born screening services. NCARDRS audits the detection of the conditions  
included in the Fetal Anomaly Screening Programme (FASP) (see Table S1 in the  
supplementary materials) and, to enable this, these conditions are subject to enhanced  
registration and active ascertainment. By linking information at patient level, NCARDRS  
creates a longitudinal record of the screening and diagnostic pathway for each mother, fetus,

1  
2  
3 or baby, enabling analysis of the efficacy of the tests, the behavioural choices on the pathway,  
4 and the operational standards of the service. NCARDRS have recently published the first  
5 national study of fetal anomaly ultrasound scan detection rates in England (23). The data is  
6 used to provide reliable information about the quality of screening services at local, regional  
7 and national level and contributes towards the safety and effectiveness of screening services.  
8 Each screening provider receives a report detailing hospital-level detection rates and also  
9 individual case-level detection status to allow further clinical audit and identify training  
10 requirements. NCARDRS is supporting the NHS evaluative roll-out of non-invasive prenatal  
11 testing (NIPT) for Edwards' syndrome, Patau's syndrome, and Down's syndrome in  
12 England(24). Routine laboratory surveillance is conducted on a monthly, quarterly and annual  
13 level, and test performance will be evaluated by linking laboratory and registration data.

14  
15  
16  
17  
18  
19  
20  
21  
22  
23  
24  
25  
26  
27  
28  
29  
30  
31  
32  
33  
34  
35  
36  
37  
38  
39  
40  
41  
42  
43  
44  
45  
46  
47  
48  
49  
50  
51  
52  
53  
54  
55  
56  
57  
58  
59  
60

At the start of the COVID-19 pandemic, NCARDRS informed the production of the Shielded Patient List (SPL)(25) by identifying individuals living with congenital anomalies and selected rare diseases that may have been at increased risk from COVID-19 infection and NCARDRS will support the continued evaluation of vaccines against COVID-19 in pregnancy(26).

Many publications use datasets that predate NCARDRS including the legacy regional registers. NCARDRS data has been used to examine the epidemiology of congenital anomalies across Europe including Dandy-Walker syndrome(27), VACTERL association (28, 29) , neural tube defects (30), aplasia cutis(31) achondroplasia(32) and vascular disruption anomalies(33). Studies aim to improve outcomes of babies with a congenital anomaly and to inform policy so that some may be prevented, for example to justify the fortification of flour with folic acid. Recently, the UK government announced plans for the fortification of flour with folic acid to reduce neural tube defects(34). NCARDRS will support the evaluation and monitoring of the impact of implementation of this policy(35).

## STRENGTHS AND LIMITATIONS:

## National Coverage

The key strength of the NCARDRS data set is its national coverage across a large birth population. NCARDRS is the largest register in Europe(36) in both size of population and representativeness. With complete population coverage of pregnancies from 2018 onwards, the data are representative and comprehensive, capitalising on the centralised nature of English health care. Registration records are never closed, and data can continue to passively accumulate, enriching each record and facilitating the potential identification of future syndromes or providing more information on the phenotypic manifestations of genetic differences identified later in life.

## Multisource ascertainment

An NCARDRS congenital anomaly record can be made up of multiple difference sources, some automatically added and manually verified. Clinical information, often obtained by the treating clinician, is combined with cytogenetic laboratory data, data from routinely collected hospital activity and national statistics, and extracts from clinical systems to make a cohesive and comprehensive record detailing the phenotype. A registration record is never closed, allowing for the possibility of adding further genomic data as it becomes available with the wider use of whole genome sequencing.

## Standardised disease coding and data entry

The development of NCARDRS has demonstrated that it is possible to conduct national registration on a large population using standardised approaches to data collection and management, disease coding, data classification, analysis and reporting. Data are coded consistently across the country and regions can be compared, allowing the identification of

1  
2  
3 clusters and geographical disparities which may be a result of population demographics, social  
4  
5 determinants of health or local exposure.  
6  
7

## 8 **Ascertainment**

9

10  
11  
12 National prevalence in England for 2018-2020 is consistent with European surveillance data  
13  
14 for the same time period (excluding data for England) across most major congenital anomaly  
15  
16 groups (Figure 3). The prevalence of severe anomalies, such as severe congenital heart,  
17  
18 abdominal wall, oro-facial cleft, respiratory and genetic conditions was higher than the  
19  
20 European average. These anomaly subgroups include FASP-conditions and so are subject to  
21  
22 enhanced registration. Their higher prevalence reflects the integration of clinical audit in  
23  
24 NCARDRS and demonstrates the impact of clinical engagement on data quality and  
25  
26 ascertainment. The England national prevalence estimates for all cardiac conditions, limb  
27  
28 anomalies and congenital anomalies of the kidney and urinary tract (CAKUT) conditions are  
29  
30 lower than the average for other European registers. This likely reflects some under-  
31  
32 ascertainment of anomalies that are predominantly confirmed postnatally in regions of  
33  
34 NCARDRS new to reporting(10).  
35  
36

37  
38 Within England, there is some variation in the prevalence of different anomaly groups  
39  
40 depending on the length of time registration has been established, reflecting developing  
41  
42 ascertainment in regions new to congenital anomaly registration particularly for anomalies that  
43  
44 are more frequently identified postnatally or for those anomalies that are less severe(10, 21).  
45  
46 As registration becomes embedded and ascertainment increases, differences in prevalence  
47  
48 because of data collection should dissipate, revealing true regional differences, if they exist.  
49  
50

## 51 **Risk factor information**

52  
53

54  
55  
56 Information on the demographics of the mother is collected for each pregnancy and include  
57  
58 ethnicity, Body Mass Index, illnesses or medications, folic acid intake and other lifestyle factors  
59  
60

1  
2  
3 such as smoking. This information can be supplemented using data linkage to examine other  
4 factors, including social deprivation measured at the area-level through deprivation scores for  
5 mother's residential address at delivery,  
6  
7  
8  
9

## 10 Timeliness of data collection

11  
12  
13

14 Babies with a congenital anomaly are first registered by NCARDRS approximately 12 months  
15 after their expected date of delivery. This time lag allows for the notification of outcome of the  
16 pregnancy and a confirmatory diagnosis after delivery along with the notification of other  
17 relevant postnatal information and follow-up if required. Finalised delivery year cohorts are  
18 available approximately 18 months to two years following the end of a delivery year e.g.,  
19 babies delivered in 2021 would be reported on in early 2024. Recent advances in the  
20 automated processing of defined data feeds (e.g. fetal medicine software system extracts) aim  
21 to improve the timeliness of data by reducing the time lag.  
22  
23  
24  
25  
26  
27  
28  
29  
30  
31  
32  
33

## 34 FUTURE WORK

35  
36  
37

38 Planned improvements to the timeliness of data reporting and continued improvement to  
39 developing ascertainment for new regions and completeness of fields will further improve data  
40 quality. Proximity to the more established cancer registration service allows the register to  
41 build on synergies in data management, analytical infrastructure and data liaison.  
42  
43  
44  
45  
46

47 As the service matures, new data sources will be added to improve data quality or  
48 ascertainment. Transition to NHS England has situated NCARDRS closer to clinical providers  
49 and commissioning services which should improve data access and facilitate linkage to a  
50 wider network of data. Linkage with the Maternity Services Dataset, a routinely-collected  
51 national dataset describing maternity care in England(37), is underway and this aims to  
52 improve the completion of risk factor data items such as smoking, alcohol use as well as  
53 providing access to further information about the pregnancy. The inclusion of primary care  
54  
55  
56  
57  
58  
59  
60

1  
2  
3 data would be an obvious improvement to the ascertainment of postnatally-diagnosed  
4 conditions as would clinical audit data such as paediatric intensive care (PICANET), cardiac  
5 surgery (NICOR), maternal and neonatal deaths (MBRACE) and NHS England commissioned  
6 Highly Specialised Services data.  
7  
8  
9

10  
11  
12 Linkage to other datasets provides vital information on survival and health outcomes for these  
13 children throughout their life course. Cancer registration data collected by NDRS has been  
14 linked to the community prescriptions dataset(38) and linkage with the congenital anomaly  
15 registration data is in progress. This could provide information on possible drug interactions  
16 and potential teratogens. Linkage to other disease registers, subject to adequate consenting  
17 materials and approvals, is possible and could provide valuable information on health  
18 outcomes for children with congenital anomalies. NCARDRS currently contains data that only  
19 relates to the health outcomes of the child and further work should also include linkage to  
20 social and educational data.  
21  
22  
23  
24  
25  
26  
27  
28  
29  
30  
31  
32  
33  
34  
35

## 36 CONCLUSIONS

37  
38  
39  
40 If the thalidomide scandal of the 1960s prompted the establishment of congenital anomaly  
41 registration to understand the causes of congenital anomalies, the COVID-19 pandemic  
42 amplified the need to be able to identify and protect individuals living with conditions that may  
43 put them at increased risk compared to the general population. NCARDRS' congenital  
44 anomaly register collates information across the full patient pathway as the pregnancy  
45 progresses and the child grows. The value of this dataset in supporting clinical audits and  
46 evaluating service delivery is proven. This population-based national register – currently the  
47 largest data collection of its kind globally – has a critical role in supporting the epidemiology  
48 and monitoring of disease trends, investigating the causes of these conditions, evaluating the  
49  
50  
51  
52  
53  
54  
55  
56  
57  
58  
59  
60

1  
2  
3 outcome and providing this crucial information to parents, patients and clinicians and to clinical  
4  
5 and service commissioners so these children have what they need as they grow.  
6  
7  
8  
9

## 10 ACKNOWLEDGEMENTS

11  
12  
13  
14  
15 Thanks to the registration teams and associated functions in NDRS who register the data and  
16  
17 the notifiers across the NHS and other healthcare organisations who send NDRS data. This  
18  
19 work uses data that has been provided by patients, the NHS and other health care  
20  
21 organisations as part of patient care and support. The data are collated, maintained and quality  
22  
23 assured by the National Disease Registration Service, which is part of NHS England.  
24  
25

### 26 **Details of contributions**

27  
28 JMB led the drafting of the manuscript with advice from KMF, JB and SS as to the concept,  
29  
30 structure and content. Additional sections were drafted by BW, DG, CJ, SyS, NA and KR. BW  
31  
32 drafted the supplementary table (Table S1). KR, CJ, BW, DG, SyS provided advice on  
33  
34 registration and/or data management system practice. Data analysis was performed by JMB,  
35  
36 DM, GM and EO. All authors reviewed and commented on the manuscript and gave approval  
37  
38 for publication.  
39  
40  
41  
42  
43  
44

### 45 **Competing interests statement**

46  
47 No conflicts of interest have been declared.  
48  
49  
50  
51

### 52 **Funding**

53  
54 The authors report no direct funding for this work. The congenital anomaly register is curated  
55  
56 by NDRS on behalf of NHS England.  
57  
58  
59  
60

### Data availability statement

Permission to access congenital anomaly registration data can be granted to individuals who demonstrate that either there is a justified purpose for the data release, that there is an appropriate legal basis with safeguards in place to protect the data, or the data release is deemed to be anonymous (e.g. aggregate data). The access process for NDRS data is managed by Data Access Request Service (DARS) (<https://digital.nhs.uk/services/data-access-request-service-dars>) in NHS England. Full details, including data dictionaries, are available. Further details on the process of data access and associated costs are available on the DARS website [<https://digital.nhs.uk/services/data-access-request-service-dars>]. Data can also be made available by working in partnership with National Disease Registration Service and enquiries can be directed to [ndrs.enquiries@nhs.net](mailto:ndrs.enquiries@nhs.net).

### Collaboration statement

NDRS supports collaborations with academic and other institutions to use the data for a justified purpose. Enquiries, requests for statistical code used and anonymised data should be directed to [ndrs.enquiries@nhs.net](mailto:ndrs.enquiries@nhs.net).

## REFERENCES

1. Boyle B, Addor MC, Arriola L, Barisic I, Bianchi F, Csaky-Szunyogh M, et al. Estimating Global Burden of Disease due to congenital anomaly: an analysis of European data. Archives of disease in childhood Fetal and neonatal edition. 2018;103(1):F22-F8.
2. ONS. Child and infant mortality in England and Wales: 2020. Office for National Statistics; 2022.
3. World Health Organisation. Congenital disorders 2023 [Available from: [https://www.who.int/health-topics/congenital-anomalies#tab=tab\\_3](https://www.who.int/health-topics/congenital-anomalies#tab=tab_3)]
4. Dolk H. EUROCAT: 25 years of European surveillance of congenital anomalies. Archives of disease in childhood Fetal and neonatal edition. 2005;90(5):F355-8.



5. Henson KE, Elliss-Brookes L, Coupland VH, Payne E, Vernon S, Rous B, et al. Data Resource Profile: National Cancer Registration Dataset in England. *Int J Epidemiol.* 2020;49(1):16-h.
6. Department for Health. The UK Strategy for Rare diseases In: Health UDo, editor. 2013.
7. CMO. Annual Report of the Chief Medical Officer 2011: On the State of the Public's Health 2011.
8. Stevens S, Miller N, Rashbass J. Development and progress of the National Congenital Anomaly and Rare Disease Registration Service. *Arch Dis Child.* 2018;103(3):215-7.
9. Boyd P, Armstrong B, H D, Botting B, Pattenden S, Abramsky L, et al. Congenital anomaly surveillance in England—ascertainment deficiencies in the national system. *British Medical Journal.* 2004;330:27
10. NCARDRS. National Congenital Anomaly and Rare Disease Registration Service Congenital Anomaly Statistics Report 2018. UK Government: Public Health England; 2020. Report No.: PHE publications gateway number: GW-1445.
11. EUROCAT. EUROCAT Guide 1.4: Instruction for the registration of congenital anomalies. University of Ulster; 2013 Last update version 15/11/2019.
12. EUROCAT. [https://eu-rd-platform.jrc.ec.europa.eu/eurocat/eurocat-data/prevalence\\_en](https://eu-rd-platform.jrc.ec.europa.eu/eurocat/eurocat-data/prevalence_en) 2021 [
13. NCARDRS. National Congenital Anomaly and Rare Disease Registration Service Congenital Anomaly Statistics Report 2020. NHS Digital; 2022.
14. World Health Organization. ICD-10: International Statistical Classification of Diseases and Related Health Problems. Geneva: World Health Organization; 2010.
15. Herbert A, Wijlaars L, Zylbersztejn A, Cromwell D, Hardelid P. Data Resource Profile: Hospital Episode Statistics Admitted Patient Care (HES APC). *Int J Epidemiol.* 2017;46(4):1093-i.
16. Loane M, Dolk H, Garne E, Greenlees R, Group aEW. EUROCAT Data Quality Indicators for Population-Based Registries for Congenital Anomalies. *Birth Defects Research.* 2011;91:S23-S30.
17. DHSC. National Disease Registries Directions 2021. In: Care DoHS, editor. London, UK2021.
18. NCARDRS. National Congenital Anomaly and Rare Disease Registration Service Congenital Anomaly Statistics Report 2015. UK Government: Public Health England; 2017. Report No.: PHE publications gateway number: GW-1445.
19. NCARDRS. National Congenital Anomaly and Rare Disease Registration Service Congenital Anomaly Statistics Report 2016. UK Government: Public Health England; 2018. Report No.: PHE publications gateway number: GW-1445.
20. NCARDRS. National Congenital Anomaly and Rare Disease Registration Service Congenital Anomaly Statistics Report 2017. UK Government: Public Health England; 2019. Report No.: PHE publications gateway number: GW-1445.
21. NCARDRS. National Congenital Anomaly and Rare Disease Registration Service Congenital Anomaly Statistics Report 2019. UK Government: Public Health England; 2021. Report No.: PHE publications gateway number: GOV-9201.
22. Loane M, Dolk H, Kelly A, Teljeur C, Greenlees R, Densem J, et al. Paper 4: EUROCAT statistical monitoring: identification and investigation of ten year trends of congenital anomalies in Europe. *Birth defects research Part A, Clinical and molecular teratology.* 2011;91 Suppl 1:S31-43.
23. Aldridge N, Pandya P, Rankin J, Miller N, Broughan J, Permilloo N, et al. Detection rates of a national fetal anomaly screening programme: A national cohort study. *BJOG.* 2022.
24. Public Health England. Screening for Down's syndrome, Edwards' syndrome and Patau's syndrome: NIPT 2021.
25. NHS Digital. Shielded Patient List 2020 [Available from: <https://digital.nhs.uk/coronavirus/shielded-patient-list>.
26. Immunisation and Vaccine-Preventable Diseases Division. Protocol for the national surveillance and safety analysis of coronavirus (COVID-19) vaccination in pregnancy. Published 25 November 2021: UK Health Security Agency; 2021.

- 1  
2  
3 27. Santoro M, Coi A, Barisic I, Garne E, Addor MC, Bergman JEH, et al. Epidemiology of Dandy-  
4 Walker Malformation in Europe: A EUROCAT Population-Based Registry Study. *Neuroepidemiology*.  
5 2019;53(3-4):169-79.  
6  
7 28. van de Putte R, van Rooij I, Haanappel CP, Marcelis CLM, Brunner HG, Addor MC, et al.  
8 Maternal risk factors for the VACTERL association: A EUROCAT case-control study. *Birth Defects Res*.  
9 2020;112(9):688-98.  
10 29. van de Putte R, van Rooij I, Marcelis CLM, Guo M, Brunner HG, Addor MC, et al. Spectrum of  
11 congenital anomalies among VACTERL cases: a EUROCAT population-based study. *Pediatr Res*.  
12 2020;87(3):541-9.  
13 30. Morris JK, Addor MC, Ballardini E, Barisic I, Barrachina-Bonet L, Braz P, et al. Prevention of  
14 Neural Tube Defects in Europe: A Public Health Failure. *Front Pediatr*. 2021;9:647038.  
15 31. Coi A, Barisic I, Garne E, Pierini A, Addor MC, Aizpurua Atxega A, et al. Epidemiology of  
16 aplasia cutis congenita: A population-based study in Europe. *J Eur Acad Dermatol Venereol*.  
17 2023;37(3):581-9.  
18 32. Coi A, Santoro M, Garne E, Pierini A, Addor MC, Alessandri JL, et al. Epidemiology of  
19 achondroplasia: A population-based study in Europe. *Am J Med Genet A*. 2019;179(9):1791-8.  
20 33. Morris JK, Wellesley D, Limb E, Bergman JEH, Kinsner-Ovaskainen A, Addor MC, et al.  
21 Prevalence of vascular disruption anomalies and association with young maternal age: A EUROCAT  
22 study to compare the United Kingdom with other European countries. *Birth Defects Res*.  
23 2022;114(20):1417-26.  
24 34. Folic acid added to flour to prevent spinal conditions in babies. [press release]. 20  
25 September 2021 2021.  
26 35. Broughan J, Martin D, Higgins T, Swan G, Cullum A, Kurinczuk J, et al. Prevalence of neural  
27 tube defects in England prior to the mandatory fortification of non-wholemeal wheat flour with folic  
28 acid: a population-based cohort study. *Archives of Disease in Childhood*. 2023.  
29 36. EUROCAT. Coverage of the European live births, Birth year 2015, by EUROCAT full or  
30 associate member registries (January 2020). 2020.  
31 37. MSDS. Maternity Services Dataset [https://digital.nhs.uk/data-and-information/data-](https://digital.nhs.uk/data-and-information/data-collections-and-data-sets/data-sets/maternity-services-data-set)  
32 [collections-and-data-sets/data-sets/maternity-services-data-set](https://digital.nhs.uk/data-and-information/data-collections-and-data-sets/data-sets/maternity-services-data-set).  
33  
34 38. Henson KE, Brock R, Shand B, Coupland VH, Elliss-Brookes L, Lyratzopoulos G, et al. Cohort  
35 profile: prescriptions dispensed in the community linked to the national cancer registry in England.  
36 *BMJ open*. 2018;8(7):e020980.  
37  
38  
39  
40  
41  
42  
43  
44  
45  
46  
47  
48  
49  
50  
51  
52  
53  
54  
55  
56  
57  
58  
59  
60

1  
2  
3 Figure 1 The regional structure of NCARDRS and the proportion of the birth population of  
4 England that was covered by congenital anomaly registration.  
5  
6  
7

8 Figure 2 : Schematic describing the multisource registration process used for congenital  
9 anomalies in England.  
10  
11  
12

13 Figure 3 The prevalence of anomaly groups in England compared to EUROCAT registers  
14 excluding English registers (2018-2020) [data downloaded 24<sup>th</sup> April 2023 from EUROCAT,  
15  
16  
17  
18  
19  
20  
21  
22  
23  
24  
25  
26  
27  
28  
29  
30  
31  
32  
33  
34  
35  
36  
37  
38  
39  
40  
41  
42  
43  
44  
45  
46  
47  
48  
49  
50  
51  
52  
53  
54  
55  
56  
57  
58  
59  
60  
1<sup>st</sup> August 2022 NCARDRS]

peer review only

Table 1: Summary of key data items currently available for each congenital anomaly registration in the NCARDRS congenital anomaly dataset. Data are available for all years.

| <b>Mother</b>                   | <b>Pregnancy</b>                                             | <b>Baby</b>                              | <b>Anomaly</b>                                | <b>Test<sup>[1] [3]</sup></b> |
|---------------------------------|--------------------------------------------------------------|------------------------------------------|-----------------------------------------------|-------------------------------|
| Patient identifier              | Pregnancy identifier                                         | Patient identifier                       | Anomaly identifier                            | Test date                     |
| NHS number                      | Expected Delivery Date                                       | NHS number                               | Confirmation Status of anomaly <sup>[2]</sup> | Test type                     |
| Date of birth                   | Pregnancy outcome                                            | Sex                                      | ICD 10 & BPA extension code                   | Test result(s)                |
| Ethnicity                       | Delivery information                                         | Date of birth                            | Description of the anomaly                    | Test provider                 |
| Country of birth                | Screening details <sup>[3]</sup>                             | Gestational length at delivery           | Gestation first suspected                     | Test requestor                |
| Vital status                    | Body Mass Index                                              | Birth weight (g)                         | Gestation at confirmation                     | Ultrasound markers            |
| Previous births and pregnancies | Smoking status at booking, alcohol and substance use         | Birth order if from a multiple pregnancy | Diagnostic method                             | Indication                    |
|                                 | Maternal illness status                                      | Method of delivery                       | Aetiology of the anomaly/ies                  |                               |
|                                 | Folic acid intake                                            | Surgical status                          |                                               |                               |
|                                 | Assisted conception status                                   | Date of death                            |                                               |                               |
|                                 | Number of fetuses                                            | Postmortem status                        |                                               |                               |
|                                 | Consanguinity                                                |                                          |                                               |                               |
|                                 | Deprivation (derived from postcode of residence at delivery) |                                          |                                               |                               |
|                                 | Postcode at booking and at delivery                          |                                          |                                               |                               |

[1] Test information is only consistently registered for conditions with enhanced registration (ie those conditions within the FASP audit)

[2] Confirmation status: Anomalies are registered according to varying degrees of certainty depending on the clinical evidence available (*confirmed, probable or suspected*). Anomalies remain at the level of *suspected* until the evidence supporting the diagnosis of the anomaly attains agreed confirmation criteria

[3] Some fields may require additional Research Ethics Committee or other approvals on request

Table 2 The number of pregnancies, babies and anomalies recorded registered since NCARDRS has been in operation until 2020 Data extracted 13th June 2023.

|                                                                                                      | <b>2015</b> | <b>2016</b> | <b>2017</b> | <b>2018</b> | <b>2019</b> | <b>2020</b> |
|------------------------------------------------------------------------------------------------------|-------------|-------------|-------------|-------------|-------------|-------------|
| Number of regions reporting                                                                          | 4           | 7           | 7           | 10          | 10          | 10          |
| Number of pregnancies with babies with a congenital anomaly of any status                            | 2,915       | 9,524       | 9,882       | 20,036      | 19,636      | 18,440      |
| Number of babies with a congenital anomaly of any status                                             | 2,932       | 9,574       | 9,937       | 20,145      | 19,767      | 18,541      |
| Number of mothers                                                                                    | 2,908       | 9,506       | 9,868       | 20,007      | 19,611      | 18,416      |
| Total number of anomalies                                                                            | 5,902       | 18,839      | 18,803      | 35,483      | 34,500      | 33,344      |
| Total number of confirmed and probable anomalies                                                     | 5,432       | 15,819      | 15,316      | 28,282      | 25,988      | 25,617      |
| Number of live and still births in regions with active congenital anomaly registration (denominator) | 141,474     | 329,301     | 320,013     | 628,171     | 614,952     | 589,454     |

NOTE : the numbers may differ from published estimates at point of reporting because of continued accumulation of data

Birth population calculated using ONS row level birth information available via the UKHSA DataLake.

1  
2  
3  
4  
5  
6  
7  
8  
9  
10  
11  
12  
13  
14  
15  
16  
17  
18  
19  
20  
21  
22  
23  
24  
25  
26  
27  
28  
29  
30  
31  
32  
33  
34  
35  
36  
37  
38  
39  
40  
41  
42  
43  
44  
45  
46  
47  
48  
49  
50  
51  
52  
53  
54  
55  
56  
57  
58  
59  
60

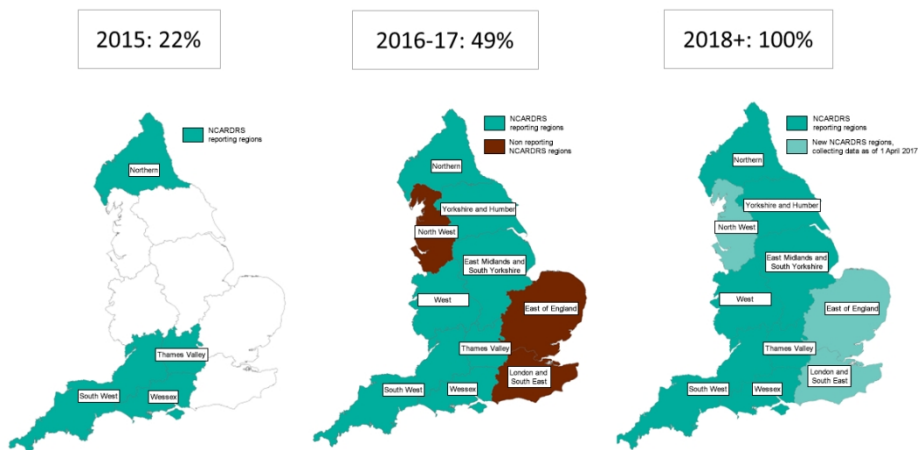

Figure 1 The regional structure of NCARDRS and the proportion of the birth population of England that was covered by congenital anomaly registration.

855x481mm (38 x 38 DPI)

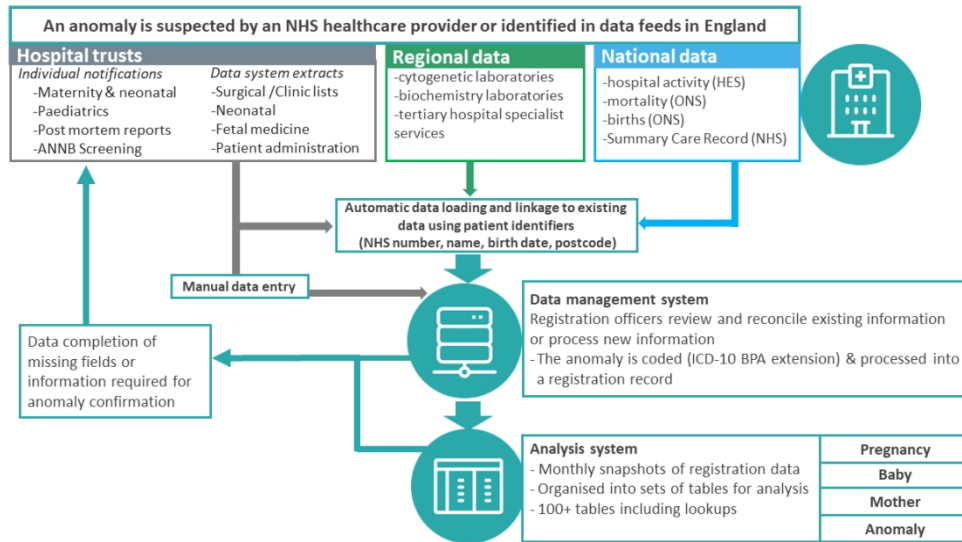

Figure 2 : Schematic describing the multisource registration process used for congenital anomalies in England.

855x481mm (38 x 38 DPI)

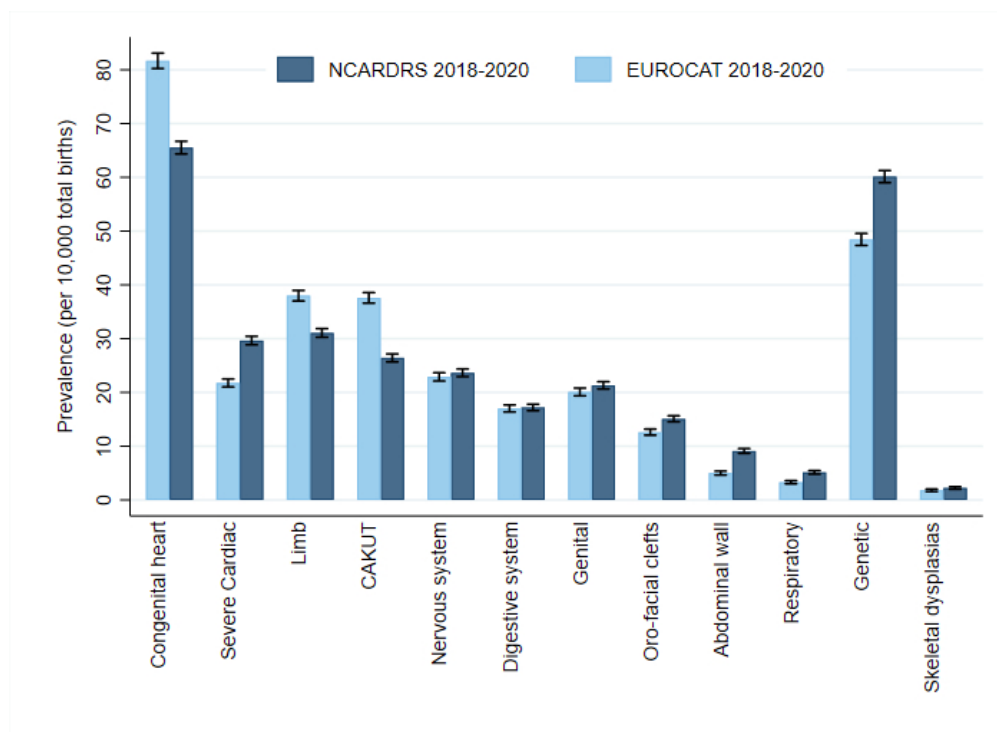

Figure 3 The prevalence of anomaly groups in England compared to EUROCAT registers excluding English registers (2018-2020) [data downloaded 24th April 2023 from EUROCAT, 1st August 2022 NCARDS]

466x338mm (38 x 38 DPI)



**Table S1** NCARDS inclusion and exclusion criteria for registerable congenital anomalies

| Anomaly type*            | Routine inclusion (per ICD-10 code blocks)                | Inclusions subject to criteria                                                                                                                                                                                               | Exclusions                                                                                                                                                                                                                                                                                         | Differences with EUROCAT                                                                                                                                                            | Enhanced registration                                                                        |
|--------------------------|-----------------------------------------------------------|------------------------------------------------------------------------------------------------------------------------------------------------------------------------------------------------------------------------------|----------------------------------------------------------------------------------------------------------------------------------------------------------------------------------------------------------------------------------------------------------------------------------------------------|-------------------------------------------------------------------------------------------------------------------------------------------------------------------------------------|----------------------------------------------------------------------------------------------|
| Nervous system anomalies | Q00-Q07<br>Congenital malformations of the nervous system | MEASUREMENT / SEVERITY<br>Q02 Microcephaly<br>Q03.8 (part) Congenital ventriculomegaly [of lateral ventricle(s)]<br>Q04.32 Reduction anomalies of cerebellum<br><br>CLINICAL SIGNIFICANCE<br>Q04.61 (part)<br>Arachnoid cyst | EXCLUDE IN ISOLATION<br>Q0780 Jaw-winking syndrome<br>Q0782 Crocodile tears<br><br>EXCLUDE always<br>Q04.6 (part) Porencephaly                                                                                                                                                                     | Q04.6 (part) Porencephaly - EUROCAT inclusion but NCARDS excludes<br><br>Q04.61 Single congenital cerebral cyst - EUROCAT exclusion in isolation but NCARDS includes Arachnoid cyst | YES<br>Q00* Anencephaly and similar malformations<br>Q01* Encephalocele<br>Q05* Spina bifida |
| Eye anomalies            | Q10-Q15<br>Congenital malformations of eye                | NA                                                                                                                                                                                                                           | EXCLUDE IN ISOLATION<br>Q10.1 Congenital ectropion,<br>Q10.2 Congenital entropion,<br>Q10.3 Other congenital malformations of eyelid, Q10.5 Congenital stenosis or stricture of lacrimal duct<br>Q13.2 (part) Anisocoria, congenital, Q13.5 Blue sclera<br>Minor anomalies and dysmorphic features | NA                                                                                                                                                                                  | NO                                                                                           |

1  
2  
3  
4  
5  
6  
7  
8  
9  
10  
11  
12  
13  
14  
15  
16  
17  
18  
19  
20  
21  
22  
23  
24  
25  
26  
27  
28  
29  
30  
31  
32  
33  
34  
35  
36  
37  
38  
39  
40  
41  
42  
43  
44  
45  
46

| Anomaly type*                | Routine inclusion (per ICD-10 code blocks)                        | Inclusions subject to criteria                 | Exclusions                                                                                                                                                                                                                                                                                          | Differences with EUROCAT | Enhanced registration |
|------------------------------|-------------------------------------------------------------------|------------------------------------------------|-----------------------------------------------------------------------------------------------------------------------------------------------------------------------------------------------------------------------------------------------------------------------------------------------------|--------------------------|-----------------------|
| Ear, face and neck anomalies | Q16 Congenital malformations of ear causing impairment of hearing | CLINICAL SIGNIFICANCE<br>Q18.3 Webbing of neck | EXCLUDE IN ISOLATION<br>Q17* Other congenital malformations of ear Q18.0-Q18.2<br>Branchial cleft malformations, Q18.4-Q18.9 Macrostomia, Microstomia, Macrocheilia, Microcheilia, Other congenital malformations of face and neck, Dysmorphic features NOS Minor anomalies and dysmorphic features | NA                       | NO                    |

For peer review only

| Anomaly type*                          | Routine inclusion (per ICD-10 code blocks)                | Inclusions subject to criteria                                                                                                                                                                                                                                                                                                                                                                              | Exclusions                                                                                                                                                                                                                                                                                                                                          | Differences with EUROCAT | Enhanced registration                                                                                                                                                                                                                                                                                                                                                                                                                                                                                                                                                                                                                                                                                                                                                    |
|----------------------------------------|-----------------------------------------------------------|-------------------------------------------------------------------------------------------------------------------------------------------------------------------------------------------------------------------------------------------------------------------------------------------------------------------------------------------------------------------------------------------------------------|-----------------------------------------------------------------------------------------------------------------------------------------------------------------------------------------------------------------------------------------------------------------------------------------------------------------------------------------------------|--------------------------|--------------------------------------------------------------------------------------------------------------------------------------------------------------------------------------------------------------------------------------------------------------------------------------------------------------------------------------------------------------------------------------------------------------------------------------------------------------------------------------------------------------------------------------------------------------------------------------------------------------------------------------------------------------------------------------------------------------------------------------------------------------------------|
| Heart and circulatory system anomalies | Q20-Q28<br>Congenital malformations of circulatory system | <p>PERSISTENCE</p> <p>Q21.10 Ostium secundum atrial septal defect (type II)</p> <p>CLINICAL SIGNIFICANCE</p> <p>Q24.8 Other specified congenital malformations of heart</p> <p>Q28.8 Other specified congenital malformations of circulatory system</p> <p>GESTATIONAL AGE AT DELIVERY &amp; PERSISTENCE / SURGERY / SEVERITY</p> <p>Q25.0 Patent ductus arteriosus, Q25.6 Stenosis of pulmonary artery</p> | <p>EXCLUDE IN ISOLATION</p> <p>Q21.11 Patent foramen ovale</p> <p>Q24.6 Congenital heart block</p> <p>Q25.41 Persistent right aortic arch</p> <p>Q26.1 Persistent left superior vena cava,</p> <p>Q26.8 (part) Absence of superior vena cava, Interrupted inferior vena cava</p> <p>Q27.0 Congenital absence and hypoplasia of umbilical artery</p> | NA                       | <p>YES</p> <p>SERIOUS CARDIAC ANOMALIES</p> <p>Q20.0 Common arterial trunk</p> <p>Q20.1 Double outlet right ventricle</p> <p>Q20.3 Transposition of the great arteries</p> <p>Q20.4 Double inlet ventricle</p> <p>Q21.2* Atrioventricular septal defect</p> <p>Q21.3, Q21.82 Tetralogy of Fallot</p> <p>Q22.0 Pulmonary valve atresia</p> <p>Q22.4 Congenital tricuspid stenosis</p> <p>Q22.5 Ebstein's anomaly</p> <p>Q22.6 Hypoplastic right heart syndrome</p> <p>Q23.0 Congenital stenosis of aortic valve</p> <p>Q23.2, Q23.3 Congenital mitral stenosis and insufficiency</p> <p>Q23.4 Hypoplastic left heart</p> <p>Q25.1* Coarctation of aorta</p> <p>Q25.2 Aortic atresia, interrupted aortic arch</p> <p>Q26.2 Total anomalous pulmonary venous connection</p> |

1  
2  
3  
4  
5  
6  
7  
8  
9  
10  
11  
12  
13  
14  
15  
16  
17  
18  
19  
20  
21  
22  
23  
24  
25  
26  
27  
28  
29  
30  
31  
32  
33  
34  
35  
36  
37  
38  
39  
40  
41  
42  
43  
44  
45  
46

| Anomaly type*                | Routine inclusion (per ICD-10 code blocks)                            | Inclusions subject to criteria                                                                                               | Exclusions                                                                                                                                                                                            | Differences with EUROCAT | Enhanced registration                                 |
|------------------------------|-----------------------------------------------------------------------|------------------------------------------------------------------------------------------------------------------------------|-------------------------------------------------------------------------------------------------------------------------------------------------------------------------------------------------------|--------------------------|-------------------------------------------------------|
| Respiratory system anomalies | Q30-Q34<br>Congenital malformations of respiratory system             | CLINICAL SIGNIFICANCE<br>Q30.8 Other congenital malformations of nose<br><br>CAUSE<br>Q33.6 Hypoplasia and dysplasia of lung | EXCLUDE IN ISOLATION<br>Q31.5 Congenital laryngomalacia<br>Q32.0 Congenital tracheomalacia<br>Q32.2* Congenital bronchomalacia<br>Q33.00 Congenital single lung cyst<br>Q33.1* Accessory lobe of lung | NA                       | NO                                                    |
| Orofacial clefts             | Q35-Q37 Cleft lip and cleft palate                                    | MINOR FORMS<br>Q35-Q37 Cleft lip and cleft palate                                                                            | EXCLUDE IN ISOLATION<br>Q35.7 Cleft uvula                                                                                                                                                             | NA                       | YES<br>Q36*, Q37* Cleft lip with/without cleft palate |
| Abdominal wall               | Q79.2 Exomphalos<br>Q79.3<br>Gastroschisis<br>Q79.5 Body Wall complex |                                                                                                                              |                                                                                                                                                                                                       | NA                       | YES<br>Q79.2 Exomphalos<br>Q79.3 Gastroschisis        |

| Anomaly type*              | Routine inclusion (per ICD-10 code blocks)                                                             | Inclusions subject to criteria                                                                                                                                                                                                                                             | Exclusions                                                                                                                                                                                                                                                                                                                                                                                                                                                                                                            | Differences with EUROCAT | Enhanced registration                         |
|----------------------------|--------------------------------------------------------------------------------------------------------|----------------------------------------------------------------------------------------------------------------------------------------------------------------------------------------------------------------------------------------------------------------------------|-----------------------------------------------------------------------------------------------------------------------------------------------------------------------------------------------------------------------------------------------------------------------------------------------------------------------------------------------------------------------------------------------------------------------------------------------------------------------------------------------------------------------|--------------------------|-----------------------------------------------|
| Gastrointestinal anomalies | Q38-Q45 Other congenital malformations of the digestive system; Q79.0* Congenital diaphragmatic hernia | <p>CLINICAL SIGNIFICANCE</p> <p>Q38.3 Other congenital malformations of tongue</p> <p>Q44.5 Other congenital malformations of bile ducts</p> <p>GESTATIONAL AGE AT DIAGNOSIS &amp; SURGERY</p> <p>Q43.30 Malrotation of colon</p> <p>SURGERY</p> <p>Q43.5 Ectopic anus</p> | <p>EXCLUDE IN ISOLATION</p> <p>Q38.1 Ankyloglossia, Q38.2 Macroglossia, Q38.3 (part) Microglossia, Q38.4 (part) Congenital ranula, Q38.50 High arched palate</p> <p>Q40.0 Congenital hypertrophic pyloric stenosis, Q40.1 Congenital hiatus hernia, Q40.21 Dysmotility of stomach</p> <p>Q43.0* Meckel's diverticulum, Q43.20 Large intestinal dysmotility, Q43.81 Small intestinal dysmotility, Q43.82 Generalised intestinal dysmotility</p> <p>Q44.4 Choledochal cyst</p> <p>Q45.83 Congenital mesenteric cyst</p> | NA                       | YES<br>Q79.0* Congenital diaphragmatic hernia |

1  
2  
3  
4  
5  
6  
7  
8  
9  
10  
11  
12  
13  
14  
15  
16  
17  
18  
19  
20  
21  
22  
23  
24  
25  
26  
27  
28  
29  
30  
31  
32  
33  
34  
35  
36  
37  
38  
39  
40  
41  
42  
43  
44  
45  
46

| Anomaly type*                                        | Routine inclusion (per ICD-10 code blocks)                                     | Inclusions subject to criteria                                                                                                                     | Exclusions                                                                                                                                                                                                                                                                                                                                                                                                                         | Differences with EUROCAT                                                                            | Enhanced registration                 |
|------------------------------------------------------|--------------------------------------------------------------------------------|----------------------------------------------------------------------------------------------------------------------------------------------------|------------------------------------------------------------------------------------------------------------------------------------------------------------------------------------------------------------------------------------------------------------------------------------------------------------------------------------------------------------------------------------------------------------------------------------|-----------------------------------------------------------------------------------------------------|---------------------------------------|
| Reproductive system anomalies                        | Q50-Q56<br>Congenital malformations of genital organs                          | CLINICAL SIGNIFICANCE<br>Q55.6 Other congenital malformations of penis                                                                             | EXCLUDE IN ISOLATION<br>Q50.1* Developmental ovarian cyst, Q50.2 Congenital torsion of ovary, Q50.5 Embryonic cyst of broad ligament, Q52.3 Imperforate hymen, Q52.4 (part) Congenital hypertrophy of hymen, Q52.5 Fusion of labia<br>Q52.7 (part) Minor other congenital malformations of vulva<br>Q54.4 Congenital chordee<br>Q55.20 Retractable testis, Q55.21 Bifid scrotum<br><br>EXCLUDE always<br>Q53* Undescended testicle | Q52.7 (part)<br>Congenital rectovulval fistula - EUROCAT exclusion in isolation but NCARDS includes | NO                                    |
| Congenital anomalies of the kidney and urinary tract | Q60-Q64<br>Congenital malformations of the urinary system;<br>Q794 Prune Belly | MEASUREMENT / SEVERITY<br>Q62.0 Congenital hydronephrosis<br><br>CLINICAL SIGNIFICANCE<br>Q63.8 Other specified congenital malformations of kidney | EXCLUDE IN ISOLATION<br>Q61.0 Congenital single renal cyst<br>Q62.7* Congenital vesico-uretero-renal reflux<br>Q63.3 Hyperplastic and giant kidney                                                                                                                                                                                                                                                                                 | NA                                                                                                  | YES<br>Q60.1 Bilateral renal agenesis |

| Anomaly type*                                        | Routine inclusion (per ICD-10 code blocks)        | Inclusions subject to criteria                                                                                                                                                                                                            | Exclusions                                                                                                                                                                                                                                                                                                                                                                                                                                    | Differences with EUROCAT                                                               | Enhanced registration |
|------------------------------------------------------|---------------------------------------------------|-------------------------------------------------------------------------------------------------------------------------------------------------------------------------------------------------------------------------------------------|-----------------------------------------------------------------------------------------------------------------------------------------------------------------------------------------------------------------------------------------------------------------------------------------------------------------------------------------------------------------------------------------------------------------------------------------------|----------------------------------------------------------------------------------------|-----------------------|
| Congenital deformities of the musculoskeletal system | Q65-Q68<br>Congenital musculoskeletal deformities | <p>PERSISTENCE<br/>Q65.80 &amp; Q65.81<br/>Dysplastic hip</p> <p>CAUSE<br/>Q68.8 (part)<br/>Arthrogryposis, not otherwise specified</p>                                                                                                   | <p>EXCLUDE IN ISOLATION<br/>Q65.3-Q65.5 Congenital subluxation of hip, Q65.6*<br/>Unstable hip<br/>Q66.1-Q66.9 Congenital deformities of feet (except include talipes equinovarus)<br/>Q67* Congenital musculoskeletal deformities of head, face, spine and chest<br/>Q68.0 Congenital deformity of sternocleidomastoid muscle, Q68.10 Clinodactyly, Q68.21 Genu recurvatum, Q68.3-Q68.5<br/>Congenital bowing of femur, tibia and fibula</p> | Q65.80 & Q65.81<br>Dysplastic hip - EUROCAT exclusion in isolation but NCARDS includes | NO                    |
| Congenital malformations of the limbs                | Q69-Q74<br>Congenital malformations of limb(s)    | <p>CLINICAL SIGNIFICANCE<br/>Q70.2 Fused toes<br/>Q703 Webbed toes,<br/>Q70.9 Syndactyly, unspecified<br/>Q74.2 Other congenital malformations of lower limb(s), including pelvic girdle<br/>Q74.82 Congenital undergrowth of limb(s)</p> | <p>EXCLUDE IN ISOLATION<br/>Q74.0 (part) Congenital cubitus valgus, Q74.00 Accessory carpal bone</p>                                                                                                                                                                                                                                                                                                                                          | NA                                                                                     | NO                    |

1  
2  
3  
4  
5  
6  
7  
8  
9  
10  
11  
12  
13  
14  
15  
16  
17  
18  
19  
20  
21  
22  
23  
24  
25  
26  
27  
28  
29  
30  
31  
32  
33  
34  
35  
36  
37  
38  
39  
40  
41  
42  
43  
44  
45  
46

| Anomaly type*                                                         | Routine inclusion (per ICD-10 code blocks)                       | Inclusions subject to criteria                                                                                                                                                                                                                                                                                                                                                                                            | Exclusions                                                                                                                                                                                                                                                                                                                                  | Differences with EUROCAT | Enhanced registration                                                                                                                 |
|-----------------------------------------------------------------------|------------------------------------------------------------------|---------------------------------------------------------------------------------------------------------------------------------------------------------------------------------------------------------------------------------------------------------------------------------------------------------------------------------------------------------------------------------------------------------------------------|---------------------------------------------------------------------------------------------------------------------------------------------------------------------------------------------------------------------------------------------------------------------------------------------------------------------------------------------|--------------------------|---------------------------------------------------------------------------------------------------------------------------------------|
| Congenital malformations of other parts of the musculoskeletal system | Q75-Q79 Other congenital malformations of musculoskeletal system | <p>CAUSE</p> <p>Q75.02 Trigenocephaly</p> <p>CLINICAL SIGNIFICANCE</p> <p>Q75.8* Other specified congenital malformations of skull and face bones</p> <p>Q76.4 Other congenital malformations of spine, not associated with scoliosis</p> <p>GESTATIONAL AGE AT DIAGNOSIS</p> <p>Q79.5 (part) Congenital abdominal wall defect not otherwise specified</p> <p>CONSEQUENCE</p> <p>Q79.80 Congenital constriction bands</p> | <p>EXCLUDE IN ISOLATION</p> <p>Q75.00 (part) Brachycephaly, Q75.2 Hypertelorism, Q75.3* Macrocephaly</p> <p>Q76.0 Spina bifida occulta, Q76.43 Congenital lordosis, postural, Q76.5 Cervical rib, Q76.60 Congenital absence of rib, Q76.62 Accessory rib, Q76.71 Sternum bifidum</p> <p>Q79.5 (part) - Congenital divarication of recti</p> | NA                       | <p>YES</p> <p>Q77*/Q78* (part) Lethal and severe skeletal dysplasias e.g. Thanatophoric dysplasia, Short rib-polydactyly syndrome</p> |



| Anomaly type*                          | Routine inclusion (per ICD-10 code blocks)        | Inclusions subject to criteria | Exclusions                                                                                                                                                                                                                                                                                                                    | Differences with EUROCAT | Enhanced registration |
|----------------------------------------|---------------------------------------------------|--------------------------------|-------------------------------------------------------------------------------------------------------------------------------------------------------------------------------------------------------------------------------------------------------------------------------------------------------------------------------|--------------------------|-----------------------|
| Integument anomalies                   | Q80-Q84<br>Congenital malformations of integument | NA                             | EXCLUDE IN ISOLATION<br>Q82.5* Congenital non-neoplastic naevus, Q82.8 (part)<br>Dermatoglyphic anomalies, Q82.80 Abnormal palmar creases, Q82.81 Accessory skin tags<br>Q83.3 Accessory nipple<br>Q84.2 (part) Persistent lanugo, Q84.5 (part) Enlarged or hypertrophic nails, Q84.6 Other congenital malformations of nails | NA                       | NO                    |
| Phakomatoses, not elsewhere classified | Q85<br>Phakomatoses, not elsewhere classified     | NA                             | NA                                                                                                                                                                                                                                                                                                                            | NA                       | NO                    |

| Anomaly type*                           | Routine inclusion (per ICD-10 code blocks)                                                     | Inclusions subject to criteria                                                                                                                                                                                                               | Exclusions                                                                  | Differences with EUROCAT | Enhanced registration |
|-----------------------------------------|------------------------------------------------------------------------------------------------|----------------------------------------------------------------------------------------------------------------------------------------------------------------------------------------------------------------------------------------------|-----------------------------------------------------------------------------|--------------------------|-----------------------|
| Teratogenic syndromes                   | Q86* Congenital malformation syndromes due to known exogenous causes, not elsewhere classified | MATERNAL HISTORY & CONSEQUENCE<br>Q86.0 Fetal alcohol syndrome<br><br>KNOWN AETIOLOGY & CONSEQUENCE<br>Q86.1-Q86.8* Fetal hydantoin syndrome, Fetal warfarin syndrome, Other congenital malformation syndromes due to known exogenous causes | NA                                                                          | NA                       | NO                    |
| Other congenital malformation syndromes | Q87* Other specified congenital malformation syndromes (multiple systems)                      | NA                                                                                                                                                                                                                                           | EXCLUDE IN ISOLATION<br>Q87.4 (part) Arachnodactyly not otherwise specified | NA                       | NO                    |
| Other anomalies                         | Q89* Other congenital malformations, not elsewhere classified                                  | NA                                                                                                                                                                                                                                           | EXCLUDE IN ISOLATION<br>Q89.9 Congenital malformation, unspecified          | NA                       | NO                    |

| Anomaly type*        | Routine inclusion (per ICD-10 code blocks)                                                                                                                                                                          | Inclusions subject to criteria                                                                          | Exclusions                                                                                                                                                                                                                                | Differences with EUROCAT                                                                                                                                                                                                    | Enhanced registration                                                      |
|----------------------|---------------------------------------------------------------------------------------------------------------------------------------------------------------------------------------------------------------------|---------------------------------------------------------------------------------------------------------|-------------------------------------------------------------------------------------------------------------------------------------------------------------------------------------------------------------------------------------------|-----------------------------------------------------------------------------------------------------------------------------------------------------------------------------------------------------------------------------|----------------------------------------------------------------------------|
| Chromosomal          | Q90-Q99<br>Chromosomal                                                                                                                                                                                              | IF REGISTRABLE ANOMALY<br>Q95* Balanced rearrangements and structural markers, not elsewhere classified | EXCLUDE always<br>Q95.0 Balanced translocation and insertion in normal individual,<br>Q95.1 Chromosome inversion in normal individual, Q95.4<br>Individuals with marker heterochromatin, Q95.5<br>Individuals with autosomal fragile site | NA                                                                                                                                                                                                                          | YES<br>Q90* Down's syndrome<br>Q91* Edwards' syndrome and Patau's syndrome |
| Congenital neoplasms | D15.1 Cardiac rhabdomyoma<br>D18.10 Cystic hygroma (congenital)<br>D21.5 Sacrococcygeal teratoma, Sacral teratoma<br>D21.9 Rhabdomyoma of other organs [i.e. not heart]<br>D48.7 Teratoma, not elsewhere classified | CLINICAL SIGNIFICANCE<br>D18.0 Haemangioma, any site, D18.1 Lymphangioma, any site                      | NA                                                                                                                                                                                                                                        | EUROCAT exclusion but NCARDS includes<br>D15.1 Cardiac rhabdomyoma, D18.0 Haemangioma, any site, D18.1 Lymphangioma, any site, D21.9 Rhabdomyoma of other organs [i.e. not heart], D48.7 Teratoma, not elsewhere classified | NO                                                                         |
| Di George syndrome   | D82.1 Di George syndrome                                                                                                                                                                                            | NA                                                                                                      | NA                                                                                                                                                                                                                                        | NA                                                                                                                                                                                                                          | NO                                                                         |

| Anomaly type*                       | Routine inclusion (per ICD-10 code blocks)                          | Inclusions subject to criteria                                                                                                                                 | Exclusions                                                                            | Differences with EUROCAT               | Enhanced registration |
|-------------------------------------|---------------------------------------------------------------------|----------------------------------------------------------------------------------------------------------------------------------------------------------------|---------------------------------------------------------------------------------------|----------------------------------------|-----------------------|
| Waardenburg syndrome                | E70.30 Waardenburg syndrome                                         | NA                                                                                                                                                             | NA                                                                                    | NA                                     | NO                    |
| Cystic fibrosis                     | E84* Cystic fibrosis                                                | NA                                                                                                                                                             | NA                                                                                    | EUROCAT exclusion but NCARDRS includes | NO                    |
| Spinal muscular atrophy             | G12* Spinal muscular atrophy and related syndromes                  | NA                                                                                                                                                             | NA                                                                                    | EUROCAT exclusion but NCARDRS includes | NO                    |
| Congenital chylothorax              | NA                                                                  | NA                                                                                                                                                             | EXCLUDE IN ISOLATION<br>I89.8 Chylothorax (lymphatic);<br>J94.0 Chylothorax (chylous) | NA                                     | NO                    |
| Paralysis of vocal cords and larynx | NA                                                                  | NA                                                                                                                                                             | EXCLUDE IN ISOLATION<br>J38.0 Paralysis of vocal cords and larynx                     | NA                                     | NO                    |
| Micrognathia                        |                                                                     | SEVERITY<br>K07.0 Micrognathia                                                                                                                                 | NA                                                                                    | NA                                     | NO                    |
| Placental transfusion syndromes     | P02.3 Fetus and newborn affected by placental transfusion syndromes | INCLUDE IN ISOLATION<br>P02.3 (part) Twin reversed arterial perfusion sequence<br><br>IF REGISTRABLE ANOMALY<br>P02.3 (part) Twin-to-twin transfusion syndrome | NA                                                                                    | NA                                     | NO                    |

| Anomaly type*         | Routine inclusion (per ICD-10 code blocks)          | Inclusions subject to criteria                                                                                                             | Exclusions                                                       | Differences with EUROCAT               | Enhanced registration |
|-----------------------|-----------------------------------------------------|--------------------------------------------------------------------------------------------------------------------------------------------|------------------------------------------------------------------|----------------------------------------|-----------------------|
| Congenital infections | P35.8 Congenital zika virus infection               | IF REGISTRABLE ANOMALY<br>P35.0 Congenital rubella syndrome,<br>P35.1 Congenital cytomegalovirus infection, P37.1 Congenital toxoplasmosis | NA                                                               | NA                                     | NO                    |
| Hydrops fetalis       | P83.2 Hydrops fetalis not due to haemolytic disease | NA                                                                                                                                         | EXCLUDE always<br>P56* Hydrops fetalis due to haemolytic disease | EUROCAT exclusion but NCARDRS includes | NO                    |
| Congenital hypotonia  | NA                                                  | NA                                                                                                                                         | EXCLUDE always<br>P94.2 Congenital hypotonia                     | NA                                     | NO                    |

\* Anomaly type is organised according to ICD-10/BPA system<sup>1</sup> with some amendments to align with EUROCAT subgroup coding<sup>2</sup>, but allowing greater granularity.

<sup>1</sup>World Health Organization. ICD-10: International Statistical Classification of Diseases and Related Health Problems. Geneva: World Health Organization; 2010.

<sup>2</sup>[https://eu-rd-platform.jrc.ec.europa.eu/system/files/public/eurocat/Guide\\_1.5\\_Chapter\\_3.3.pdf](https://eu-rd-platform.jrc.ec.europa.eu/system/files/public/eurocat/Guide_1.5_Chapter_3.3.pdf)

# BMJ Open

## COHORT PROFILE : THE NATIONAL CONGENITAL ANOMALY REGISTRATION DATASET IN ENGLAND

|                                 |                                                                                                                                                                                                                                                                                                                                                                                                                                                                                                                                                                                                                                                                                                                                                                                                               |
|---------------------------------|---------------------------------------------------------------------------------------------------------------------------------------------------------------------------------------------------------------------------------------------------------------------------------------------------------------------------------------------------------------------------------------------------------------------------------------------------------------------------------------------------------------------------------------------------------------------------------------------------------------------------------------------------------------------------------------------------------------------------------------------------------------------------------------------------------------|
| Journal:                        | <i>BMJ Open</i>                                                                                                                                                                                                                                                                                                                                                                                                                                                                                                                                                                                                                                                                                                                                                                                               |
| Manuscript ID                   | bmjopen-2023-077743.R2                                                                                                                                                                                                                                                                                                                                                                                                                                                                                                                                                                                                                                                                                                                                                                                        |
| Article Type:                   | Cohort profile                                                                                                                                                                                                                                                                                                                                                                                                                                                                                                                                                                                                                                                                                                                                                                                                |
| Date Submitted by the Author:   | 05-Dec-2023                                                                                                                                                                                                                                                                                                                                                                                                                                                                                                                                                                                                                                                                                                                                                                                                   |
| Complete List of Authors:       | Broughan, Jennifer; NHS England, Data and Analytics Directorate<br>Wreyford, Ben; NHS England, Data and Analytics Directorate<br>Martin, Danielle; NHS England, Data and Analytics Directorate<br>Melis, Gabriella; NHS England, Data and Analytics Directorate<br>Randall, Kay; NHS England, Data and Analytics Directorate<br>Obaro, Ewoma; NHS England, Data and Analytics Directorate<br>Broggio, John; NHS Digital, National Disease Registration Service<br>Aldridge, Nicholas; NHS England, Data and Analytics Directorate<br>Stoianova, Sylvia; NHS England<br>Johnson, Chloe; NHS England, Data and Analytics Directorate<br>Gibbard, Donna; NHS England, Data and Analytics Directorate<br>Stevens, Sarah; NHS England<br>Fleming, Kate M; NHS England, Data & Analytics Transformation Directorate |
| <b>Primary Subject Heading</b>: | Epidemiology                                                                                                                                                                                                                                                                                                                                                                                                                                                                                                                                                                                                                                                                                                                                                                                                  |
| Secondary Subject Heading:      | Public health, Obstetrics and gynaecology, Paediatrics                                                                                                                                                                                                                                                                                                                                                                                                                                                                                                                                                                                                                                                                                                                                                        |
| Keywords:                       | EPIDEMIOLOGY, PUBLIC HEALTH, REGISTRIES, NEONATOLOGY, PAEDIATRICS, Electronic Health Records                                                                                                                                                                                                                                                                                                                                                                                                                                                                                                                                                                                                                                                                                                                  |
|                                 |                                                                                                                                                                                                                                                                                                                                                                                                                                                                                                                                                                                                                                                                                                                                                                                                               |

SCHOLARONE™  
Manuscripts



I, the Submitting Author has the right to grant and does grant on behalf of all authors of the Work (as defined in the below author licence), an exclusive licence and/or a non-exclusive licence for contributions from authors who are: i) UK Crown employees; ii) where BMJ has agreed a CC-BY licence shall apply, and/or iii) in accordance with the terms applicable for US Federal Government officers or employees acting as part of their official duties; on a worldwide, perpetual, irrevocable, royalty-free basis to BMJ Publishing Group Ltd ("BMJ") its licensees and where the relevant Journal is co-owned by BMJ to the co-owners of the Journal, to publish the Work in this journal and any other BMJ products and to exploit all rights, as set out in our [licence](#).

The Submitting Author accepts and understands that any supply made under these terms is made by BMJ to the Submitting Author unless you are acting as an employee on behalf of your employer or a postgraduate student of an affiliated institution which is paying any applicable article publishing charge ("APC") for Open Access articles. Where the Submitting Author wishes to make the Work available on an Open Access basis (and intends to pay the relevant APC), the terms of reuse of such Open Access shall be governed by a Creative Commons licence – details of these licences and which [Creative Commons](#) licence will apply to this Work are set out in our licence referred to above.

Other than as permitted in any relevant BMJ Author's Self Archiving Policies, I confirm this Work has not been accepted for publication elsewhere, is not being considered for publication elsewhere and does not duplicate material already published. I confirm all authors consent to publication of this Work and authorise the granting of this licence.

1  
2  
3  
4  
5  
6 COHORT PROFILE : THE NATIONAL CONGENITAL ANOMALY REGISTRATION DATASET IN ENGLAND  
7  
8

9 Jennifer M Broughan, Ben Wreyford, Danielle Martin, Gabriella Melis, Kay Randall, Ewoma Obaro,  
10  
11 John Broggio, Nicholas Aldridge , Sylvia Stoianova, Chloe Johnson, Donna Gibbard, Sarah Stevens &  
12  
13 Kate Fleming  
14

15  
16 National Congenital Anomaly and Rare Disease Registration Service, National Disease Registration  
17  
18 Service, Data and Analytics Directorate, NHS England, 7 Wellington Pl, Whitehall Rd, Leeds LS1 4EG,  
19  
20  
21 UK.  
22

23  
24 Word count (not including references or abstract): 3919  
25

26  
27 Jennifer M Broughan, [Jennifer.Broughan@nhs.net](mailto:Jennifer.Broughan@nhs.net)

28 Ben Wreyford, [ben.wreyford@nhs.net](mailto:ben.wreyford@nhs.net)

29  
30 Danielle Martin, [Danielle.Martin17@nhs.net](mailto:Danielle.Martin17@nhs.net)

31  
32 Gabriella Melis, [Gabriella.Melis1@nhs.net](mailto:Gabriella.Melis1@nhs.net)

33  
34 Kay Randall, [kay.randall@nhs.net](mailto:kay.randall@nhs.net)

35  
36 Ewoma Obaro, [ewoma.obaro@nhs.net](mailto:ewoma.obaro@nhs.net)

37  
38 John Broggio, [john.broggio@nhs.net](mailto:john.broggio@nhs.net)

39  
40 Nicholas Aldridge, [nicholas.aldridge@nhs.net](mailto:nicholas.aldridge@nhs.net)

41  
42 Sylvia Stoianova, [Sylvia.Stoianova@bristol.ac.uk](mailto:Sylvia.Stoianova@bristol.ac.uk)

43  
44 Chloe Johnson, [Chloe.Johnson6@dhsc.gov.uk](mailto:Chloe.Johnson6@dhsc.gov.uk)

45  
46 Donna Gibbard, [donna.gibbard@nhs.net](mailto:donna.gibbard@nhs.net)

47  
48 Sarah Stevens, [sarah.stevens1@nhs.net](mailto:sarah.stevens1@nhs.net)

49  
50 Kate M Fleming, [kate.fleming5@nhs.net](mailto:kate.fleming5@nhs.net)

51  
52 Correspondence to:

53 Jennifer Broughan, PhD

54  
55 National Disease Registration Service

56  
57 NHS England

58  
59 7 and 8 Wellington Pl,  
60



1  
2  
3  
4  
5  
6  
7  
8  
9  
10  
11  
12  
13  
14  
15  
16  
17  
18  
19  
20  
21  
22  
23  
24  
25  
26  
27  
28  
29  
30  
31  
32  
33  
34  
35  
36  
37  
38  
39  
40  
41  
42  
43  
44  
45  
46  
47  
48  
49  
50  
51  
52  
53  
54  
55  
56  
57  
58  
59  
60

Whitehall Rd,

Leeds

LS1 4EG,

UK.

[Jennifer.Broughan@nhs.net](mailto:Jennifer.Broughan@nhs.net)

Tel +44 7769282928

ORCID 0000-0002-4450-2147

For peer review only

## ABSTRACT

### **Purpose**

The National Congenital Anomaly and Rare Disease Registration Service (NCARDRS), part of National Disease Registration Service (NDRS) in NHS England, quality assures, curates and analyses individual data on the pregnancies, fetuses, babies, children and adults with congenital anomalies and rare diseases across England. The congenital anomaly (CA) register provides a resource for patients and their families, clinicians, researchers, and public health professionals in furthering the understanding of CAs.

### **Participants**

NCARDRS registers CAs occurring in babies born alive and stillborn, fetal losses and terminations in England. NCARDRS collects data from secondary and tertiary health care providers, private providers and laboratories covering fetal medicine, maternity or paediatric services. Data describe the pregnancy, mother, baby, and anomaly. Established in 2015, NCARDRS expanded CA registration coverage from 22% of total births in England in 2015 until national coverage was achieved in 2018. Prior to 2015, data collection was performed independently by regional registers in England; this data is also held by NCARDRS.

### **Findings to date:**

NCARDRS registers approximately 21,000 babies with CAs per year with surveillance covering 600,000 total births, making it the register with the largest birth coverage globally. Data on prevalence, risk factors and survival for children with CAs are available. Data has been used in several peer-reviewed publications. Birth prevalence statistics, including public health indicators such as the association with maternal age, infant and perinatal mortality, are published annually. NCARDRS supports clinical audit for screening programmes and service evaluation.

### **Future plans:**

1  
2  
3 NCARDRS provides a valuable resource for the understanding of the epidemiology,  
4 surveillance, prevention and treatment of CAs. Currently, approximately 21,000 new  
5 registrations of babies or fetuses with suspected or confirmed CAs are added each year.  
6 Identifiers are collected, enabling linkage to routinely-collected healthcare and population  
7 statistics, further enhancing the value of the data.  
8  
9  
10  
11  
12  
13

### 14 Key words

15  
16  
17  
18 Epidemiology, Public Health, Registries, neonatology, paediatrics  
19  
20  
21

### 22 Strengths and limitations

- 23  
24  
25  
26  
27  
28  
29  
30  
31  
32  
33  
34  
35  
36  
37  
38  
39  
40  
41  
42  
43  
44  
45  
46  
47  
48  
49  
50  
51  
52  
53  
54  
55  
56  
57  
58  
59  
60
- Congenital anomaly registration coverage has been national across England since 2018 (approximately 21,000 anomalies registered from 600,000 total births per year), enabling the calculation of accurate estimates of prevalence, even for rare congenital anomalies.
  - NCARDRS collects personal identifiers and data are linked to other routinely collected administrative and health care data, allowing assessment of long-term outcome and survival over the life course of the baby, as well as associations with health inequalities and other risk factors.
  - NCARDRS provides data on all birth outcomes, including live births, stillbirths, fetal losses and terminations.
  - Case-ascertainment is good for severe conditions, or those that are more frequently diagnosed antenatally or in the neonatal period.
  - Registration and case ascertainment in NCARDRS regions that initiated congenital anomaly registration from 2018 continues to develop and is progressing well.

## INTRODUCTION

Congenital anomalies are a significant source of morbidity, mortality and long-term care needs in children. Approximately 2-3% of children born in Europe have a congenital anomaly(1) which are defined as conditions present at birth and include structural, chromosomal, genetic and biochemical conditions. Some congenital anomalies are detected during pregnancy, some are found at birth, while others are diagnosed only as a baby grows older. In England and Wales, congenital anomalies were the most common cause of death in the post neonatal period in 2020, accounting for 36.3% of deaths(2). Globally it is estimated that 240,000 newborns die within the neonatal period as a result of congenital anomalies(3).

Registration of congenital anomalies became established in many countries from the 1960s and 70s as a consequence of the thalidomide tragedy and serves multiple purposes supporting epidemiology and public health(4). The National Congenital Anomaly and Rare Disease Registration Service (NCARDRS) is part of the National Disease Registration Service (NDRS) of NHS England which collects, quality assures and analyses data on all people living in England with cancer(5), congenital anomalies and rare diseases. NCARDRS curates a population-based congenital anomaly registry, collecting data on the pregnancies, fetuses, babies, children and adults with congenital anomalies across the whole of England. Data is collected to further the understanding of the causes of congenital anomalies, to inform the commission of public services, to audit health and social care and to provide information for patients, their carers and clinicians on their condition. To achieve this NCARDRS collects data from health care settings across England. In England, health care is publicly funded and delivered in a centralised and universal way by the National Health Service (NHS).

The UK Rare Disease Strategy, developed in 2013, aimed to improve the lives of those with rare diseases, focusing on patient empowerment, identification and prevention, diagnosis and treatment and the role of research and recommended the expansion of existing data collections(6, 7). Established in 2015 in response, NCARDRS assumed responsibility for

1  
2  
3 congenital anomaly registration in regions with an existing register and expanded  
4 geographically to provide congenital anomaly registration across the whole country(8) (Figure  
5 1). Prior to 2015, data collection was performed independently by regional registers operating  
6 across some areas of England, covering up to 32% of births. NCARDRS continues to host the  
7 regional registers' legacy registration data. A national congenital anomaly surveillance system  
8 was attempted by the UK Office of National Statistics (ONS) but this was closed in 2010  
9 following concerns about data quality and completeness(9). NCARDRS national coverage for  
10 registration and reporting has been in place for babies born since 2018(10).  
11  
12  
13  
14  
15  
16  
17  
18  
19  
20  
21  
22  
23  
24  
25

## 26 COHORT DESCRIPTION

### 27 28 29 30 31 32 33 34 Study population

35  
36  
37 NCARDRS registers congenital anomalies that occur in babies that are live born and stillborn,  
38 fetal losses and terminations at any gestation delivered in England. NCARDRS does not have  
39 a minimum gestation for fetal loss and registers all fetal losses reported, although in line with  
40 international standards(11) only anomalies that occur in live births, stillbirths, terminations at  
41 any gestation and fetal losses between 20-24 completed weeks of gestation are included in  
42 prevalence reporting(12, 13). There are approximately 600,000 live births and stillbirths in  
43 England every year. There is no upper age limit and information can be added for children as  
44 they grow older Information on survival and vital status is updated at least annually.  
45  
46  
47  
48  
49  
50  
51  
52  
53

54  
55 Inclusion and exclusion criteria for registration of congenital anomalies in NCARDRS follow  
56 internationally recognised formats(11) and all registrations are coded to international  
57 standards. Anomalies are clinically coded to international standards using the World Health  
58  
59  
60

1  
2  
3 Organisation's International Classification of Diseases 10<sup>th</sup> revision (ICD-10)(14) with the  
4 British Paediatric Association (BPA) Adaptation, which gives supplementary one-digit  
5 extensions to ICD-10 codes to allow greater specificity of coding(11). Inclusion criteria are  
6 based on international guidance(11) predominantly covering the Q chapter in ICD-10. A  
7 detailed summary of the current inclusion and exclusion criteria is presented in Table S1 in  
8 the supplementary materials. NCARDRS excludes cases with an isolated minor anomaly as  
9 specified by the European network of population-based registries for the epidemiological  
10 surveillance of congenital anomalies (EUROCAT)(11). However, if minor anomalies occur in  
11 association with other anomalies, then these are registered.

12  
13  
14  
15  
16  
17  
18  
19  
20  
21  
22 Denominator data is obtained from the UK Office for National Statistics (ONS). Individual level  
23 birth data are available and are aggregated according to requirements.

## 24 25 26 27 28 29 30 31 32 33 34 35 36 37 38 39 40 41 42 43 44 45 46 47 48 49 50 51 52 53 54 55 56 57 58 59 60 Registration model and source data

NCARDRS employs a multisource, event-based registration model. Over the life course of a patient, NCARDRS can be notified antenatally, at birth or in the neonatal period and beyond as the child is treated by various paediatric specialist services. Registration data are processed, held on a custom-built live data management application, and regularly cloned to a separate PostgreSQL database which creates regular snapshots of data for analysis, reporting and data release (Figure 2).

The data collected by NCARDRS come from a range of sources including maternity units, multidisciplinary team meetings, postmortem reports, molecular testing results, treatment records, hospital patient administration systems, clinical data systems, national data sets describing hospital activity, clinical biochemistry and genetics laboratories. Hospital trusts, including all trusts with a maternity or paediatric service, submit data which are processed and combined by trained registration officers into a comprehensive clinical record of each baby and anomaly.

1  
2  
3 Data can be submitted at the individual case-level or in large data extracts from clinical  
4 management data systems. Custom-built extracts from neonatal clinical data management  
5 systems (BadgerNet), including remote access to the record itself, are available for 94% of  
6 the trusts with a neonatal unit in England. Extracts of relevant data from fetal medicine  
7 software systems including fetal medicine (Viewpoint; Astraia) and specific services  
8 (HeartSuite) have been developed in conjunction with software suppliers; these extracts are  
9 produced and submitted to NCARDRS by the provider.  
10  
11

12 Information from providers is combined with routinely collected national data utilised for both  
13 data quality and case-ascertainment purposes. Linkage is conducted through NHS number  
14 or through date of birth, full name and address. Cases with defined ICD-10 codes that have  
15 been validated for accuracy are identified from Hospital Episode Statistics (HES) for  
16 ascertainment purposes. HES consists of routinely recorded, administrative data describing  
17 each hospital admission in the NHS(15). As well as demographic information on the patient,  
18 the primary reason for admission and any co-morbidities are recorded using ICD-10 codes.  
19 Death certificate data from the Office for National Statistics (ONS) is provided to NCARDRS  
20 monthly for children born alive after 1<sup>st</sup> January 2018 and where a relevant ICD-10 coded  
21 condition (within a specified range) is listed as a cause of death. Information about babies that  
22 were born alive or stillborn after 24 weeks gestation (civilly registrable in England) is  
23 supplemented using birth registration information supplied by the ONS. Survival for all patients  
24 recorded is updated at least annually by linkage with the NHS Personal Demographics Service  
25 (PDS) on [NHS Spine](#), a collection of national databases that holds electronic records of  
26 important patient information and demographics.  
27  
28  
29  
30  
31  
32  
33  
34  
35  
36  
37  
38  
39  
40  
41  
42  
43  
44  
45  
46  
47  
48  
49  
50  
51  
52

### 53 Data processing

54  
55  
56  
57 Once received, identifiable patient data are processed by trained registration officers.  
58 Processing involves manual extraction of clinical information from clinical reports and letters  
59  
60

1  
2  
3 or free text comments in clinical software systems. Registration officers require detailed  
4 knowledge of congenital anomalies, clinical coding and clinical pathways for the range of  
5 different conditions collected. As NCARDRS is a multisource register, patient identifiers are  
6 required to ensure that there is no duplication, and that incoming data is linked to the correct  
7 baby and pregnancy. Where cases are entered manually, patient identifiers are checked  
8 manually using the Summary Care Record on NHS Spine. Further information is requested  
9 from the relevant clinician or obtained by direct, manual interrogation of patient records by  
10 registration officers via secure remote access to a hospital's clinical software systems or  
11 clinical documents where this is available.  
12  
13  
14  
15  
16  
17  
18  
19  
20  
21

22 Data are input onto the data management system in two ways: 1) data on individual patients  
23 submitted by providers are assessed by trained registration officers and manually entered or  
24 2) data from electronic sources are loaded via a semi-automatic process known as the data  
25 waterfall (Figure 2). The data waterfall is a process which loads data from electronic sources.  
26 Its purpose is to perform basic validations on the data, confirm the patient's demographic  
27 information (via NHS Spine), match the patient to an existing patient (or create a new patient  
28 record) and create records, such as a screening or diagnostic test event which can be  
29 processed by registry staff. Most cases consist of information processed by both manual and  
30 automatic methods.  
31  
32  
33  
34  
35  
36  
37  
38  
39  
40  
41  
42  
43  
44  
45  
46  
47  
48  
49  
50  
51  
52  
53  
54  
55  
56  
57  
58  
59  
60



1  
2  
3 Anomalies are registered according to varying degrees of certainty depending on the clinical  
4 evidence available; confirmed, probable or suspected. Anomalies remain at the level of  
5 suspected until the evidence supporting the diagnosis of the anomaly attains agreed  
6 confirmation criteria. These criteria have been established with clinical input and consider  
7 the method by which the diagnosis is made, the specialism and confidence of the reporting  
8 clinician, the gestational or postnatal age at which the anomaly was identified, and the  
9 reliability of data sources. Criteria are different for each type of anomaly and a baby can  
10 have multiple anomalies, each with different statuses, depending on the level of evidence  
11 available for each one. Not all anomalies can be confirmed by the gold standard diagnostic  
12 test. Where there is a confident diagnosis by a relevant specialist in the field and the  
13 evidence is well described a probable confirmation status is used. Only data on probable  
14 and confirmed cases are used for routine reporting and analysis purposes and both are  
15 considered reportable.

## 31 Data structure

32  
33  
34  
35 Registration is framed at the level of the anomaly, baby, pregnancy and birth mother. The data  
36 are organised into over 600 raw tables which are in turn further organised into a series of  
37 approximately 100 custom-built analytical views, tables and lookup tables reflecting five main  
38 thematic groups, mother, pregnancy, baby, anomaly and test, with one-to-many relationships  
39 across all. Each table contains a primary key that uniquely identifies records within that table  
40 and allows joins between tables. A baby and a mother are each assigned a unique identifier.  
41  
42  
43  
44  
45  
46  
47  
48  
49  
50  
51  
52  
53  
54  
55  
56  
57  
58  
59  
60  
Registration records are never closed and new events can be added if new information is  
submitted.

## Key data fields

Detailed clinical and demographic information on the mother, baby, anomaly and pregnancy is recorded (Table 1). Multiple anomalies can be registered against a baby, each with different evidence and confirmation status.

NCARDRS works closely with the NHS Fetal Anomaly Screening Programme (FASP) to audit the detection of 15 conditions groups and these conditions are subject to enhanced registration. To facilitate this audit, more extensive information on antenatal screening and the nature and timing of diagnostic testing is collected for these conditions and other closely related or similar conditions. The conditions that are covered by this enhanced registration include severe cardiac anomalies, trisomy 13, trisomy 18 and trisomy 21, neural tube defects, lethal skeletal dysplasia, cleft lip+/palate, bilateral renal agenesis, abdominal wall anomalies and congenital diaphragmatic hernia (see Table S1 in the supplementary materials). These 15 condition groups reflected 35% (n=4501) of the 13,065 babies registered with a confirmed or probable congenital anomaly in 2020.

## Data Quality

Automatic and manual quality checks are embedded into the registration process at points of entry, at the level of the individual record and on the birth cohort as a whole prior to finalisation of the data for reporting. As well as internal data quality indicators (DQIs), the data are evaluated against DQIs for international bodies against known targets(16). For example, the prevalence of anencephaly is reported as an indicator of ascertainment of conditions detected at earlier gestations. Other DQIs focus on the accuracy of diagnosis, for example the number of babies with more than one anomaly, or the prevalence of selected codes that have used the BPA extension code in addition to the ICD-10 code.

## Patient and public involvement

Patient groups and third sector organisations representing patients were involved in the design of this register-based cohort and were members of an expert committee of stake holders made up of academics, clinicians, third sector organisation and patient interest groups that oversaw the formation of NCARDRS.

## Ethical approval and governance arrangements

NCARDRS has legal permission to collect patient-level data on those with a confirmed or suspected congenital anomaly or rare disease for specified purposes, without consent, to use it to protect the health of the population. Data are collected under legal instructions known as Directions, from the Secretary of State for Health and Social Care, made in accordance with section 254 of the Health and Social Care Act 2012 (2012 Act)(17). Strict technical and contractual controls are put in place to prevent unauthorized access and use of the data, with staff undergoing regular training on data protection and information governance.

## FINDINGS TO DATE

As of June 2023, NCARDRS held information on 117,682 mothers and 121,184 babies born in England since 2015. Table 2 shows the number of babies and other characteristics registered in regions with full congenital anomaly registration coverage by year of birth.

NCARDRS currently collects data on more than 1,000 different congenital anomalies, many of which are rare diseases, and provides expert analysis and interpretation of the data across a wide range of national and international functions. The data are available as a source of

1  
2  
3 intelligence for clinicians, public health, health-care performance, basic and applied research,  
4 patient groups, academics and commissioning and industry partners. A summary of the data  
5 is published each year describing congenital anomalies in England in the context of  
6 prevalence reported by anomaly group, timing of diagnosis and important public health  
7 indicators such as maternal age and infant mortality(10, 13, 18-21). In 2020, NCARDRS  
8 reported a total of 13,065 babies with one or more confirmed or probable congenital anomalies  
9 in 589,454 total births (live births and stillbirths), giving an overall birth prevalence of 221.7  
10 per 10,000 total births (95% confidence intervals (CI) 217.9 - 225.5) or 1 for every 45  
11 births(13). The rate of perinatal mortality associated with a congenital anomaly was highest  
12 for genetic disorders (3.1 per 10,000 total births, 95% CI 2.7-3.6), followed by congenital heart  
13 anomalies (2.8 per 10,000 total births, 95% CI 2.4-3.2). Infant mortality rate was highest for  
14 congenital heart anomalies (4.9 per 10,000 live births, 95% CI 4.4-5.5), followed by genetic  
15 conditions (3.0 per 10,000 live births, 95% CI 2.6-3.5). The rate of genetic conditions in babies  
16 born to women over 40 years old was almost 7 times higher relative to babies born to mothers  
17 under 20 years old (risk ratio equal to 6.9, 95% CI 5.2-9.2).

18  
19  
20  
21  
22  
23  
24  
25  
26  
27  
28  
29  
30  
31  
32  
33  
34  
35  
36  
37  
38  
39  
40  
41  
42  
43  
44  
45  
46  
47  
48  
49  
50  
51  
52  
53  
54  
55  
56  
57  
58  
59  
60  
Congenital anomaly registration data for England is submitted to international bodies to  
allowing pooling of data across a wider geographical area to support analysis into causes of  
these rare conditions and how to prevent them. Data is submitted annually to EUROCAT and  
to the International Clearinghouse for Birth Defects Surveillance and Research (ICBDSR).  
Surveillance is performed annually using internationally recognised tools to identify potential  
clusters of anomalies and changes in trends(22).

NCARDRS works closely with NHS Screening Programmes delivering service evaluation for  
antenatal and new-born screening services. NCARDRS audits the detection of the conditions  
included in the Fetal Anomaly Screening Programme (FASP) (see Table S1 in the  
supplementary materials) and, to enable this, these conditions are subject to enhanced  
registration and active ascertainment. By linking information at patient level, NCARDRS  
creates a longitudinal record of the screening and diagnostic pathway for each mother, fetus,

1  
2  
3 or baby, enabling analysis of the efficacy of the tests, the behavioural choices on the pathway,  
4 and the operational standards of the service. NCARDRS have recently published the first  
5 national study of fetal anomaly ultrasound scan detection rates in England (23). The data is  
6 used to provide reliable information about the quality of screening services at local, regional  
7 and national level and contributes towards the safety and effectiveness of screening services.  
8 Each screening provider receives a report detailing hospital-level detection rates and also  
9 individual case-level detection status to allow further clinical audit and identify training  
10 requirements. NCARDRS is supporting the NHS evaluative roll-out of non-invasive prenatal  
11 testing (NIPT) for Edwards' syndrome, Patau's syndrome, and Down's syndrome in  
12 England(24). Routine laboratory surveillance is conducted on a monthly, quarterly and annual  
13 level, and test performance will be evaluated by linking laboratory and registration data.

14  
15  
16  
17  
18  
19  
20  
21  
22  
23  
24  
25  
26  
27  
28  
29  
30  
31  
32  
33  
34  
35  
36  
37  
38  
39  
40  
41  
42  
43  
44  
45  
46  
47  
48  
49  
50  
51  
52  
53  
54  
55  
56  
57  
58  
59  
60

At the start of the COVID-19 pandemic, NCARDRS informed the production of the Shielded Patient List (SPL)(25) by identifying individuals living with congenital anomalies and selected rare diseases that may have been at increased risk from COVID-19 infection and NCARDRS will support the continued evaluation of vaccines against COVID-19 in pregnancy(26).

Many publications use datasets that predate NCARDRS including the legacy regional registers. NCARDRS data has been used to examine the epidemiology of congenital anomalies across Europe including Dandy-Walker syndrome(27), VACTERL association (28, 29) , neural tube defects (30), aplasia cutis(31) achondroplasia(32) and vascular disruption anomalies(33). Studies aim to improve outcomes of babies with a congenital anomaly and to inform policy so that some may be prevented, for example to justify the fortification of flour with folic acid. Recently, the UK government announced plans for the fortification of flour with folic acid to reduce neural tube defects(34). NCARDRS will support the evaluation and monitoring of the impact of implementation of this policy(35).

## STRENGTHS AND LIMITATIONS:

## National Coverage

The key strength of the NCARDRS data set is its national coverage across a large birth population. NCARDRS is the largest register in Europe(36) in both size of population and representativeness. With complete population coverage of pregnancies from 2018 onwards, the data are representative and comprehensive, capitalising on the centralised nature of English health care. Registration records are never closed, and data can continue to passively accumulate, enriching each record and facilitating the potential identification of future syndromes or providing more information on the phenotypic manifestations of genetic differences identified later in life.

## Multisource ascertainment

An NCARDRS congenital anomaly record can be made up of multiple difference sources, some automatically added and manually verified. Clinical information, often obtained by the treating clinician, is combined with cytogenetic laboratory data, data from routinely collected hospital activity and national statistics, and extracts from clinical systems to make a cohesive and comprehensive record detailing the phenotype. A registration record is never closed, allowing for the possibility of adding further genomic data as it becomes available with the wider use of whole genome sequencing.

## Standardised disease coding and data entry

The development of NCARDRS has demonstrated that it is possible to conduct national registration on a large population using standardised approaches to data collection and management, disease coding, data classification, analysis and reporting. Data are coded consistently across the country and regions can be compared, allowing the identification of

1  
2  
3 clusters and geographical disparities which may be a result of population demographics, social  
4  
5 determinants of health or local exposure.  
6  
7

## 8 **Ascertainment**

9

10  
11  
12 National prevalence in England for 2018-2020 is consistent with European surveillance data  
13  
14 for the same time period (excluding data for England) across most major congenital anomaly  
15  
16 groups (Figure 3). The prevalence of severe anomalies, such as severe congenital heart,  
17  
18 abdominal wall, oro-facial cleft, respiratory and genetic conditions was higher than the  
19  
20 European average. These anomaly subgroups include FASP-conditions and so are subject to  
21  
22 enhanced registration. Their higher prevalence reflects the integration of clinical audit in  
23  
24 NCARDRS and demonstrates the impact of clinical engagement on data quality and  
25  
26 ascertainment. The England national prevalence estimates for all cardiac conditions, limb  
27  
28 anomalies and congenital anomalies of the kidney and urinary tract (CAKUT) conditions are  
29  
30 lower than the average for other European registers. This likely reflects some under-  
31  
32 ascertainment of anomalies that are predominantly confirmed postnatally in regions of  
33  
34 NCARDRS new to reporting(10).  
35  
36

37  
38 Within England, there is some variation in the prevalence of different anomaly groups  
39  
40 depending on the length of time registration has been established, reflecting developing  
41  
42 ascertainment in regions new to congenital anomaly registration particularly for anomalies that  
43  
44 are more frequently identified postnatally or for those anomalies that are less severe(10, 21).  
45  
46 As registration becomes embedded and ascertainment increases, differences in prevalence  
47  
48 because of data collection should dissipate, revealing true regional differences, if they exist.  
49  
50

## 51 **Risk factor information**

52  
53

54  
55  
56 Information on the demographics of the mother is collected for each pregnancy and include  
57  
58 ethnicity, Body Mass Index, illnesses or medications, folic acid intake and other lifestyle factors  
59  
60

1  
2  
3 such as smoking. This information can be supplemented using data linkage to examine other  
4 factors, including social deprivation measured at the area-level through deprivation scores for  
5 mother's residential address at delivery,  
6  
7  
8  
9

## 10 Timeliness of data collection

11  
12  
13

14 Babies with a congenital anomaly are first registered by NCARDRS approximately 12 months  
15 after their expected date of delivery. This time lag allows for the notification of outcome of the  
16 pregnancy and a confirmatory diagnosis after delivery along with the notification of other  
17 relevant postnatal information and follow-up if required. Finalised delivery year cohorts are  
18 available approximately 18 months to two years following the end of a delivery year e.g.,  
19 babies delivered in 2021 would be reported on in early 2024. Recent advances in the  
20 automated processing of defined data feeds (e.g. fetal medicine software system extracts) aim  
21 to improve the timeliness of data by reducing the time lag.  
22  
23  
24  
25  
26  
27  
28  
29  
30  
31  
32  
33

## 34 FUTURE WORK

35  
36  
37

38 Planned improvements to the timeliness of data reporting and continued improvement to  
39 developing ascertainment for new regions and completeness of fields will further improve data  
40 quality. Proximity to the more established cancer registration service allows the register to  
41 build on synergies in data management, analytical infrastructure and data liaison.  
42  
43  
44  
45  
46

47 As the service matures, new data sources will be added to improve data quality or  
48 ascertainment. Transition to NHS England has situated NCARDRS closer to clinical providers  
49 and commissioning services which should improve data access and facilitate linkage to a  
50 wider network of data. Linkage with the Maternity Services Dataset, a routinely-collected  
51 national dataset describing maternity care in England(37), is underway and this aims to  
52 improve the completion of risk factor data items such as smoking, alcohol use as well as  
53 providing access to further information about the pregnancy. The inclusion of primary care  
54  
55  
56  
57  
58  
59  
60



1  
2  
3 data would be an obvious improvement to the ascertainment of postnatally-diagnosed  
4 conditions as would clinical audit data such as paediatric intensive care (PICANET), cardiac  
5 surgery (NICOR), maternal and neonatal deaths (MBRACE) and NHS England commissioned  
6 Highly Specialised Services data.  
7  
8  
9

10  
11  
12 Linkage to other datasets provides vital information on survival and health outcomes for these  
13 children throughout their life course. Cancer registration data collected by NDRS has been  
14 linked to the community prescriptions dataset(38) and linkage with the congenital anomaly  
15 registration data is in progress. This could provide information on possible drug interactions  
16 and potential teratogens. Linkage to other disease registers, subject to adequate consenting  
17 materials and approvals, is possible and could provide valuable information on health  
18 outcomes for children with congenital anomalies. NCARDRS currently contains data that only  
19 relates to the health outcomes of the child and further work should also include linkage to  
20 social and educational data.  
21  
22  
23  
24  
25  
26  
27  
28  
29  
30  
31  
32  
33  
34  
35

## 36 CONCLUSIONS

37  
38  
39  
40 If the thalidomide scandal of the 1960s prompted the establishment of congenital anomaly  
41 registration to understand the causes of congenital anomalies, the COVID-19 pandemic  
42 amplified the need to be able to identify and protect individuals living with conditions that may  
43 put them at increased risk compared to the general population. NCARDRS' congenital  
44 anomaly register collates information across the full patient pathway as the pregnancy  
45 progresses and the child grows. The value of this dataset in supporting clinical audits and  
46 evaluating service delivery is proven. This population-based national register – currently the  
47 largest data collection of its kind globally – has a critical role in supporting the epidemiology  
48 and monitoring of disease trends, investigating the causes of these conditions, evaluating the  
49  
50  
51  
52  
53  
54  
55  
56  
57  
58  
59  
60

1  
2  
3 outcome and providing this crucial information to parents, patients and clinicians and to clinical  
4  
5 and service commissioners so these children have what they need as they grow.  
6  
7  
8  
9

## 10 ACKNOWLEDGEMENTS

11  
12  
13  
14  
15 Thanks to the registration teams and associated functions in NDRS who register the data and  
16  
17 the notifiers across the NHS and other healthcare organisations who send NDRS data. This  
18  
19 work uses data that has been provided by patients, the NHS and other health care  
20  
21 organisations as part of patient care and support. The data are collated, maintained and quality  
22  
23 assured by the National Disease Registration Service, which is part of NHS England.  
24  
25

### 26 **Details of contributions**

27  
28 JMB led the drafting of the manuscript with advice from KMF, JB and SS as to the concept,  
29  
30 structure and content. Additional sections were drafted by BW, DG, CJ, SyS, NA and KR. BW  
31  
32 drafted the supplementary table (Table S1). KR, CJ, BW, DG, SyS provided advice on  
33  
34 registration and/or data management system practice. Data analysis was performed by JMB,  
35  
36 DM, GM and EO. All authors reviewed and commented on the manuscript and gave approval  
37  
38 for publication.  
39  
40  
41  
42  
43  
44

### 45 **Competing interests statement**

46  
47 No conflicts of interest have been declared.  
48  
49  
50  
51

### 52 **Funding**

53  
54 The authors report no direct funding for this work. The congenital anomaly register is curated  
55  
56 by NDRS on behalf of NHS England.  
57  
58  
59  
60

### Data availability statement

Permission to access congenital anomaly registration data can be granted to individuals who demonstrate that either there is a justified purpose for the data release, that there is an appropriate legal basis with safeguards in place to protect the data, or the data release is deemed to be anonymous (e.g. aggregate data). The access process for NDRS data is managed by Data Access Request Service (DARS) (<https://digital.nhs.uk/services/data-access-request-service-dars>) in NHS England. Full details, including data dictionaries, are available. Further details on the process of data access and associated costs are available on the DARS website [<https://digital.nhs.uk/services/data-access-request-service-dars>]. Data can also be made available by working in partnership with National Disease Registration Service and enquiries can be directed to [ndrs.enquiries@nhs.net](mailto:ndrs.enquiries@nhs.net).

### Collaboration statement

NDRS supports collaborations with academic and other institutions to use the data for a justified purpose. Enquiries, requests for statistical code used and anonymised data should be directed to [ndrs.enquiries@nhs.net](mailto:ndrs.enquiries@nhs.net).

## REFERENCES

1. Boyle B, Addor MC, Arriola L, Barisic I, Bianchi F, Csaky-Szunyogh M, et al. Estimating Global Burden of Disease due to congenital anomaly: an analysis of European data. Archives of disease in childhood Fetal and neonatal edition. 2018;103(1):F22-F8.
2. ONS. Child and infant mortality in England and Wales: 2020. Office for National Statistics; 2022.
3. World Health Organisation. Congenital disorders 2023 [Available from: [https://www.who.int/health-topics/congenital-anomalies#tab=tab\\_3](https://www.who.int/health-topics/congenital-anomalies#tab=tab_3)]
4. Dolk H. EUROCAT: 25 years of European surveillance of congenital anomalies. Archives of disease in childhood Fetal and neonatal edition. 2005;90(5):F355-8.

5. Henson KE, Elliss-Brookes L, Coupland VH, Payne E, Vernon S, Rous B, et al. Data Resource Profile: National Cancer Registration Dataset in England. *Int J Epidemiol.* 2020;49(1):16-h.
6. Department for Health. The UK Strategy for Rare diseases In: Health UDo, editor. 2013.
7. CMO. Annual Report of the Chief Medical Officer 2011: On the State of the Public's Health 2011.
8. Stevens S, Miller N, Rashbass J. Development and progress of the National Congenital Anomaly and Rare Disease Registration Service. *Arch Dis Child.* 2018;103(3):215-7.
9. Boyd P, Armstrong B, H D, Botting B, Pattenden S, Abramsky L, et al. Congenital anomaly surveillance in England—ascertainment deficiencies in the national system. *British Medical Journal.* 2004;330:27
10. NCARDRS. National Congenital Anomaly and Rare Disease Registration Service Congenital Anomaly Statistics Report 2018. UK Government: Public Health England; 2020. Report No.: PHE publications gateway number: GW-1445.
11. EUROCAT. EUROCAT Guide 1.4: Instruction for the registration of congenital anomalies. University of Ulster; 2013 Last update version 15/11/2019.
12. EUROCAT. [https://eu-rd-platform.jrc.ec.europa.eu/eurocat/eurocat-data/prevalence\\_en](https://eu-rd-platform.jrc.ec.europa.eu/eurocat/eurocat-data/prevalence_en) 2021 [
13. NCARDRS. National Congenital Anomaly and Rare Disease Registration Service Congenital Anomaly Statistics Report 2020. NHS Digital; 2022.
14. World Health Organization. ICD-10: International Statistical Classification of Diseases and Related Health Problems. Geneva: World Health Organization; 2010.
15. Herbert A, Wijlaars L, Zylbersztejn A, Cromwell D, Hardelid P. Data Resource Profile: Hospital Episode Statistics Admitted Patient Care (HES APC). *Int J Epidemiol.* 2017;46(4):1093-i.
16. Loane M, Dolk H, Garne E, Greenlees R, Group aEW. EUROCAT Data Quality Indicators for Population-Based Registries for Congenital Anomalies. *Birth Defects Research.* 2011;91:S23-S30.
17. DHSC. National Disease Registries Directions 2021. In: Care DoHS, editor. London, UK2021.
18. NCARDRS. National Congenital Anomaly and Rare Disease Registration Service Congenital Anomaly Statistics Report 2015. UK Government: Public Health England; 2017. Report No.: PHE publications gateway number: GW-1445.
19. NCARDRS. National Congenital Anomaly and Rare Disease Registration Service Congenital Anomaly Statistics Report 2016. UK Government: Public Health England; 2018. Report No.: PHE publications gateway number: GW-1445.
20. NCARDRS. National Congenital Anomaly and Rare Disease Registration Service Congenital Anomaly Statistics Report 2017. UK Government: Public Health England; 2019. Report No.: PHE publications gateway number: GW-1445.
21. NCARDRS. National Congenital Anomaly and Rare Disease Registration Service Congenital Anomaly Statistics Report 2019. UK Government: Public Health England; 2021. Report No.: PHE publications gateway number: GOV-9201.
22. Loane M, Dolk H, Kelly A, Teljeur C, Greenlees R, Densem J, et al. Paper 4: EUROCAT statistical monitoring: identification and investigation of ten year trends of congenital anomalies in Europe. *Birth defects research Part A, Clinical and molecular teratology.* 2011;91 Suppl 1:S31-43.
23. Aldridge N, Pandya P, Rankin J, Miller N, Broughan J, Permilloo N, et al. Detection rates of a national fetal anomaly screening programme: A national cohort study. *BJOG.* 2022.
24. Public Health England. Screening for Down's syndrome, Edwards' syndrome and Patau's syndrome: NIPT 2021.
25. NHS Digital. Shielded Patient List 2020 [Available from: <https://digital.nhs.uk/coronavirus/shielded-patient-list>.
26. Immunisation and Vaccine-Preventable Diseases Division. Protocol for the national surveillance and safety analysis of coronavirus (COVID-19) vaccination in pregnancy. Published 25 November 2021: UK Health Security Agency; 2021.

- 1  
2  
3 27. Santoro M, Coi A, Barisic I, Garne E, Addor MC, Bergman JEH, et al. Epidemiology of Dandy-  
4 Walker Malformation in Europe: A EUROCAT Population-Based Registry Study. *Neuroepidemiology*.  
5 2019;53(3-4):169-79.  
6  
7 28. van de Putte R, van Rooij I, Haanappel CP, Marcelis CLM, Brunner HG, Addor MC, et al.  
8 Maternal risk factors for the VACTERL association: A EUROCAT case-control study. *Birth Defects Res*.  
9 2020;112(9):688-98.  
10 29. van de Putte R, van Rooij I, Marcelis CLM, Guo M, Brunner HG, Addor MC, et al. Spectrum of  
11 congenital anomalies among VACTERL cases: a EUROCAT population-based study. *Pediatr Res*.  
12 2020;87(3):541-9.  
13 30. Morris JK, Addor MC, Ballardini E, Barisic I, Barrachina-Bonet L, Braz P, et al. Prevention of  
14 Neural Tube Defects in Europe: A Public Health Failure. *Front Pediatr*. 2021;9:647038.  
15 31. Coi A, Barisic I, Garne E, Pierini A, Addor MC, Aizpurua Atxega A, et al. Epidemiology of  
16 aplasia cutis congenita: A population-based study in Europe. *J Eur Acad Dermatol Venereol*.  
17 2023;37(3):581-9.  
18 32. Coi A, Santoro M, Garne E, Pierini A, Addor MC, Alessandri JL, et al. Epidemiology of  
19 achondroplasia: A population-based study in Europe. *Am J Med Genet A*. 2019;179(9):1791-8.  
20 33. Morris JK, Wellesley D, Limb E, Bergman JEH, Kinsner-Ovaskainen A, Addor MC, et al.  
21 Prevalence of vascular disruption anomalies and association with young maternal age: A EUROCAT  
22 study to compare the United Kingdom with other European countries. *Birth Defects Res*.  
23 2022;114(20):1417-26.  
24 34. Folic acid added to flour to prevent spinal conditions in babies. [press release]. 20  
25 September 2021 2021.  
26 35. Broughan J, Martin D, Higgins T, Swan G, Cullum A, Kurinczuk J, et al. Prevalence of neural  
27 tube defects in England prior to the mandatory fortification of non-wholemeal wheat flour with folic  
28 acid: a population-based cohort study. *Archives of Disease in Childhood*. 2023.  
29 36. EUROCAT. Coverage of the European live births, Birth year 2015, by EUROCAT full or  
30 associate member registries (January 2020). 2020.  
31 37. MSDS. Maternity Services Dataset [https://digital.nhs.uk/data-and-information/data-](https://digital.nhs.uk/data-and-information/data-collections-and-data-sets/data-sets/maternity-services-data-set)  
32 [collections-and-data-sets/data-sets/maternity-services-data-set](https://digital.nhs.uk/data-and-information/data-collections-and-data-sets/data-sets/maternity-services-data-set).  
33  
34 38. Henson KE, Brock R, Shand B, Coupland VH, Elliss-Brookes L, Lyratzopoulos G, et al. Cohort  
35 profile: prescriptions dispensed in the community linked to the national cancer registry in England.  
36 *BMJ open*. 2018;8(7):e020980.  
37  
38  
39  
40  
41  
42  
43  
44  
45  
46  
47  
48  
49  
50  
51  
52  
53  
54  
55  
56  
57  
58  
59  
60

1  
2  
3 Figure 1 The regional structure of NCARDRS and the proportion of the birth population of  
4 England that was covered by congenital anomaly registration.  
5  
6  
7

8 Figure 2 : Schematic describing the multisource registration process used for congenital  
9 anomalies in England.  
10  
11  
12

13 Figure 3 The prevalence of anomaly groups in England compared to EUROCAT registers  
14 excluding English registers (2018-2020) [data downloaded 24<sup>th</sup> April 2023 from EUROCAT,  
15  
16  
17  
18  
19  
20  
21  
22  
23  
24  
25  
26  
27  
28  
29  
30  
31  
32  
33  
34  
35  
36  
37  
38  
39  
40  
41  
42  
43  
44  
45  
46  
47  
48  
49  
50  
51  
52  
53  
54  
55  
56  
57  
58  
59  
60  
1<sup>st</sup> August 2022 NCARDRS]

peer review only

Table 1: Summary of key data items currently available for each congenital anomaly registration in the NCARDRS congenital anomaly dataset. Data are available for all years.

| <b>Mother</b>                   | <b>Pregnancy</b>                                             | <b>Baby</b>                              | <b>Anomaly</b>                                | <b>Test<sup>[1]</sup> <sup>[3]</sup></b> |
|---------------------------------|--------------------------------------------------------------|------------------------------------------|-----------------------------------------------|------------------------------------------|
| Patient identifier              | Pregnancy identifier                                         | Patient identifier                       | Anomaly identifier                            | Test date                                |
| NHS number                      | Expected Delivery Date                                       | NHS number                               | Confirmation Status of anomaly <sup>[2]</sup> | Test type                                |
| Date of birth                   | Pregnancy outcome                                            | Sex                                      | ICD 10 & BPA extension code                   | Test result(s)                           |
| Ethnicity                       | Delivery information                                         | Date of birth                            | Description of the anomaly                    | Test provider                            |
| Country of birth                | Screening details <sup>[3]</sup>                             | Gestational length at delivery           | Gestation first suspected                     | Test requestor                           |
| Vital status                    | Body Mass Index                                              | Birth weight (g)                         | Gestation at confirmation                     | Ultrasound markers                       |
| Previous births and pregnancies | Smoking status at booking, alcohol and substance use         | Birth order if from a multiple pregnancy | Diagnostic method                             | Indication                               |
|                                 | Maternal illness status                                      | Method of delivery                       | Aetiology of the anomaly/ies                  |                                          |
|                                 | Folic acid intake                                            | Surgical status                          |                                               |                                          |
|                                 | Assisted conception status                                   | Date of death                            |                                               |                                          |
|                                 | Number of fetuses                                            | Postmortem status                        |                                               |                                          |
|                                 | Consanguinity                                                |                                          |                                               |                                          |
|                                 | Deprivation (derived from postcode of residence at delivery) |                                          |                                               |                                          |
|                                 | Postcode at booking and at delivery                          |                                          |                                               |                                          |

[1] Test information is only consistently registered for conditions with enhanced registration (ie those conditions within the FASP audit)

[2] Confirmation status: Anomalies are registered according to varying degrees of certainty depending on the clinical evidence available (*confirmed, probable or suspected*). Anomalies remain at the level of *suspected* until the evidence supporting the diagnosis of the anomaly attains agreed confirmation criteria

[3] Some fields may require additional Research Ethics Committee or other approvals on request

Table 2 The number of pregnancies, babies and anomalies recorded registered since NCARDRS has been in operation until 2020 Data extracted 13th June 2023.

|                                                                                                      | <b>2015</b> | <b>2016</b> | <b>2017</b> | <b>2018</b> | <b>2019</b> | <b>2020</b> |
|------------------------------------------------------------------------------------------------------|-------------|-------------|-------------|-------------|-------------|-------------|
| Number of regions reporting                                                                          | 4           | 7           | 7           | 10          | 10          | 10          |
| Number of pregnancies with babies with a congenital anomaly of any status                            | 2,915       | 9,524       | 9,882       | 20,036      | 19,636      | 18,440      |
| Number of babies with a congenital anomaly of any status                                             | 2,932       | 9,574       | 9,937       | 20,145      | 19,767      | 18,541      |
| Number of mothers                                                                                    | 2,908       | 9,506       | 9,868       | 20,007      | 19,611      | 18,416      |
| Total number of anomalies                                                                            | 5,902       | 18,839      | 18,803      | 35,483      | 34,500      | 33,344      |
| Total number of confirmed and probable anomalies                                                     | 5,432       | 15,819      | 15,316      | 28,282      | 25,988      | 25,617      |
| Number of live and still births in regions with active congenital anomaly registration (denominator) | 141,474     | 329,301     | 320,013     | 628,171     | 614,952     | 589,454     |

NOTE : the numbers may differ from published estimates at point of reporting because of continued accumulation of data

Birth population calculated using ONS row level birth information available via the UKHSA DataLake.



1  
2  
3  
4  
5  
6  
7  
8  
9  
10  
11  
12  
13  
14  
15  
16  
17  
18  
19  
20  
21  
22  
23  
24  
25  
26  
27  
28  
29  
30  
31  
32  
33  
34  
35  
36  
37  
38  
39  
40  
41  
42  
43  
44  
45  
46  
47  
48  
49  
50  
51  
52  
53  
54  
55  
56  
57  
58  
59  
60

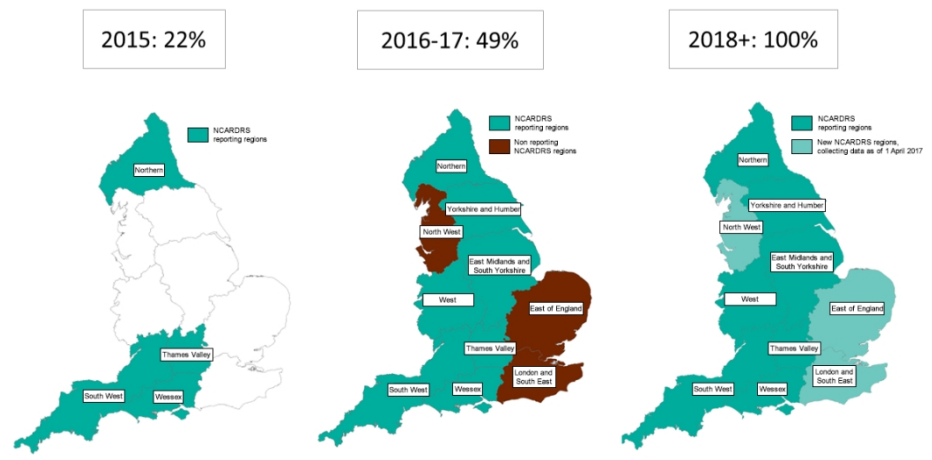

Figure 1 The regional structure of NCARDRS and the proportion of the birth population of England that was covered by congenital anomaly registration.

855x481mm (38 x 38 DPI)



Figure 2 : Schematic describing the multisource registration process used for congenital anomalies in England.

855x481mm (38 x 38 DPI)



Figure 3 The prevalence of anomaly groups in England compared to EUROCAT registers excluding English registers (2018-2020) [data downloaded 24th April 2023 from EUROCAT, 1st August 2022 NCARDS]

466x338mm (38 x 38 DPI)

**Table S1** NCARDS inclusion and exclusion criteria for registerable congenital anomalies

| Anomaly type*            | Routine inclusion (per ICD-10 code blocks)                | Inclusions subject to criteria                                                                                                                                                                                               | Exclusions                                                                                                                                                                                                                                                                                         | Differences with EUROCAT                                                                                                                                                            | Enhanced registration                                                                        |
|--------------------------|-----------------------------------------------------------|------------------------------------------------------------------------------------------------------------------------------------------------------------------------------------------------------------------------------|----------------------------------------------------------------------------------------------------------------------------------------------------------------------------------------------------------------------------------------------------------------------------------------------------|-------------------------------------------------------------------------------------------------------------------------------------------------------------------------------------|----------------------------------------------------------------------------------------------|
| Nervous system anomalies | Q00-Q07<br>Congenital malformations of the nervous system | MEASUREMENT / SEVERITY<br>Q02 Microcephaly<br>Q03.8 (part) Congenital ventriculomegaly [of lateral ventricle(s)]<br>Q04.32 Reduction anomalies of cerebellum<br><br>CLINICAL SIGNIFICANCE<br>Q04.61 (part)<br>Arachnoid cyst | EXCLUDE IN ISOLATION<br>Q0780 Jaw-winking syndrome<br>Q0782 Crocodile tears<br><br>EXCLUDE always<br>Q04.6 (part) Porencephaly                                                                                                                                                                     | Q04.6 (part) Porencephaly - EUROCAT inclusion but NCARDS excludes<br><br>Q04.61 Single congenital cerebral cyst - EUROCAT exclusion in isolation but NCARDS includes Arachnoid cyst | YES<br>Q00* Anencephaly and similar malformations<br>Q01* Encephalocele<br>Q05* Spina bifida |
| Eye anomalies            | Q10-Q15<br>Congenital malformations of eye                | NA                                                                                                                                                                                                                           | EXCLUDE IN ISOLATION<br>Q10.1 Congenital ectropion,<br>Q10.2 Congenital entropion,<br>Q10.3 Other congenital malformations of eyelid, Q10.5 Congenital stenosis or stricture of lacrimal duct<br>Q13.2 (part) Anisocoria, congenital, Q13.5 Blue sclera<br>Minor anomalies and dysmorphic features | NA                                                                                                                                                                                  | NO                                                                                           |

| Anomaly type*                | Routine inclusion (per ICD-10 code blocks)                        | Inclusions subject to criteria                 | Exclusions                                                                                                                                                                                                                                                                                          | Differences with EUROCAT | Enhanced registration |
|------------------------------|-------------------------------------------------------------------|------------------------------------------------|-----------------------------------------------------------------------------------------------------------------------------------------------------------------------------------------------------------------------------------------------------------------------------------------------------|--------------------------|-----------------------|
| Ear, face and neck anomalies | Q16 Congenital malformations of ear causing impairment of hearing | CLINICAL SIGNIFICANCE<br>Q18.3 Webbing of neck | EXCLUDE IN ISOLATION<br>Q17* Other congenital malformations of ear Q18.0-Q18.2<br>Branchial cleft malformations, Q18.4-Q18.9 Macrostomia, Microstomia, Macrocheilia, Microcheilia, Other congenital malformations of face and neck, Dysmorphic features NOS Minor anomalies and dysmorphic features | NA                       | NO                    |

For peer review only

1  
2  
3  
4  
5  
6  
7  
8  
9  
10  
11  
12  
13  
14  
15  
16  
17  
18  
19  
20  
21  
22  
23  
24  
25  
26  
27  
28  
29  
30  
31  
32  
33  
34  
35  
36  
37  
38  
39  
40  
41  
42  
43  
44  
45  
46

| Anomaly type*                          | Routine inclusion (per ICD-10 code blocks)                | Inclusions subject to criteria                                                                                                                                                                                                                                                                                                                                                                              | Exclusions                                                                                                                                                                                                                                                                                                                                          | Differences with EUROCAT | Enhanced registration                                                                                                                                                                                                                                                                                                                                                                                                                                                                                                                                                                                                                                                                                                                                                    |
|----------------------------------------|-----------------------------------------------------------|-------------------------------------------------------------------------------------------------------------------------------------------------------------------------------------------------------------------------------------------------------------------------------------------------------------------------------------------------------------------------------------------------------------|-----------------------------------------------------------------------------------------------------------------------------------------------------------------------------------------------------------------------------------------------------------------------------------------------------------------------------------------------------|--------------------------|--------------------------------------------------------------------------------------------------------------------------------------------------------------------------------------------------------------------------------------------------------------------------------------------------------------------------------------------------------------------------------------------------------------------------------------------------------------------------------------------------------------------------------------------------------------------------------------------------------------------------------------------------------------------------------------------------------------------------------------------------------------------------|
| Heart and circulatory system anomalies | Q20-Q28<br>Congenital malformations of circulatory system | <p>PERSISTENCE</p> <p>Q21.10 Ostium secundum atrial septal defect (type II)</p> <p>CLINICAL SIGNIFICANCE</p> <p>Q24.8 Other specified congenital malformations of heart</p> <p>Q28.8 Other specified congenital malformations of circulatory system</p> <p>GESTATIONAL AGE AT DELIVERY &amp; PERSISTENCE / SURGERY / SEVERITY</p> <p>Q25.0 Patent ductus arteriosus, Q25.6 Stenosis of pulmonary artery</p> | <p>EXCLUDE IN ISOLATION</p> <p>Q21.11 Patent foramen ovale</p> <p>Q24.6 Congenital heart block</p> <p>Q25.41 Persistent right aortic arch</p> <p>Q26.1 Persistent left superior vena cava,</p> <p>Q26.8 (part) Absence of superior vena cava, Interrupted inferior vena cava</p> <p>Q27.0 Congenital absence and hypoplasia of umbilical artery</p> | NA                       | <p>YES</p> <p>SERIOUS CARDIAC ANOMALIES</p> <p>Q20.0 Common arterial trunk</p> <p>Q20.1 Double outlet right ventricle</p> <p>Q20.3 Transposition of the great arteries</p> <p>Q20.4 Double inlet ventricle</p> <p>Q21.2* Atrioventricular septal defect</p> <p>Q21.3, Q21.82 Tetralogy of Fallot</p> <p>Q22.0 Pulmonary valve atresia</p> <p>Q22.4 Congenital tricuspid stenosis</p> <p>Q22.5 Ebstein's anomaly</p> <p>Q22.6 Hypoplastic right heart syndrome</p> <p>Q23.0 Congenital stenosis of aortic valve</p> <p>Q23.2, Q23.3 Congenital mitral stenosis and insufficiency</p> <p>Q23.4 Hypoplastic left heart</p> <p>Q25.1* Coarctation of aorta</p> <p>Q25.2 Aortic atresia, interrupted aortic arch</p> <p>Q26.2 Total anomalous pulmonary venous connection</p> |

1  
2  
3  
4  
5  
6  
7  
8  
9  
10  
11  
12  
13  
14  
15  
16  
17  
18  
19  
20  
21  
22  
23  
24  
25  
26  
27  
28  
29  
30  
31  
32  
33  
34  
35  
36  
37  
38  
39  
40  
41  
42  
43  
44  
45  
46

| Anomaly type*                | Routine inclusion (per ICD-10 code blocks)                            | Inclusions subject to criteria                                                                                               | Exclusions                                                                                                                                                                                            | Differences with EUROCAT | Enhanced registration                                 |
|------------------------------|-----------------------------------------------------------------------|------------------------------------------------------------------------------------------------------------------------------|-------------------------------------------------------------------------------------------------------------------------------------------------------------------------------------------------------|--------------------------|-------------------------------------------------------|
| Respiratory system anomalies | Q30-Q34<br>Congenital malformations of respiratory system             | CLINICAL SIGNIFICANCE<br>Q30.8 Other congenital malformations of nose<br><br>CAUSE<br>Q33.6 Hypoplasia and dysplasia of lung | EXCLUDE IN ISOLATION<br>Q31.5 Congenital laryngomalacia<br>Q32.0 Congenital tracheomalacia<br>Q32.2* Congenital bronchomalacia<br>Q33.00 Congenital single lung cyst<br>Q33.1* Accessory lobe of lung | NA                       | NO                                                    |
| Orofacial clefts             | Q35-Q37 Cleft lip and cleft palate                                    | MINOR FORMS<br>Q35-Q37 Cleft lip and cleft palate                                                                            | EXCLUDE IN ISOLATION<br>Q35.7 Cleft uvula                                                                                                                                                             | NA                       | YES<br>Q36*, Q37* Cleft lip with/without cleft palate |
| Abdominal wall               | Q79.2 Exomphalos<br>Q79.3<br>Gastroschisis<br>Q79.5 Body Wall complex |                                                                                                                              |                                                                                                                                                                                                       | NA                       | YES<br>Q79.2 Exomphalos<br>Q79.3 Gastroschisis        |

| Anomaly type*              | Routine inclusion (per ICD-10 code blocks)                                                             | Inclusions subject to criteria                                                                                                                                                                                                                                             | Exclusions                                                                                                                                                                                                                                                                                                                                                                                                                                                                                                            | Differences with EUROCAT | Enhanced registration                         |
|----------------------------|--------------------------------------------------------------------------------------------------------|----------------------------------------------------------------------------------------------------------------------------------------------------------------------------------------------------------------------------------------------------------------------------|-----------------------------------------------------------------------------------------------------------------------------------------------------------------------------------------------------------------------------------------------------------------------------------------------------------------------------------------------------------------------------------------------------------------------------------------------------------------------------------------------------------------------|--------------------------|-----------------------------------------------|
| Gastrointestinal anomalies | Q38-Q45 Other congenital malformations of the digestive system; Q79.0* Congenital diaphragmatic hernia | <p>CLINICAL SIGNIFICANCE</p> <p>Q38.3 Other congenital malformations of tongue</p> <p>Q44.5 Other congenital malformations of bile ducts</p> <p>GESTATIONAL AGE AT DIAGNOSIS &amp; SURGERY</p> <p>Q43.30 Malrotation of colon</p> <p>SURGERY</p> <p>Q43.5 Ectopic anus</p> | <p>EXCLUDE IN ISOLATION</p> <p>Q38.1 Ankyloglossia, Q38.2 Macroglossia, Q38.3 (part) Microglossia, Q38.4 (part) Congenital ranula, Q38.50 High arched palate</p> <p>Q40.0 Congenital hypertrophic pyloric stenosis, Q40.1 Congenital hiatus hernia, Q40.21 Dysmotility of stomach</p> <p>Q43.0* Meckel's diverticulum, Q43.20 Large intestinal dysmotility, Q43.81 Small intestinal dysmotility, Q43.82 Generalised intestinal dysmotility</p> <p>Q44.4 Choledochal cyst</p> <p>Q45.83 Congenital mesenteric cyst</p> | NA                       | YES<br>Q79.0* Congenital diaphragmatic hernia |



1  
2  
3  
4  
5  
6  
7  
8  
9  
10  
11  
12  
13  
14  
15  
16  
17  
18  
19  
20  
21  
22  
23  
24  
25  
26  
27  
28  
29  
30  
31  
32  
33  
34  
35  
36  
37  
38  
39  
40  
41  
42  
43  
44  
45  
46

| Anomaly type*                                        | Routine inclusion (per ICD-10 code blocks)                                     | Inclusions subject to criteria                                                                                                                     | Exclusions                                                                                                                                                                                                                                                                                                                                                                                                                         | Differences with EUROCAT                                                                            | Enhanced registration                 |
|------------------------------------------------------|--------------------------------------------------------------------------------|----------------------------------------------------------------------------------------------------------------------------------------------------|------------------------------------------------------------------------------------------------------------------------------------------------------------------------------------------------------------------------------------------------------------------------------------------------------------------------------------------------------------------------------------------------------------------------------------|-----------------------------------------------------------------------------------------------------|---------------------------------------|
| Reproductive system anomalies                        | Q50-Q56<br>Congenital malformations of genital organs                          | CLINICAL SIGNIFICANCE<br>Q55.6 Other congenital malformations of penis                                                                             | EXCLUDE IN ISOLATION<br>Q50.1* Developmental ovarian cyst, Q50.2 Congenital torsion of ovary, Q50.5 Embryonic cyst of broad ligament, Q52.3 Imperforate hymen, Q52.4 (part) Congenital hypertrophy of hymen, Q52.5 Fusion of labia<br>Q52.7 (part) Minor other congenital malformations of vulva<br>Q54.4 Congenital chordee<br>Q55.20 Retractable testis, Q55.21 Bifid scrotum<br><br>EXCLUDE always<br>Q53* Undescended testicle | Q52.7 (part)<br>Congenital rectovulval fistula - EUROCAT exclusion in isolation but NCARDS includes | NO                                    |
| Congenital anomalies of the kidney and urinary tract | Q60-Q64<br>Congenital malformations of the urinary system;<br>Q794 Prune Belly | MEASUREMENT / SEVERITY<br>Q62.0 Congenital hydronephrosis<br><br>CLINICAL SIGNIFICANCE<br>Q63.8 Other specified congenital malformations of kidney | EXCLUDE IN ISOLATION<br>Q61.0 Congenital single renal cyst<br>Q62.7* Congenital vesico-uretero-renal reflux<br>Q63.3 Hyperplastic and giant kidney                                                                                                                                                                                                                                                                                 | NA                                                                                                  | YES<br>Q60.1 Bilateral renal agenesis |

| Anomaly type*                                        | Routine inclusion (per ICD-10 code blocks)        | Inclusions subject to criteria                                                                                                                                                                                                            | Exclusions                                                                                                                                                                                                                                                                                                                                                                                                                                    | Differences with EUROCAT                                                                | Enhanced registration |
|------------------------------------------------------|---------------------------------------------------|-------------------------------------------------------------------------------------------------------------------------------------------------------------------------------------------------------------------------------------------|-----------------------------------------------------------------------------------------------------------------------------------------------------------------------------------------------------------------------------------------------------------------------------------------------------------------------------------------------------------------------------------------------------------------------------------------------|-----------------------------------------------------------------------------------------|-----------------------|
| Congenital deformities of the musculoskeletal system | Q65-Q68<br>Congenital musculoskeletal deformities | <p>PERSISTENCE<br/>Q65.80 &amp; Q65.81<br/>Dysplastic hip</p> <p>CAUSE<br/>Q68.8 (part)<br/>Arthrogryposis, not otherwise specified</p>                                                                                                   | <p>EXCLUDE IN ISOLATION<br/>Q65.3-Q65.5 Congenital subluxation of hip, Q65.6*<br/>Unstable hip<br/>Q66.1-Q66.9 Congenital deformities of feet (except include talipes equinovarus)<br/>Q67* Congenital musculoskeletal deformities of head, face, spine and chest<br/>Q68.0 Congenital deformity of sternocleidomastoid muscle, Q68.10 Clinodactyly, Q68.21 Genu recurvatum, Q68.3-Q68.5<br/>Congenital bowing of femur, tibia and fibula</p> | Q65.80 & Q65.81<br>Dysplastic hip - EUROCAT exclusion in isolation but NCARDRS includes | NO                    |
| Congenital malformations of the limbs                | Q69-Q74<br>Congenital malformations of limb(s)    | <p>CLINICAL SIGNIFICANCE<br/>Q70.2 Fused toes<br/>Q703 Webbed toes,<br/>Q70.9 Syndactyly, unspecified<br/>Q74.2 Other congenital malformations of lower limb(s), including pelvic girdle<br/>Q74.82 Congenital undergrowth of limb(s)</p> | <p>EXCLUDE IN ISOLATION<br/>Q74.0 (part) Congenital cubitus valgus, Q74.00 Accessory carpal bone</p>                                                                                                                                                                                                                                                                                                                                          | NA                                                                                      | NO                    |

1  
2  
3  
4  
5  
6  
7  
8  
9  
10  
11  
12  
13  
14  
15  
16  
17  
18  
19  
20  
21  
22  
23  
24  
25  
26  
27  
28  
29  
30  
31  
32  
33  
34  
35  
36  
37  
38  
39  
40  
41  
42  
43  
44  
45  
46

| Anomaly type*                                                         | Routine inclusion (per ICD-10 code blocks)                       | Inclusions subject to criteria                                                                                                                                                                                                                                                                                                                                                                 | Exclusions                                                                                                                                                                                                                                                                                                               | Differences with EUROCAT | Enhanced registration                                                                                                      |
|-----------------------------------------------------------------------|------------------------------------------------------------------|------------------------------------------------------------------------------------------------------------------------------------------------------------------------------------------------------------------------------------------------------------------------------------------------------------------------------------------------------------------------------------------------|--------------------------------------------------------------------------------------------------------------------------------------------------------------------------------------------------------------------------------------------------------------------------------------------------------------------------|--------------------------|----------------------------------------------------------------------------------------------------------------------------|
| Congenital malformations of other parts of the musculoskeletal system | Q75-Q79 Other congenital malformations of musculoskeletal system | CAUSE<br>Q75.02 Trigenocephaly<br><br>CLINICAL SIGNIFICANCE<br>Q75.8* Other specified congenital malformations of skull and face bones<br>Q76.4 Other congenital malformations of spine, not associated with scoliosis<br><br>GESTATIONAL AGE AT DIAGNOSIS<br>Q79.5 (part) Congenital abdominal wall defect not otherwise specified<br><br>CONSEQUENCE<br>Q79.80 Congenital constriction bands | EXCLUDE IN ISOLATION<br>Q75.00 (part) Brachycephaly, Q75.2 Hypertelorism, Q75.3* Macrocephaly<br>Q76.0 Spina bifida occulta, Q76.43 Congenital lordosis, postural, Q76.5 Cervical rib, Q76.60 Congenital absence of rib, Q76.62 Accessory rib, Q76.71 Sternum bifidum<br>Q79.5 (part) - Congenital divarication of recti | NA                       | YES<br>Q77*/Q78* (part) Lethal and severe skeletal dysplasias e.g. Thanatophoric dysplasia, Short rib-polydactyly syndrome |

| Anomaly type*                          | Routine inclusion (per ICD-10 code blocks)        | Inclusions subject to criteria | Exclusions                                                                                                                                                                                                                                                                                                                    | Differences with EUROCAT | Enhanced registration |
|----------------------------------------|---------------------------------------------------|--------------------------------|-------------------------------------------------------------------------------------------------------------------------------------------------------------------------------------------------------------------------------------------------------------------------------------------------------------------------------|--------------------------|-----------------------|
| Integument anomalies                   | Q80-Q84<br>Congenital malformations of integument | NA                             | EXCLUDE IN ISOLATION<br>Q82.5* Congenital non-neoplastic naevus, Q82.8 (part)<br>Dermatoglyphic anomalies, Q82.80 Abnormal palmar creases, Q82.81 Accessory skin tags<br>Q83.3 Accessory nipple<br>Q84.2 (part) Persistent lanugo, Q84.5 (part) Enlarged or hypertrophic nails, Q84.6 Other congenital malformations of nails | NA                       | NO                    |
| Phakomatoses, not elsewhere classified | Q85<br>Phakomatoses, not elsewhere classified     | NA                             | NA                                                                                                                                                                                                                                                                                                                            | NA                       | NO                    |

| Anomaly type*                           | Routine inclusion (per ICD-10 code blocks)                                                     | Inclusions subject to criteria                                                                                                                                                                                                               | Exclusions                                                                  | Differences with EUROCAT | Enhanced registration |
|-----------------------------------------|------------------------------------------------------------------------------------------------|----------------------------------------------------------------------------------------------------------------------------------------------------------------------------------------------------------------------------------------------|-----------------------------------------------------------------------------|--------------------------|-----------------------|
| Teratogenic syndromes                   | Q86* Congenital malformation syndromes due to known exogenous causes, not elsewhere classified | MATERNAL HISTORY & CONSEQUENCE<br>Q86.0 Fetal alcohol syndrome<br><br>KNOWN AETIOLOGY & CONSEQUENCE<br>Q86.1-Q86.8* Fetal hydantoin syndrome, Fetal warfarin syndrome, Other congenital malformation syndromes due to known exogenous causes | NA                                                                          | NA                       | NO                    |
| Other congenital malformation syndromes | Q87* Other specified congenital malformation syndromes (multiple systems)                      | NA                                                                                                                                                                                                                                           | EXCLUDE IN ISOLATION<br>Q87.4 (part) Arachnodactyly not otherwise specified | NA                       | NO                    |
| Other anomalies                         | Q89* Other congenital malformations, not elsewhere classified                                  | NA                                                                                                                                                                                                                                           | EXCLUDE IN ISOLATION<br>Q89.9 Congenital malformation, unspecified          | NA                       | NO                    |

| Anomaly type*        | Routine inclusion (per ICD-10 code blocks)                                                                                                                                                                          | Inclusions subject to criteria                                                                          | Exclusions                                                                                                                                                                                                                                | Differences with EUROCAT                                                                                                                                                                                                    | Enhanced registration                                                      |
|----------------------|---------------------------------------------------------------------------------------------------------------------------------------------------------------------------------------------------------------------|---------------------------------------------------------------------------------------------------------|-------------------------------------------------------------------------------------------------------------------------------------------------------------------------------------------------------------------------------------------|-----------------------------------------------------------------------------------------------------------------------------------------------------------------------------------------------------------------------------|----------------------------------------------------------------------------|
| Chromosomal          | Q90-Q99<br>Chromosomal                                                                                                                                                                                              | IF REGISTRABLE ANOMALY<br>Q95* Balanced rearrangements and structural markers, not elsewhere classified | EXCLUDE always<br>Q95.0 Balanced translocation and insertion in normal individual,<br>Q95.1 Chromosome inversion in normal individual, Q95.4<br>Individuals with marker heterochromatin, Q95.5<br>Individuals with autosomal fragile site | NA                                                                                                                                                                                                                          | YES<br>Q90* Down's syndrome<br>Q91* Edwards' syndrome and Patau's syndrome |
| Congenital neoplasms | D15.1 Cardiac rhabdomyoma<br>D18.10 Cystic hygroma (congenital)<br>D21.5 Sacrococcygeal teratoma, Sacral teratoma<br>D21.9 Rhabdomyoma of other organs [i.e. not heart]<br>D48.7 Teratoma, not elsewhere classified | CLINICAL SIGNIFICANCE<br>D18.0 Haemangioma, any site, D18.1 Lymphangioma, any site                      | NA                                                                                                                                                                                                                                        | EUROCAT exclusion but NCARDS includes<br>D15.1 Cardiac rhabdomyoma, D18.0 Haemangioma, any site, D18.1 Lymphangioma, any site, D21.9 Rhabdomyoma of other organs [i.e. not heart], D48.7 Teratoma, not elsewhere classified | NO                                                                         |
| Di George syndrome   | D82.1 Di George syndrome                                                                                                                                                                                            | NA                                                                                                      | NA                                                                                                                                                                                                                                        | NA                                                                                                                                                                                                                          | NO                                                                         |

| Anomaly type*                       | Routine inclusion (per ICD-10 code blocks)                          | Inclusions subject to criteria                                                                                                                                 | Exclusions                                                                            | Differences with EUROCAT              | Enhanced registration |
|-------------------------------------|---------------------------------------------------------------------|----------------------------------------------------------------------------------------------------------------------------------------------------------------|---------------------------------------------------------------------------------------|---------------------------------------|-----------------------|
| Waardenburg syndrome                | E70.30 Waardenburg syndrome                                         | NA                                                                                                                                                             | NA                                                                                    | NA                                    | NO                    |
| Cystic fibrosis                     | E84* Cystic fibrosis                                                | NA                                                                                                                                                             | NA                                                                                    | EUROCAT exclusion but NCARDS includes | NO                    |
| Spinal muscular atrophy             | G12* Spinal muscular atrophy and related syndromes                  | NA                                                                                                                                                             | NA                                                                                    | EUROCAT exclusion but NCARDS includes | NO                    |
| Congenital chylothorax              | NA                                                                  | NA                                                                                                                                                             | EXCLUDE IN ISOLATION<br>I89.8 Chylothorax (lymphatic);<br>J94.0 Chylothorax (chylous) | NA                                    | NO                    |
| Paralysis of vocal cords and larynx | NA                                                                  | NA                                                                                                                                                             | EXCLUDE IN ISOLATION<br>J38.0 Paralysis of vocal cords and larynx                     | NA                                    | NO                    |
| Micrognathia                        |                                                                     | SEVERITY<br>K07.0 Micrognathia                                                                                                                                 | NA                                                                                    | NA                                    | NO                    |
| Placental transfusion syndromes     | P02.3 Fetus and newborn affected by placental transfusion syndromes | INCLUDE IN ISOLATION<br>P02.3 (part) Twin reversed arterial perfusion sequence<br><br>IF REGISTRABLE ANOMALY<br>P02.3 (part) Twin-to-twin transfusion syndrome | NA                                                                                    | NA                                    | NO                    |

| Anomaly type*         | Routine inclusion (per ICD-10 code blocks)          | Inclusions subject to criteria                                                                                                             | Exclusions                                                       | Differences with EUROCAT               | Enhanced registration |
|-----------------------|-----------------------------------------------------|--------------------------------------------------------------------------------------------------------------------------------------------|------------------------------------------------------------------|----------------------------------------|-----------------------|
| Congenital infections | P35.8 Congenital zika virus infection               | IF REGISTRABLE ANOMALY<br>P35.0 Congenital rubella syndrome,<br>P35.1 Congenital cytomegalovirus infection, P37.1 Congenital toxoplasmosis | NA                                                               | NA                                     | NO                    |
| Hydrops fetalis       | P83.2 Hydrops fetalis not due to haemolytic disease | NA                                                                                                                                         | EXCLUDE always<br>P56* Hydrops fetalis due to haemolytic disease | EUROCAT exclusion but NCARDRS includes | NO                    |
| Congenital hypotonia  | NA                                                  | NA                                                                                                                                         | EXCLUDE always<br>P94.2 Congenital hypotonia                     | NA                                     | NO                    |

\* Anomaly type is organised according to ICD-10/BPA system<sup>1</sup> with some amendments to align with EUROCAT subgroup coding<sup>2</sup>, but allowing greater granularity.

<sup>1</sup>World Health Organization. ICD-10: International Statistical Classification of Diseases and Related Health Problems. Geneva: World Health Organization; 2010.

<sup>2</sup>[https://eu-rd-platform.jrc.ec.europa.eu/system/files/public/eurocat/Guide\\_1.5\\_Chapter\\_3.3.pdf](https://eu-rd-platform.jrc.ec.europa.eu/system/files/public/eurocat/Guide_1.5_Chapter_3.3.pdf)
