# Supplementary material for: Cohort profile: the National Congenital Anomaly Registration Dataset in England
Source: PubMed Central journal article supplement — BMJ Open. 2024 Jan 12;14(1):e077743. doi: 10.1136/bmjopen-2023-077743 (PMC10806630; doi:10.1136/bmjopen-2023-077743), 2024-01-12
Supplement: bmjopen-2023-077743supp001.pdf [file bmjopen-2023-077743supp001.pdf]

**Table S1 NCARDS inclusion and exclusion criteria for registerable congenital anomalies**

| <b>Anomaly type*</b>     | <b>Routine inclusion (per ICD-10 code blocks)</b>         | <b>Inclusions subject to criteria</b>                                                                                                                                                                                        | <b>Exclusions</b>                                                                                                                                                                                                                                                                                  | <b>Differences with EUROCAT</b>                                                                                                                                                     | <b>Enhanced registration</b>                                                                 |
|--------------------------|-----------------------------------------------------------|------------------------------------------------------------------------------------------------------------------------------------------------------------------------------------------------------------------------------|----------------------------------------------------------------------------------------------------------------------------------------------------------------------------------------------------------------------------------------------------------------------------------------------------|-------------------------------------------------------------------------------------------------------------------------------------------------------------------------------------|----------------------------------------------------------------------------------------------|
| Nervous system anomalies | Q00-Q07<br>Congenital malformations of the nervous system | MEASUREMENT / SEVERITY<br>Q02 Microcephaly<br>Q03.8 (part) Congenital ventriculomegaly [of lateral ventricle(s)]<br>Q04.32 Reduction anomalies of cerebellum<br><br>CLINICAL SIGNIFICANCE<br>Q04.61 (part)<br>Arachnoid cyst | EXCLUDE IN ISOLATION<br>Q0780 Jaw-winking syndrome<br>Q0782 Crocodile tears<br><br>EXCLUDE always<br>Q04.6 (part) Porencephaly                                                                                                                                                                     | Q04.6 (part) Porencephaly - EUROCAT inclusion but NCARDS excludes<br><br>Q04.61 Single congenital cerebral cyst - EUROCAT exclusion in isolation but NCARDS includes Arachnoid cyst | YES<br>Q00* Anencephaly and similar malformations<br>Q01* Encephalocele<br>Q05* Spina bifida |
| Eye anomalies            | Q10-Q15<br>Congenital malformations of eye                | NA                                                                                                                                                                                                                           | EXCLUDE IN ISOLATION<br>Q10.1 Congenital ectropion,<br>Q10.2 Congenital entropion,<br>Q10.3 Other congenital malformations of eyelid, Q10.5 Congenital stenosis or stricture of lacrimal duct<br>Q13.2 (part) Anisocoria, congenital, Q13.5 Blue sclera<br>Minor anomalies and dysmorphic features | NA                                                                                                                                                                                  | NO                                                                                           |

| Anomaly type*                | Routine inclusion (per ICD-10 code blocks)                        | Inclusions subject to criteria                 | Exclusions                                                                                                                                                                                                                                                                                          | Differences with EUROCAT | Enhanced registration |
|------------------------------|-------------------------------------------------------------------|------------------------------------------------|-----------------------------------------------------------------------------------------------------------------------------------------------------------------------------------------------------------------------------------------------------------------------------------------------------|--------------------------|-----------------------|
| Ear, face and neck anomalies | Q16 Congenital malformations of ear causing impairment of hearing | CLINICAL SIGNIFICANCE<br>Q18.3 Webbing of neck | EXCLUDE IN ISOLATION<br>Q17* Other congenital malformations of ear Q18.0-Q18.2<br>Branchial cleft malformations, Q18.4-Q18.9 Macrostomia, Microstomia, Macrocheilia, Microcheilia, Other congenital malformations of face and neck, Dysmorphic features NOS Minor anomalies and dysmorphic features | NA                       | NO                    |

| Anomaly type*                          | Routine inclusion (per ICD-10 code blocks)                | Inclusions subject to criteria                                                                                                                                                                                                                                                                                                                                                                              | Exclusions                                                                                                                                                                                                                                                                                                                                          | Differences with EUROCAT | Enhanced registration                                                                                                                                                                                                                                                                                                                                                                                                                                                                                                                                                                                                                                                                                                                                                    |
|----------------------------------------|-----------------------------------------------------------|-------------------------------------------------------------------------------------------------------------------------------------------------------------------------------------------------------------------------------------------------------------------------------------------------------------------------------------------------------------------------------------------------------------|-----------------------------------------------------------------------------------------------------------------------------------------------------------------------------------------------------------------------------------------------------------------------------------------------------------------------------------------------------|--------------------------|--------------------------------------------------------------------------------------------------------------------------------------------------------------------------------------------------------------------------------------------------------------------------------------------------------------------------------------------------------------------------------------------------------------------------------------------------------------------------------------------------------------------------------------------------------------------------------------------------------------------------------------------------------------------------------------------------------------------------------------------------------------------------|
| Heart and circulatory system anomalies | Q20-Q28<br>Congenital malformations of circulatory system | <p>PERSISTENCE</p> <p>Q21.10 Ostium secundum atrial septal defect (type II)</p> <p>CLINICAL SIGNIFICANCE</p> <p>Q24.8 Other specified congenital malformations of heart</p> <p>Q28.8 Other specified congenital malformations of circulatory system</p> <p>GESTATIONAL AGE AT DELIVERY &amp; PERSISTENCE / SURGERY / SEVERITY</p> <p>Q25.0 Patent ductus arteriosus, Q25.6 Stenosis of pulmonary artery</p> | <p>EXCLUDE IN ISOLATION</p> <p>Q21.11 Patent foramen ovale</p> <p>Q24.6 Congenital heart block</p> <p>Q25.41 Persistent right aortic arch</p> <p>Q26.1 Persistent left superior vena cava,</p> <p>Q26.8 (part) Absence of superior vena cava, Interrupted inferior vena cava</p> <p>Q27.0 Congenital absence and hypoplasia of umbilical artery</p> | NA                       | <p>YES</p> <p>SERIOUS CARDIAC ANOMALIES</p> <p>Q20.0 Common arterial trunk</p> <p>Q20.1 Double outlet right ventricle</p> <p>Q20.3 Transposition of the great arteries</p> <p>Q20.4 Double inlet ventricle</p> <p>Q21.2* Atrioventricular septal defect</p> <p>Q21.3, Q21.82 Tetralogy of Fallot</p> <p>Q22.0 Pulmonary valve atresia</p> <p>Q22.4 Congenital tricuspid stenosis</p> <p>Q22.5 Ebstein's anomaly</p> <p>Q22.6 Hypoplastic right heart syndrome</p> <p>Q23.0 Congenital stenosis of aortic valve</p> <p>Q23.2, Q23.3 Congenital mitral stenosis and insufficiency</p> <p>Q23.4 Hypoplastic left heart</p> <p>Q25.1* Coarctation of aorta</p> <p>Q25.2 Aortic atresia, interrupted aortic arch</p> <p>Q26.2 Total anomalous pulmonary venous connection</p> |

| Anomaly type*                | Routine inclusion (per ICD-10 code blocks)                            | Inclusions subject to criteria                                                                                               | Exclusions                                                                                                                                                                                            | Differences with EUROCAT | Enhanced registration                                 |
|------------------------------|-----------------------------------------------------------------------|------------------------------------------------------------------------------------------------------------------------------|-------------------------------------------------------------------------------------------------------------------------------------------------------------------------------------------------------|--------------------------|-------------------------------------------------------|
| Respiratory system anomalies | Q30-Q34<br>Congenital malformations of respiratory system             | CLINICAL SIGNIFICANCE<br>Q30.8 Other congenital malformations of nose<br><br>CAUSE<br>Q33.6 Hypoplasia and dysplasia of lung | EXCLUDE IN ISOLATION<br>Q31.5 Congenital laryngomalacia<br>Q32.0 Congenital tracheomalacia<br>Q32.2* Congenital bronchomalacia<br>Q33.00 Congenital single lung cyst<br>Q33.1* Accessory lobe of lung | NA                       | NO                                                    |
| Orofacial clefts             | Q35-Q37 Cleft lip and cleft palate                                    | MINOR FORMS<br>Q35-Q37 Cleft lip and cleft palate                                                                            | EXCLUDE IN ISOLATION<br>Q35.7 Cleft uvula                                                                                                                                                             | NA                       | YES<br>Q36*, Q37* Cleft lip with/without cleft palate |
| Abdominal wall               | Q79.2 Exomphalos<br>Q79.3<br>Gastroschisis<br>Q79.5 Body Wall complex |                                                                                                                              |                                                                                                                                                                                                       | NA                       | YES<br>Q79.2 Exomphalos<br>Q79.3 Gastroschisis        |

| Anomaly type*              | Routine inclusion (per ICD-10 code blocks)                                                             | Inclusions subject to criteria                                                                                                                                                                                                                                             | Exclusions                                                                                                                                                                                                                                                                                                                                                                                                                                                                                                            | Differences with EUROCAT | Enhanced registration                                    |
|----------------------------|--------------------------------------------------------------------------------------------------------|----------------------------------------------------------------------------------------------------------------------------------------------------------------------------------------------------------------------------------------------------------------------------|-----------------------------------------------------------------------------------------------------------------------------------------------------------------------------------------------------------------------------------------------------------------------------------------------------------------------------------------------------------------------------------------------------------------------------------------------------------------------------------------------------------------------|--------------------------|----------------------------------------------------------|
| Gastrointestinal anomalies | Q38-Q45 Other congenital malformations of the digestive system; Q79.0* Congenital diaphragmatic hernia | <p>CLINICAL SIGNIFICANCE</p> <p>Q38.3 Other congenital malformations of tongue</p> <p>Q44.5 Other congenital malformations of bile ducts</p> <p>GESTATIONAL AGE AT DIAGNOSIS &amp; SURGERY</p> <p>Q43.30 Malrotation of colon</p> <p>SURGERY</p> <p>Q43.5 Ectopic anus</p> | <p>EXCLUDE IN ISOLATION</p> <p>Q38.1 Ankyloglossia, Q38.2 Macroglossia, Q38.3 (part) Microglossia, Q38.4 (part) Congenital ranula, Q38.50 High arched palate</p> <p>Q40.0 Congenital hypertrophic pyloric stenosis, Q40.1 Congenital hiatus hernia, Q40.21 Dysmotility of stomach</p> <p>Q43.0* Meckel's diverticulum, Q43.20 Large intestinal dysmotility, Q43.81 Small intestinal dysmotility, Q43.82 Generalised intestinal dysmotility</p> <p>Q44.4 Choledochal cyst</p> <p>Q45.83 Congenital mesenteric cyst</p> | NA                       | <p>YES</p> <p>Q79.0* Congenital diaphragmatic hernia</p> |

| Anomaly type*                                        | Routine inclusion (per ICD-10 code blocks)                                     | Inclusions subject to criteria                                                                                                                     | Exclusions                                                                                                                                                                                                                                                                                                                                                                                                                         | Differences with EUROCAT                                                                            | Enhanced registration                 |
|------------------------------------------------------|--------------------------------------------------------------------------------|----------------------------------------------------------------------------------------------------------------------------------------------------|------------------------------------------------------------------------------------------------------------------------------------------------------------------------------------------------------------------------------------------------------------------------------------------------------------------------------------------------------------------------------------------------------------------------------------|-----------------------------------------------------------------------------------------------------|---------------------------------------|
| Reproductive system anomalies                        | Q50-Q56<br>Congenital malformations of genital organs                          | CLINICAL SIGNIFICANCE<br>Q55.6 Other congenital malformations of penis                                                                             | EXCLUDE IN ISOLATION<br>Q50.1* Developmental ovarian cyst, Q50.2 Congenital torsion of ovary, Q50.5 Embryonic cyst of broad ligament, Q52.3 Imperforate hymen, Q52.4 (part) Congenital hypertrophy of hymen, Q52.5 Fusion of labia<br>Q52.7 (part) Minor other congenital malformations of vulva<br>Q54.4 Congenital chordee<br>Q55.20 Retractable testis, Q55.21 Bifid scrotum<br><br>EXCLUDE always<br>Q53* Undescended testicle | Q52.7 (part)<br>Congenital rectovulval fistula - EUROCAT exclusion in isolation but NCARDS includes | NO                                    |
| Congenital anomalies of the kidney and urinary tract | Q60-Q64<br>Congenital malformations of the urinary system;<br>Q794 Prune Belly | MEASUREMENT / SEVERITY<br>Q62.0 Congenital hydronephrosis<br><br>CLINICAL SIGNIFICANCE<br>Q63.8 Other specified congenital malformations of kidney | EXCLUDE IN ISOLATION<br>Q61.0 Congenital single renal cyst<br>Q62.7* Congenital vesico-uretero-renal reflux<br>Q63.3 Hyperplastic and giant kidney                                                                                                                                                                                                                                                                                 | NA                                                                                                  | YES<br>Q60.1 Bilateral renal agenesis |

| Anomaly type*                                        | Routine inclusion (per ICD-10 code blocks)        | Inclusions subject to criteria                                                                                                                                                                                                            | Exclusions                                                                                                                                                                                                                                                                                                                                                                                                                                | Differences with EUROCAT                                                                | Enhanced registration |
|------------------------------------------------------|---------------------------------------------------|-------------------------------------------------------------------------------------------------------------------------------------------------------------------------------------------------------------------------------------------|-------------------------------------------------------------------------------------------------------------------------------------------------------------------------------------------------------------------------------------------------------------------------------------------------------------------------------------------------------------------------------------------------------------------------------------------|-----------------------------------------------------------------------------------------|-----------------------|
| Congenital deformities of the musculoskeletal system | Q65-Q68<br>Congenital musculoskeletal deformities | <p>PERSISTENCE<br/>Q65.80 &amp; Q65.81<br/>Dysplastic hip</p> <p>CAUSE<br/>Q68.8 (part)<br/>Arthrogryposis, not otherwise specified</p>                                                                                                   | <p>EXCLUDE IN ISOLATION<br/>Q65.3-Q65.5 Congenital subluxation of hip, Q65.6*<br/>Unstable hip<br/>Q66.1-Q66.9 Congenital deformities of feet (except include talipes equinovarus)<br/>Q67* Congenital musculoskeletal deformities of head, face, spine and chest<br/>Q68.0 Congenital deformity of sternocleidomastoid muscle, Q68.10 Clinodactyly, Q68.21 Genu recurvatum, Q68.3-Q68.5 Congenital bowing of femur, tibia and fibula</p> | Q65.80 & Q65.81<br>Dysplastic hip - EUROCAT exclusion in isolation but NCARDRS includes | NO                    |
| Congenital malformations of the limbs                | Q69-Q74<br>Congenital malformations of limb(s)    | <p>CLINICAL SIGNIFICANCE<br/>Q70.2 Fused toes<br/>Q703 Webbed toes,<br/>Q70.9 Syndactyly, unspecified<br/>Q74.2 Other congenital malformations of lower limb(s), including pelvic girdle<br/>Q74.82 Congenital undergrowth of limb(s)</p> | <p>EXCLUDE IN ISOLATION<br/>Q74.0 (part) Congenital cubitus valgus, Q74.00 Accessory carpal bone</p>                                                                                                                                                                                                                                                                                                                                      | NA                                                                                      | NO                    |

| Anomaly type*                                                         | Routine inclusion (per ICD-10 code blocks)                       | Inclusions subject to criteria                                                                                                                                                                                                                                                                                                                                                                                            | Exclusions                                                                                                                                                                                                                                                                                                                                         | Differences with EUROCAT | Enhanced registration                                                                                                                 |
|-----------------------------------------------------------------------|------------------------------------------------------------------|---------------------------------------------------------------------------------------------------------------------------------------------------------------------------------------------------------------------------------------------------------------------------------------------------------------------------------------------------------------------------------------------------------------------------|----------------------------------------------------------------------------------------------------------------------------------------------------------------------------------------------------------------------------------------------------------------------------------------------------------------------------------------------------|--------------------------|---------------------------------------------------------------------------------------------------------------------------------------|
| Congenital malformations of other parts of the musculoskeletal system | Q75-Q79 Other congenital malformations of musculoskeletal system | <p>CAUSE</p> <p>Q75.02 Trigonocephaly</p> <p>CLINICAL SIGNIFICANCE</p> <p>Q75.8* Other specified congenital malformations of skull and face bones</p> <p>Q76.4 Other congenital malformations of spine, not associated with scoliosis</p> <p>GESTATIONAL AGE AT DIAGNOSIS</p> <p>Q79.5 (part) Congenital abdominal wall defect not otherwise specified</p> <p>CONSEQUENCE</p> <p>Q79.80 Congenital constriction bands</p> | <p>EXCLUDE IN ISOLATION</p> <p>Q75.00 (part) Brachycephaly, Q75.2 Hypertelorism, Q75.3*</p> <p>Macrocephaly</p> <p>Q76.0 Spina bifida occulta, Q76.43 Congenital lordosis, postural, Q76.5 Cervical rib, Q76.60 Congenital absence of rib, Q76.62 Accessory rib, Q76.71 Sternum bifidum</p> <p>Q79.5 (part) - Congenital divarication of recti</p> | NA                       | <p>YES</p> <p>Q77*/Q78* (part) Lethal and severe skeletal dysplasias e.g. Thanatophoric dysplasia, Short rib-polydactyly syndrome</p> |



| Anomaly type*                          | Routine inclusion (per ICD-10 code blocks)        | Inclusions subject to criteria | Exclusions                                                                                                                                                                                                                                                                                                                                | Differences with EUROCAT | Enhanced registration |
|----------------------------------------|---------------------------------------------------|--------------------------------|-------------------------------------------------------------------------------------------------------------------------------------------------------------------------------------------------------------------------------------------------------------------------------------------------------------------------------------------|--------------------------|-----------------------|
| Integument anomalies                   | Q80-Q84<br>Congenital malformations of integument | NA                             | EXCLUDE IN ISOLATION<br>Q82.5* Congenital non-neoplastic naevus, Q82.8 (part)<br>Dermatoglyphic anomalies,<br>Q82.80 Abnormal palmar creases,<br>Q82.81 Accessory skin tags<br>Q83.3 Accessory nipple<br>Q84.2 (part) Persistent lanugo, Q84.5 (part)<br>Enlarged or hypertrophic nails,<br>Q84.6 Other congenital malformations of nails | NA                       | NO                    |
| Phakomatoses, not elsewhere classified | Q85<br>Phakomatoses, not elsewhere classified     | NA                             | NA                                                                                                                                                                                                                                                                                                                                        | NA                       | NO                    |

| Anomaly type*                           | Routine inclusion (per ICD-10 code blocks)                                                     | Inclusions subject to criteria                                                                                                                                                                                                               | Exclusions                                                                  | Differences with EUROCAT | Enhanced registration |
|-----------------------------------------|------------------------------------------------------------------------------------------------|----------------------------------------------------------------------------------------------------------------------------------------------------------------------------------------------------------------------------------------------|-----------------------------------------------------------------------------|--------------------------|-----------------------|
| Teratogenic syndromes                   | Q86* Congenital malformation syndromes due to known exogenous causes, not elsewhere classified | MATERNAL HISTORY & CONSEQUENCE<br>Q86.0 Fetal alcohol syndrome<br><br>KNOWN AETIOLOGY & CONSEQUENCE<br>Q86.1-Q86.8* Fetal hydantoin syndrome, Fetal warfarin syndrome, Other congenital malformation syndromes due to known exogenous causes | NA                                                                          | NA                       | NO                    |
| Other congenital malformation syndromes | Q87* Other specified congenital malformation syndromes (multiple systems)                      | NA                                                                                                                                                                                                                                           | EXCLUDE IN ISOLATION<br>Q87.4 (part) Arachnodactyly not otherwise specified | NA                       | NO                    |
| Other anomalies                         | Q89* Other congenital malformations, not elsewhere classified                                  | NA                                                                                                                                                                                                                                           | EXCLUDE IN ISOLATION<br>Q89.9 Congenital malformation, unspecified          | NA                       | NO                    |

| Anomaly type*        | Routine inclusion (per ICD-10 code blocks)                                                                                                                                                                          | Inclusions subject to criteria                                                                          | Exclusions                                                                                                                                                                                                                       | Differences with EUROCAT                                                                                                                                                                                                     | Enhanced registration                                                      |
|----------------------|---------------------------------------------------------------------------------------------------------------------------------------------------------------------------------------------------------------------|---------------------------------------------------------------------------------------------------------|----------------------------------------------------------------------------------------------------------------------------------------------------------------------------------------------------------------------------------|------------------------------------------------------------------------------------------------------------------------------------------------------------------------------------------------------------------------------|----------------------------------------------------------------------------|
| Chromosomal          | Q90-Q99<br>Chromosomal                                                                                                                                                                                              | IF REGISTRABLE ANOMALY<br>Q95* Balanced rearrangements and structural markers, not elsewhere classified | EXCLUDE always<br>Q95.0 Balanced translocation and insertion in normal individual, Q95.1 Chromosome inversion in normal individual, Q95.4 Individuals with marker heterochromatin, Q95.5 Individuals with autosomal fragile site | NA                                                                                                                                                                                                                           | YES<br>Q90* Down's syndrome<br>Q91* Edwards' syndrome and Patau's syndrome |
| Congenital neoplasms | D15.1 Cardiac rhabdomyoma<br>D18.10 Cystic hygroma (congenital)<br>D21.5 Sacrococcygeal teratoma, Sacral teratoma<br>D21.9 Rhabdomyoma of other organs [i.e. not heart]<br>D48.7 Teratoma, not elsewhere classified | CLINICAL SIGNIFICANCE<br>D18.0 Haemangioma, any site, D18.1 Lymphangioma, any site                      | NA                                                                                                                                                                                                                               | EUROCAT exclusion but NCARDRS includes<br>D15.1 Cardiac rhabdomyoma, D18.0 Haemangioma, any site, D18.1 Lymphangioma, any site, D21.9 Rhabdomyoma of other organs [i.e. not heart], D48.7 Teratoma, not elsewhere classified | NO                                                                         |
| Di George syndrome   | D82.1 Di George syndrome                                                                                                                                                                                            | NA                                                                                                      | NA                                                                                                                                                                                                                               | NA                                                                                                                                                                                                                           | NO                                                                         |

| <b>Anomaly type*</b>                | <b>Routine inclusion (per ICD-10 code blocks)</b>                   | <b>Inclusions subject to criteria</b>                                                                                                                          | <b>Exclusions</b>                                                                     | <b>Differences with EUROCAT</b>       | <b>Enhanced registration</b> |
|-------------------------------------|---------------------------------------------------------------------|----------------------------------------------------------------------------------------------------------------------------------------------------------------|---------------------------------------------------------------------------------------|---------------------------------------|------------------------------|
| Waardenburg syndrome                | E70.30 Waardenburg syndrome                                         | NA                                                                                                                                                             | NA                                                                                    | NA                                    | NO                           |
| Cystic fibrosis                     | E84* Cystic fibrosis                                                | NA                                                                                                                                                             | NA                                                                                    | EUROCAT exclusion but NCARDS includes | NO                           |
| Spinal muscular atrophy             | G12* Spinal muscular atrophy and related syndromes                  | NA                                                                                                                                                             | NA                                                                                    | EUROCAT exclusion but NCARDS includes | NO                           |
| Congenital chylothorax              | NA                                                                  | NA                                                                                                                                                             | EXCLUDE IN ISOLATION<br>I89.8 Chylothorax (lymphatic);<br>J94.0 Chylothorax (chylous) | NA                                    | NO                           |
| Paralysis of vocal cords and larynx | NA                                                                  | NA                                                                                                                                                             | EXCLUDE IN ISOLATION<br>J38.0 Paralysis of vocal cords and larynx                     | NA                                    | NO                           |
| Micrognathia                        |                                                                     | SEVERITY<br>K07.0 Micrognathia                                                                                                                                 | NA                                                                                    | NA                                    | NO                           |
| Placental transfusion syndromes     | P02.3 Fetus and newborn affected by placental transfusion syndromes | INCLUDE IN ISOLATION<br>P02.3 (part) Twin reversed arterial perfusion sequence<br><br>IF REGISTRABLE ANOMALY<br>P02.3 (part) Twin-to-twin transfusion syndrome | NA                                                                                    | NA                                    | NO                           |

| Anomaly type*         | Routine inclusion (per ICD-10 code blocks)          | Inclusions subject to criteria                                                                                                          | Exclusions                                                       | Differences with EUROCAT              | Enhanced registration |
|-----------------------|-----------------------------------------------------|-----------------------------------------------------------------------------------------------------------------------------------------|------------------------------------------------------------------|---------------------------------------|-----------------------|
| Congenital infections | P35.8 Congenital zika virus infection               | IF REGISTRABLE ANOMALY<br>P35.0 Congenital rubella syndrome, P35.1 Congenital cytomegalovirus infection, P37.1 Congenital toxoplasmosis | NA                                                               | NA                                    | NO                    |
| Hydrops fetalis       | P83.2 Hydrops fetalis not due to haemolytic disease | NA                                                                                                                                      | EXCLUDE always<br>P56* Hydrops fetalis due to haemolytic disease | EUROCAT exclusion but NCARDS includes | NO                    |
| Congenital hypotonia  | NA                                                  | NA                                                                                                                                      | EXCLUDE always<br>P94.2 Congenital hypotonia                     | NA                                    | NO                    |

\* Anomaly type is organised according to ICD-10/BPA system<sup>1</sup> with some amendments to align with EUROCAT subgroup coding<sup>2</sup>, but allowing greater granularity.

<sup>1</sup>World Health Organization. ICD-10: International Statistical Classification of Diseases and Related Health Problems. Geneva: World Health Organization; 2010.

<sup>2</sup>[https://eu-rd-platform.jrc.ec.europa.eu/system/files/public/eurocat/Guide\\_1.5\\_Chapter\\_3.3.pdf](https://eu-rd-platform.jrc.ec.europa.eu/system/files/public/eurocat/Guide_1.5_Chapter_3.3.pdf)
